# Supplementary material for: Exome sequencing in fetuses with short long bones detected by ultrasonography: A retrospective cohort study
Source: Front Genet. 2023 Feb 27;14:1032346. doi: 10.3389/fgene.2023.1032346 (PMC10010437; doi:10.3389/fgene.2023.1032346)
Supplement: Supplementary file 1 [file Table2.XLSX]

## Sheet: Sheet1
Additional file 2 Table S2. Number of variants analyzed in screening steps
Case No.	Step1:Genotype-driven	Step2: Phenotype-driven	Step3: Manual review	Overall Conclusion
	Total number of variants based on sequencing quality/variant types/minor allele frequency/computational tools	Total number of variants based on HPO matching	Total Number of variants interpreted as relevant after close review
1	158	5	1	Positive
2	116	6	1	Positive
3	120	10	1	Positive
4	144	8	1	Positive
5	101	6	1	Positive
6	111	3	1	Positive
7	80	3	1	Positive
8	124	6	1	Positive
9	115	5	2	Positive
10	96	5	2	Positive
11	109	7	2	Positive
12	107	3	1	Positive
13	102	4	1	Positive
14	125	4	1	Positive
15	109	4	1	Positive
16	98	4	1	Positive
17	139	9	1	Positive
18	96	4	1	Positive
19	101	5	1	Positive
20	108	7	1	Positive
21	138	9	1	Positive
22	105	4	1	Positive
23	154	6	1	Positive
24	113	9	1	Positive
25	112	4	1	Positive
26	111	5	1	Positive
27	108	5	1	Positive
28	131	5	1	Positive
29	114	7	1	Positive
31	114	6	1	Positive
32	120	7	1	Positive
33	89	5	1	Positive
34	99	6	2	Positive
35	104	8	1	Positive
36	109	13	1	Positive
37	96	4	1	Positive
38	96	4	1	Positive
39	117	6	2	Inconclusive
40	91	5	1	Inconclusive
41	105	3	1	Inconclusive
42	86	6	2	Inconclusive
43	123	7	2	Inconclusive
44	108	5	0	Negative
45	142	5	0	Negative
46	73	3	0	Negative
47	151	7	0	Negative
48	108	7	0	Negative
49	120	3	0	Negative
50	106	6	0	Negative
51	91	6	0	Negative
52	100	6	0	Negative
53	113	4	0	Negative
54	126	5	0	Negative
55	121	6	0	Negative
56	117	3	0	Negative
57	109	4	0	Negative
58	107	6	0	Negative
59	135	10	0	Negative
60	87	3	0	Negative
61	127	7	0	Negative
62	130	6	0	Negative
63	127	8	0	Negative
64	119	7	0	Negative
65	122	5	0	Negative
66	136	5	0	Negative
67	89	6	0	Negative
68	126	6	0	Negative
69	142	7	0	Negative
70	118	7	0	Negative
71	125	6	0	Negative
72	102	5	0	Negative
73	118	7	0	Negative
74	113	5	0	Negative
75	107	4	0	Negative
76	111	6	0	Negative
77	110	4	0	Negative
78	130	5	0	Negative
79	115	9	0	Negative
80	69	4	0	Negative
81	104	7	0	Negative
82	106	6	0	Negative
83	113	14	0	Negative
84	102	7	0	Negative
85	75	4	0	Negative
86	116	4	0	Negative
87	124	9	0	Negative
88	138	11	0	Negative
89	164	7	0	Negative
90	149	5	0	Negative
91	101	4	0	Negative
92	105	11	0	Negative
93	99	8	0	Negative
94	130	9	0	Negative
