# Supplementary material for: Exome sequencing in fetuses with short long bones detected by ultrasonography: A retrospective cohort study
Source: Front Genet. 2023 Feb 27;14:1032346. doi: 10.3389/fgene.2023.1032346 (PMC10010437; doi:10.3389/fgene.2023.1032346)
Supplement: Supplementary file 2 [file Table3.xlsx]

## Sheet: Sheet1
Additional file 3 Table S3. Information of all variants passing each variant screening step
Case No.	Chromosome Location	gene	Transcript	Nucleotide change	Amino acid change	Variant type	Sequencing depth	Heterozygosity	Screened at analysis step
1	1:176760479	PAPPA2	NM_020318.3	c.4885-4C>T		noncoding	228	0.513	Step 1 and 2
1	4:126241969	FAT4	NM_001291303.3	c.4403A>G	p.(His1468Arg)	missense	473	0.526	Step 1 and 2
1	9:98238392	PTCH1	NM_000264.5	c.1652C>T	p.(Thr551Met)	missense	263	0.456	Step 1 and 2
1	16:30736294	SRCAP	NM_006662.3	c.5549C>A	p.(Thr1850Lys)	missense	224	0.491	Step 1 and 2
1	17:48273674	COL1A1	NM_000088.4	c.957+1G>T		splice	382	0.492	Step 1,2 and 3
1	1:213068369	FLVCR1	NM_014053.4	c.1567G>A	p.(Gly523Arg)	missense	245	0.469	Step 1
1	1:109773516	SARS1	NM_006513.4	c.464T>A	p.(Val155Glu)	missense	90	0.522	Step 1
1	1:39847651	MACF1	NM_001394062.1	c.13675G>T	p.(Val4559Phe)	missense	239	0.51	Step 1
1	1:43395555	SLC2A1	NM_006516.4	c.668G>A	p.(Arg223Gln)	missense	324	0.475	Step 1
1	1:179851942	TOR1AIP1	NM_015602.4	c.305G>A	p.(Ser102Asn)	missense	168	0.482	Step 1
1	1:228271079	ARF1	NM_001658.4	c.-38+613C>G		noncoding	216	0.486	Step 1
1	1:228345437	GJC2	NM_020435.4	c.-19-4A>C		noncoding	75	0.106	Step 1
1	1:183205618	LAMC2	NM_005562.3	c.2480C>T	p.(Ala827Val)	missense	214	0.471	Step 1
1	1:243716188	AKT3	NM_005465.7	c.1006A>G	p.(Met336Val)	missense	312	0.48	Step 1
1	2:179585878	TTN	NM_001267550.2	c.22868G>A	p.(Gly7623Glu)	missense	440	0.436	Step 1
1	3:52326642	GLYCTK	NM_145262.4	c.1072C>T	p.(Arg358Cys)	missense	232	0.478	Step 1
1	4:6302757	WFS1	NM_006005.3	c.1235T>C	p.(Val412Ala)	missense	346	0.488	Step 1
1	4:3076644	HTT	NM_001388492.1	c.93_94del	p.(Gln32AlafsTer50)	frameshift	62	0.5	Step 1
1	4:3076647	HTT	NM_001388492.1	c.96_102del	p.(Gln32HisfsTer67)	frameshift	63	0.476	Step 1
1	4:3208244	HTT	NM_001388492.1	c.5740G>T	p.(Glu1914Ter)	nonsense	224	0.151	Step 1
1	2:241680682	KIF1A	NM_001244008.2	c.3749+4A>C		noncoding	196	0.505	Step 1
1	4:88537035	DSPP	NM_014208.3	c.3221A>T	p.(Asp1074Val)	missense	102	0.578	Step 1
1	4:88583495	DMP1	NM_004407.4	c.565A>T	p.(Ser189Cys)	missense	393	0.564	Step 1
1	6:31323992	HLA-B	NM_005514.8	c.571T>G	p.(Trp191Gly)	missense	121	0.479	Step 1
1	6:31323993	HLA-B	NM_005514.8	c.570G>C	p.(Glu190Asp)	missense	123	0.471	Step 1
1	4:104084421	CENPE	NM_001813.3	c.1723-8T>G		noncoding	237	0.468	Step 1
1	5:139493895	PURA	NM_005859.5	c.144_146dup	p.(Gly49dup)	inframe	39	0.333	Step 1
1	5:71494191	MAP1B	NM_005909.5	c.5009C>G	p.(Pro1670Arg)	missense	378	0.552	Step 1
1	5:156816282	CYFIP2	NM_001037333.3	c.3293G>A	p.(Arg1098His)	missense	301	0.465	Step 1
1	5:160973808	GABRB2	NM_021911.3	c.-152-9_-152-8del		noncoding	169	0.216	Step 1
1	6:88218202	SLC35A1	NM_006416.5	c.639G>A	p.(Met213Ile)	missense	184	0.456	Step 1
1	7:151945228	KMT2C	NM_170606.3	c.2291C>T	p.(Ser764Phe)	missense	545	0.091	Step 1
1	7:151859476	KMT2C	NM_170606.3	c.11186C>T	p.(Pro3729Leu)	missense	447	0.487	Step 1
1	8:41790442	KAT6A	NM_006766.5	c.5296C>T	p.(Pro1766Ser)	missense	302	0.519	Step 1
1	8:48874880	MCM4	NM_182746.3	c.415A>G	p.(Ile139Val)	missense	279	0.451	Step 1
1	5:13886173	DNAH5	NM_001369.3	c.2643T>G	p.(Asn881Lys)	missense	265	0.158	Step 1
1	8:75157110	JPH1	NM_020647.4	c.1559C>T	p.(Thr520Met)	missense	333	0.489	Step 1
1	8:77896357	PEX2	NM_000318.3	c.58T>G	p.(Leu20Val)	missense	406	0.458	Step 1
1	8:126056855	WASHC5	NM_014846.4	c.2590A>C	p.(Ile864Leu)	missense	322	0.518	Step 1
1	6:129704300	LAMA2	NM_000426.4	c.4993G>A	p.(Gly1665Arg)	missense	356	0.514	Step 1
1	8:143958593	CYP11B1	NM_000497.4	c.441A>T	p.(Glu147Asp)	missense	343	0.495	Step 1
1	8:145024775	PLEC	NM_201378.4	c.71-11915C>T		noncoding	202	0.574	Step 1
1	10:73103990	SLC29A3	NM_018344.6	c.325G>A	p.(Val109Ile)	missense	268	0.537	Step 1
1	9:101216348	GABBR2	NM_005458.8	c.1151G>A	p.(Arg384Gln)	missense	326	0.453	Step 1
1	9:123342234	CDK5RAP2	NM_018249.6	c.23A>G	p.(Glu8Gly)	missense	173	0.485	Step 1
1	6:157100043	ARID1B	NM_001374828.1	c.1241_1246del	p.(Ala414_Gly415del)	inframe	33	0.515	Step 1
1	6:157100064	ARID1B	NM_001374828.1	c.1250C>T	p.(Ala417Val)	missense	33	0.575	Step 1
1	6:166580094	TBXT	NM_001366285.2	c.457A>C	p.(Asn153His)	missense	244	0.184	Step 1
1	9:131757137	NUP188	NM_015354.3	c.3090C>T	p.(Pro1030=)	synonymous	252	0.456	Step 1
1	7:142458566	PRSS1	NM_002769.5	c.200+1G>A		splice	213	0.084	Step 1
1	7:1529232	INTS1	NM_001080453.3	c.2252A>G	p.(Asn751Ser)	missense	205	0.492	Step 1
1	7:1539980	INTS1	NM_001080453.3	c.372T>G	p.(Asp124Glu)	missense	213	0.154	Step 1
1	12:49436102	KMT2D	NM_003482.4	c.5879G>A	p.(Gly1960Asp)	missense	193	0.559	Step 1
1	11:68679025	IGHMBP2	NM_002180.3	c.665C>T	p.(Thr222Met)	missense	291	0.443	Step 1
1	12:122079473	ORAI1	NM_032790.3	c.836C>T	p.(Ala279Val)	missense	236	0.47	Step 1
1	11:118927725	HYOU1	NM_006389.5	c.-8+6G>A		noncoding	119	0.436	Step 1
1	13:43174924	TNFSF11	NM_003701.4	c.424G>A	p.(Ala142Thr)	missense	359	0.415	Step 1
1	14:74754517	ABCD4	NM_005050.4	c.1632C>T	p.(Tyr544=)	synonymous	221	0.479	Step 1
1	14:74988673	LTBP2	NM_000428.3	c.2729C>T	p.(Ser910Phe)	missense	230	0.434	Step 1
1	16:1607943	IFT140	NM_014714.4	c.2392A>C	p.(Ile798Leu)	missense	258	0.189	Step 1
1	14:105818741	PACS2	NM_001100913.3	c.234T>G	p.(His78Gln)	missense	260	0.146	Step 1
1	14:100728663	YY1	NM_003403.5	c.702T>G	p.(His234Gln)	missense	257	0.155	Step 1
1	17:73729749	ITGB4	NM_000213.5	c.1633C>T	p.(Arg545Cys)	missense	168	0.547	Step 1
1	18:20596894	RBBP8	NM_002894.3	c.2454+7A>C		noncoding	205	0.468	Step 1
1	16:56545120	BBS2	NM_031885.5	c.422A>G	p.(Asn141Ser)	missense	361	0.493	Step 1
1	18:24128467	KCTD1	NM_001142730.3	c.34A>C	p.(Thr12Pro)	missense	41	0.17	Step 1
1	16:88898455	GALNS	NM_000512.5	c.953T>G	p.(Met318Arg)	missense	134	0.507	Step 1
1	16:68712185	CDH3	NM_001793.6	c.390+5G>A		noncoding	269	0.46	Step 1
1	16:89350786	ANKRD11	NM_013275.6	c.2164A>C	p.(Lys722Gln)	missense	326	0.487	Step 1
1	17:78064032	CCDC40	NM_017950.4	c.2832+381_2832+412dup		noncoding	59	0.271	Step 1
1	16:70986379	HYDIN	NM_001270974.2	c.6476G>C	p.(Ser2159Thr)	missense	141	0.503	Step 1
1	16:71007881	HYDIN	NM_001270974.2	c.5080G>A	p.(Val1694Met)	missense	502	0.264	Step 1
1	16:88502823	ZNF469	NM_001367624.2	c.8945A>G	p.(Asp2982Gly)	missense	361	0.443	Step 1
1	19:11094931	SMARCA4	NM_003072.5	c.104C>T	p.(Ser35Leu)	missense	192	0.552	Step 1
1	19:11356334	DOCK6	NM_020812.4	c.928C>T	p.(Arg310Trp)	missense	269	0.509	Step 1
1	19:42874974	MEGF8	NM_001271938.2	c.7127A>C	p.(Lys2376Thr)	missense	42	0.261	Step 1
1	19:36214675	KMT2B	NM_014727.3	c.3101A>C	p.(Glu1034Ala)	missense	204	0.176	Step 1
1	X:128948720	ZDHHC9	NM_016032.4	c.539A>C	p.(Asn180Thr)	missense	124	0.217	Step 1
1	1:16377968	CLCNKB	NM_000085.5	c.1228-5C>T		noncoding	177	0.135	Step 1
1	1:16377969	CLCNKB	NM_000085.5	c.1228-4A>G		noncoding	178	0.134	Step 1
1	1:47882357	FOXE3	NM_012186.3	c.370A>C	p.(Thr124Pro)	missense	80	0.187	Step 1
1	1:66102333	LEPR	NM_002303.6	c.3133A>T	p.(Asn1045Tyr)	missense	415	0.486	Step 1
1	1:235659576	B3GALNT2	NM_152490.5	c.113-1438C>T		noncoding	38	0.5	Step 1
1	1:155451028	ASH1L	NM_018489.3	c.1633T>C	p.(Ser545Pro)	missense	374	0.524	Step 1
1	4:39322048	RFC1	NM_002913.5	c.1050G>C	p.(Glu350Asp)	missense	156	0.128	Step 1
1	5:131546170	P4HA2	NM_001017974.2	c.516G>A	p.(Met172Ile)	missense	227	0.493	Step 1
1	6:108197874	SEC63	NM_007214.5	c.1936-8G>T		noncoding	79	0.39	Step 1
1	9:420536	DOCK8	NM_203447.4	c.3976A>G	p.(Arg1326Gly)	missense	313	0.482	Step 1
1	9:130984509	DNM1	NM_004408.4	c.883G>T	p.(Gly295Trp)	missense	233	0.506	Step 1
1	15:89865024	POLG	NM_002693.3	c.2541C>T	p.(Ala847=)	synonymous	268	0.533	Step 1
1	12:6458324	SCNN1A	NM_001038.6	c.1497+6G>C		noncoding	275	0.494	Step 1
1	12:6464518	SCNN1A	NM_001038.6	c.1063G>A	p.(Gly355Arg)	missense	261	0.467	Step 1
1	16:21982858	UQCRC2	NM_003366.4	c.683C>T	p.(Pro228Leu)	missense	256	0.55	Step 1
1	16:89245912	CDH15	NM_004933.3	c.131G>A	p.(Arg44Gln)	missense	205	0.521	Step 1
1	17:4904688	KIF1C	NM_006612.6	c.355G>A	p.(Val119Met)	missense	274	0.463	Step 1
1	19:50813033	MYH14	NM_001145809.2	c.6097G>C	p.(Ala2033Pro)	missense	92	0.086	Step 1
1	X:148059991	AFF2	NM_002025.4	c.3570+6G>T		noncoding	146	1	Step 1
1	1:168260648	TBX19	NM_005149.3	c.454A>C	p.(Asn152His)	missense	269	0.137	Step 1
1	2:26683071	OTOF	NM_194248.3	c.5816G>A	p.(Arg1939Gln)	missense	177	0.48	Step 1
1	2:27461392	CAD	NM_004341.5	c.4954C>T	p.(Arg1652Cys)	missense	282	0.524	Step 1
1	1:152284040	FLG	NM_002016.2	c.3321del	p.(Gly1109GlufsTer13)	frameshift	438	0.481	Step 1
1	1:152275953	FLG	NM_002016.2	c.11409G>C	p.(Gln3803His)	missense	419	0.513	Step 1
1	2:70475556	TIA1	NM_022173.4	c.7G>A	p.(Asp3Asn)	missense	154	0.435	Step 1
1	1:196749028	CFHR3	NM_021023.6	c.355G>A	p.(Gly119Ser)	missense	380	0.418	Step 1
1	1:237794770	RYR2	NM_001035.3	c.6484A>C	p.(Met2162Leu)	missense	254	0.196	Step 1
1	1:207707606	CR1	NM_000651.6	c.1716G>T	p.(Gln572His)	missense	22	0.181	Step 1
1	2:186654136	FSIP2	NM_173651.4	c.2273T>C	p.(Ile758Thr)	missense	501	0.465	Step 1
1	2:1647186	PXDN	NM_012293.3	c.3906C>G	p.(Asp1302Glu)	missense	208	0.475	Step 1
1	2:233712060	GIGYF2	NM_001103146.3	c.3463C>A	p.(Pro1155Thr)	missense	276	1	Step 1
1	2:238461004	MLPH	NM_024101.7	c.1700G>A	p.(Arg567Gln)	missense	267	0.475	Step 1
1	3:38052712	PLCD1	NM_006225.4	c.783C>A	p.(Ser261Arg)	missense	246	0.524	Step 1
1	4:103645117	MANBA	NM_005908.4	c.280C>A	p.(Gln94Lys)	missense	255	0.529	Step 1
1	5:147817927	FBXO38	NM_205836.3	c.2890G>A	p.(Val964Ile)	missense	379	0.44	Step 1
1	5:169502999	DOCK2	NM_004946.3	c.4777G>C	p.(Asp1593His)	missense	257	0.494	Step 1
1	5:169812421	KCNMB1	NM_004137.4	c.31C>T	p.(Arg11Trp)	missense	313	0.479	Step 1
1	6:105573291	BVES	NM_001199563.2	c.514C>T	p.(Arg172Cys)	missense	320	0.509	Step 1
1	5:177649545	PHYKPL	NM_153373.4	c.738T>G	p.(Asp246Glu)	missense	202	0.133	Step 1
1	5:33947381	SLC45A2	NM_016180.5	c.1255C>A	p.(Pro419Thr)	missense	399	0.493	Step 1
1	8:144512545	MAFA	NM_201589.4	c.32T>C	p.(Leu11Pro)	missense	18	0.388	Step 1
1	10:82034769	MAT1A	NM_000429.3	c.951+4A>G		noncoding	219	0.538	Step 1
1	10:112541418	RBM20	NM_001134363.3	c.1051G>C	p.(Asp351His)	missense	310	0.506	Step 1
1	9:133327694	ASS1	NM_054012.4	c.79C>A	p.(Gln27Lys)	missense	253	0.482	Step 1
1	9:133374932	ASS1	NM_054012.4	c.1168G>A	p.(Gly390Arg)	missense	212	0.504	Step 1
1	12:18841130	PLCZ1	NM_033123.4	c.1484C>T	p.(Pro495Leu)	missense	275	0.414	Step 1
1	9:135866432	GFI1B	NM_001377304.1	c.988A>C	p.(Lys330Gln)	missense	234	0.132	Step 1
1	12:40643665	LRRK2	NM_198578.4	c.876T>G	p.(His292Gln)	missense	322	0.161	Step 1
1	11:66638594	PC	NM_001040716.2	c.562G>A	p.(Gly188Ser)	missense	270	0.562	Step 1
1	11:78383256	TENM4	NM_001098816.3	c.5615G>C	p.(Ser1872Thr)	missense	386	0.494	Step 1
1	11:92714996	MTNR1B	NM_005959.5	c.607G>A	p.(Ala203Thr)	missense	279	0.519	Step 1
1	15:73615178	HCN4	NM_005477.3	c.3256A>C	p.(Ile1086Leu)	missense	301	0.132	Step 1
1	15:73660416	HCN4	NM_005477.3	c.196G>C	p.(Glu66Gln)	missense	46	0.5	Step 1
1	14:68274321	ZFYVE26	NM_015346.4	c.680G>T	p.(Cys227Phe)	missense	281	0.533	Step 1
1	15:43164963	TTBK2	NM_173500.4	c.70-7T>C		noncoding	228	0.53	Step 1
1	18:28609500	DSC3	NM_001941.5	c.449G>A	p.(Gly150Asp)	missense	367	0.427	Step 1
1	18:44109141	LOXHD1	NM_001384474.1	c.4529C>T	p.(Thr1510Met)	missense	282	0.421	Step 1
1	17:26115915	NOS2	NM_000625.4	c.238T>A	p.(Ser80Thr)	missense	278	0.496	Step 1
1	17:36486307	GPR179	NM_001004334.4	c.3145G>A	p.(Ala1049Thr)	missense	273	0.479	Step 1
1	22:32439365	SLC5A1	NM_000343.4	c.97G>A	p.(Val33Ile)	missense	276	0.496	Step 1
1	21:40570769	BRWD1	NM_033656.4	c.5573A>T	p.(Gln1858Leu)	missense	427	0.454	Step 1
1	19:8436337	ANGPTL4	NM_139314.3	c.970G>A	p.(Val324Ile)	missense	189	0.518	Step 1
1	17:45822118	TBX21	NM_013351.2	c.994T>C	p.(Tyr332His)	missense	266	0.481	Step 1
1	22:46859781	CELSR1	NM_001378328.1	c.4006G>A	p.(Val1336Met)	missense	400	0.485	Step 1
1	21:47558796	FTCD	NM_206965.2	c.1302C>T	p.(Asp434=)	synonymous	244	0.528	Step 1
1	22:18604433	TUBA8	NM_018943.3	c.191G>A	p.(Arg64Gln)	missense	205	0.517	Step 1
1	X:120182092	GLUD2	NM_012084.4	c.554G>C	p.(Gly185Ala)	missense	160	1	Step 1
1	19:55536607	GP6	NM_001083899.2	c.643G>A	p.(Glu215Lys)	missense	194	0.438	Step 1
1	1:8421117	RERE	NM_001042681.2	c.2450C>T	p.(Pro817Leu)	missense	333	0.528	Step 1
1	8:90971041	NBN	NM_002485.5	c.1036G>A	p.(Val346Met)	missense	390	0.497	Step 1
1	7:2580994	BRAT1	NM_152743.4	c.1259C>T	p.(Ala420Val)	missense	202	0.495	Step 1
1	15:44864940	SPG11	NM_025137.4	c.6284T>C	p.(Leu2095Ser)	missense	246	0.459	Step 1
1	5:55204174	IL31RA	NM_139017.7	c.1436G>A	p.(Ser479Asn)	missense	351	0.415	Step 1
1	8:55538008	RP1	NM_006269.2	c.1566C>G	p.(Asn522Lys)	missense	414	0.516	Step 1
1	10:60560050	BICC1	NM_001080512.3	c.1822T>C	p.(Ser608Pro)	missense	293	0.436	Step 1
1	9:135946849	CEL	NM_001807.6	c.1960T>G	p.(Ser654Ala)	missense	34	0.424	Step 1
1	9:135946855	CEL	NM_001807.6	c.1966G>C	p.(Ala656Pro)	missense	39	0.368	Step 1
1	9:135946948	CEL	NM_001807.6	c.2059T>G	p.(Ser687Ala)	missense	100	0.363	Step 1
1	19:10472843	TYK2	NM_003331.5	c.1684A>C	p.(Ile562Leu)	missense	261	0.122	Step 1
1	7:117171053	CFTR	NM_000492.4	c.374T>C	p.(Ile125Thr)	missense	375	0.512	Step 1
2	1:43212885	P3H1	NM_022356.4	c.2055+58C>T		noncoding	476	0.495	Step 1 and 2
2	10:97444373	TCTN3	NM_015631.6	c.978T>G	p.(Tyr326Ter)	nonsense	135	0.162	Step 1 and 2
2	8:94768006	TMEM67	NM_153704.6	c.224G>A	p.(Gly75Glu)	missense	37	0.297	Step 1 and 2
2	16:3646168	SLX4	NM_032444.4	c.1910C>T	p.(Ser637Leu)	missense	250	0.5	Step 1 and 2
2	17:48265980	COL1A1	NM_000088.4	c.3118G>A	p.(Gly1040Ser)	missense	283	0.459	Step 1,2 and 3
2	17:48265282	COL1A1	NM_000088.4	c.3324G>C	p.(Lys1108Asn)	missense	468	0.508	Step 1 and 2
2	2:15427240	NBAS	NM_015909.4	c.5095G>A	p.(Glu1699Lys)	missense	141	0.517	Step 1
2	14:105676919	BRF1	NM_001519.4	c.2003G>A	p.(Gly668Asp)	missense	83	0.566	Step 1
2	11:68192694	LRP5	NM_002335.4	c.3361A>G	p.(Asn1121Asp)	missense	449	0.461	Step 1
2	22:28194598	MN1	NM_002430.3	c.1934G>A	p.(Arg645His)	missense	377	0.469	Step 1
2	19:42874974	MEGF8	NM_001271938.2	c.7127A>C	p.(Lys2376Thr)	missense	48	0.291	Step 1
2	19:42855576	MEGF8	NM_001271938.2	c.2856-5C>A		noncoding	489	0.521	Step 1
2	20:45353991	SLC2A10	NM_030777.4	c.316G>A	p.(Ala106Thr)	missense	779	0.513	Step 1
2	18:24039893	KCTD1	NM_001142730.3	c.2134-5dup		noncoding	162	0.506	Step 1
2	17:78063947	CCDC40	NM_017950.4	c.2832+264_2832+265insC		noncoding	117	0.239	Step 1
2	17:78024041	CCDC40	NM_017950.4	c.1118A>G	p.(Tyr373Cys)	missense	217	0.52	Step 1
2	14:102912270	TECPR2	NM_014844.5	c.3061G>A	p.(Asp1021Asn)	missense	113	0.46	Step 1
2	22:50664604	TUBGCP6	NM_020461.4	c.1708A>T	p.(Thr570Ser)	missense	228	0.495	Step 1
2	22:41531862	EP300	NM_001429.4	c.1574C>T	p.(Pro525Leu)	missense	160	0.518	Step 1
2	14:64920490	MTHFD1	NM_005956.4	c.2476A>G	p.(Ile826Val)	missense	138	0.514	Step 1
2	19:15281611	NOTCH3	NM_000435.3	c.4762A>C	p.(Asn1588His)	missense	148	0.189	Step 1
2	19:13221086	TRMT1	NM_001136035.4	c.905G>A	p.(Arg302His)	missense	136	0.441	Step 1
2	19:3633463	PIP5K1C	NM_012398.3	c.1976C>T	p.(Pro659Leu)	missense	281	0.516	Step 1
2	19:1462181	APC2	NM_005883.3	c.1853+6_1853+7insGGGCCCCCCCCCCCCCCCC		noncoding	459	0.074	Step 1
2	12:7045891	ATN1	NM_001940.4	c.1485_1508del	p.(Gln495_Gln502del)	inframe	347	0.638	Step 1
2	13:23914263	SACS	NM_014363.6	c.3752T>C	p.(Ile1251Thr)	missense	276	0.496	Step 1
2	9:126139322	CRB2	NM_173689.7	c.3839C>T	p.(Pro1280Leu)	missense	185	0.497	Step 1
2	9:126132458	CRB2	NM_173689.7	c.1126A>G	p.(Thr376Ala)	missense	328	0.509	Step 1
2	10:27009292	PDSS1	NM_014317.5	c.609+4T>C		noncoding	73	0.616	Step 1
2	11:1268488	MUC5B	NM_002458.3	c.10378C>T	p.(Pro3460Ser)	missense	3048	0.16	Step 1
2	11:1264717	MUC5B	NM_002458.3	c.6607C>T	p.(Pro2203Ser)	missense	335	0.167	Step 1
2	7:142460750	PRSS1	NM_002769.5	c.623G>C	p.(Gly208Ala)	missense	115	0.46	Step 1
2	8:144990503	PLEC	NM_201384.3	c.13486G>A	p.(Gly4496Ser)	missense	441	0.496	Step 1
2	6:143784138	PEX3	NM_003630.3	c.287+4A>G		noncoding	76	0.447	Step 1
2	5:37226961	CPLANE1	NM_001384732.1	c.1736C>T	p.(Ala579Val)	missense	260	0.392	Step 1
2	7:107580458	LAMB1	NM_002291.3	c.3737T>C	p.(Ile1246Thr)	missense	365	0.531	Step 1
2	10:105794044	COL17A1	NM_000494.4	c.3815C>T	p.(Pro1272Leu)	missense	347	0.495	Step 1
2	5:13719123	DNAH5	NM_001369.3	c.12367C>T	p.(His4123Tyr)	missense	254	0.448	Step 1
2	4:186334903	UFSP2	NM_018359.5	c.808C>T	p.(Pro270Ser)	missense	104	0.451	Step 1
2	6:52883264	CILK1	NM_014920.5	c.527A>G	p.(Asn176Ser)	missense	217	0.47	Step 1
2	4:110685853	CFI	NM_000204.5	c.329-8del		noncoding	90	0.555	Step 1
2	6:31762928	VARS1	NM_006295.3	c.67C>T	p.(Arg23Cys)	missense	168	0.571	Step 1
2	2:179315143	PRKRA	NM_003690.5	c.66-6_66-5insCTCGCCATGTCCCAGAGCAGGCACCGCGCCGAGGCCCCGCCGCTGGAGCGCGAGGACAG		noncoding	310	0.19	Step 1
2	2:179315141	PRKRA	NM_003690.5	c.66-4_66-3insGGACCTT		noncoding	318	0.213	Step 1
2	2:152359319	NEB	NM_001164508.2	c.23916G>C	p.(Glu7972Asp)	missense	223	0.358	Step 1
2	1:205138952	DSTYK	NM_015375.3	c.663C>A	p.(Asp221Glu)	missense	178	0.455	Step 1
2	1:27105773	ARID1A	NM_006015.6	c.5384A>G	p.(Lys1795Arg)	missense	230	0.482	Step 1
2	1:27057908	ARID1A	NM_006015.6	c.1616C>T	p.(Ser539Leu)	missense	680	0.508	Step 1
2	20:25057191	VSX1	NM_014588.6	c.809-6del		noncoding	238	0.145	Step 1
2	X:110555863	DCX	NM_001195553.2	c.1044+4T>C		noncoding	212	0.481	Step 1
2	20:62046400	KCNQ2	NM_172107.4	c.1381C>G	p.(Gln461Glu)	missense	421	0.451	Step 1
2	15:89865024	POLG	NM_002693.3	c.2541C>T	p.(Ala847=)	synonymous	313	0.453	Step 1
2	7:21813479	DNAH11	NM_001277115.2	c.9198C>G	p.(His3066Gln)	missense	173	0.439	Step 1
2	7:5780933	RNF216	NM_207111.4	c.715A>C	p.(Asn239His)	missense	434	0.465	Step 1
2	10:134598777	NKX6-2	NM_177400.3	c.579+7G>A		noncoding	510	0.529	Step 1
2	8:49831413	SNAI2	NM_003068.5	c.760T>A	p.(Ser254Thr)	missense	273	0.498	Step 1
2	5:94859387	SKIC3	NM_014639.4	c.1604T>C	p.(Val535Ala)	missense	161	0.527	Step 1
2	4:39511530	UGDH	NM_003359.4	c.664-4del		noncoding	135	0.483	Step 1
2	4:39304736	RFC1	NM_002913.5	c.2146C>G	p.(Leu716Val)	missense	113	0.486	Step 1
2	3:38647482	SCN5A	NM_000335.5	c.1298G>A	p.(Arg433His)	missense	372	0.465	Step 1
2	1:5940198	NPHP4	NM_015102.5	c.2587C>A	p.(Leu863Ile)	missense	148	0.506	Step 1
2	16:2036003	GFER	NM_005262.3	c.592G>A	p.(Gly198Ser)	missense	173	0.393	Step 1
2	16:30749342	SRCAP	NM_006662.3	c.7981G>A	p.(Asp2661Asn)	missense	663	0.475	Step 1
2	22:36653180	APOL1	NM_003661.4	c.96G>A	p.(Ala32=)	synonymous	182	0.56	Step 1
2	17:36483829	GPR179	NM_001004334.4	c.5623A>G	p.(Ile1875Val)	missense	665	0.488	Step 1
2	20:60909322	LAMA5	NM_005560.6	c.2659C>T	p.(His887Tyr)	missense	346	0.502	Step 1
2	18:47563212	MYO5B	NM_001080467.3	c.455+8T>C		noncoding	202	0.49	Step 1
2	18:44184064	LOXHD1	NM_001384474.1	c.883+5A>C		noncoding	189	0.539	Step 1
2	20:44536337	PLTP	NM_006227.4	c.607G>A	p.(Val203Met)	missense	1255	0.442	Step 1
2	17:79767758	GCGR	NM_000160.5	c.161C>G	p.(Thr54Arg)	missense	183	0.562	Step 1
2	17:6374559	PITPNM3	NM_031220.4	c.1546C>T	p.(Arg516Trp)	missense	275	0.44	Step 1
2	17:61678533	TACO1	NM_016360.4	c.91G>A	p.(Asp31Asn)	missense	310	0.551	Step 1
2	19:13054574	CALR	NM_004343.4	c.1102_1104del	p.(Lys368del)	inframe	216	0.476	Step 1
2	17:40932753	WNK4	NM_032387.5	c.37A>G	p.(Met13Val)	missense	356	0.46	Step 1
2	19:4816936	TICAM1	NM_182919.4	c.1454G>A	p.(Cys485Tyr)	missense	471	0.464	Step 1
2	12:57571380	LRP1	NM_002332.3	c.4361+6C>T		noncoding	182	0.467	Step 1
2	15:65943127	SLC24A1	NM_004727.3	c.2658_2660del	p.(Glu890del)	inframe	104	0.105	Step 1
2	14:24550555	NRL	NM_001354768.3	c.604C>T	p.(Arg202Trp)	missense	203	0.566	Step 1
2	12:38710703	ALG10B	NM_001013620.4	c.11_32del	p.(Leu4ProfsTer3)	frameshift	499	0.297	Step 1
2	9:135946920	CEL	NM_001807.6	c.2040del	p.(Val681CysfsTer23)	frameshift	408	0.345	Step 1
2	9:123722525	C5	NM_001735.3	c.4678+1G>A		splice	165	0.387	Step 1
2	8:10467591	RP1L1	NM_178857.6	c.3971_4016del	p.(Glu1324GlyfsTer18)	frameshift	1369	0.067	Step 1
2	8:10467586	RP1L1	NM_178857.6	c.4020_4021del	p.(Glu1340AspfsTer2)	frameshift	706	0.141	Step 1
2	10:127462696	MMP21	NM_147191.1	c.401C>T	p.(Pro134Leu)	missense	167	0.658	Step 1
2	7:95814274	SLC25A13	NM_014251.3	c.983C>T	p.(Ser328Leu)	missense	192	0.411	Step 1
2	5:40947795	C7	NM_000587.4	c.830G>C	p.(Trp277Ser)	missense	247	0.461	Step 1
2	6:10804051	MAK	NM_001242957.3	c.565A>G	p.(Ile189Val)	missense	184	0.456	Step 1
2	6:74073333	KHDC3L	NM_001017361.3	c.404G>A	p.(Arg135Gln)	missense	628	0.504	Step 1
2	5:178413235	GRM6	NM_000843.4	c.2020C>T	p.(Arg674Cys)	missense	468	0.5	Step 1
2	6:52317555	EFHC1	NM_018100.4	c.643C>T	p.(Leu215Phe)	missense	163	0.521	Step 1
2	5:135388589	TGFBI	NM_000358.3	c.914-7A>C		noncoding	148	0.445	Step 1
2	6:46682234	PLA2G7	NM_005084.4	c.433C>T	p.(Pro145Ser)	missense	111	0.414	Step 1
2	2:233684598	GIGYF2	NM_001103146.3	c.2432A>C	p.(Glu811Ala)	missense	84	0.511	Step 1
2	4:81123476	PRDM8	NM_001099403.2	c.860G>C	p.(Ser287Thr)	missense	441	0.485	Step 1
2	4:71347218	MUC7	NM_152291.3	c.757G>C	p.(Ala253Pro)	missense	2613	0.521	Step 1
2	3:47034017	NBEAL2	NM_015175.3	c.1085G>A	p.(Arg362Gln)	missense	262	0.545	Step 1
2	2:211504756	CPS1	NM_001875.5	c.2932G>A	p.(Val978Met)	missense	129	0.387	Step 1
2	4:2930017	ADD1	NM_001354761.2	c.2167G>A	p.(Glu723Lys)	missense	304	0.519	Step 1
2	4:1348573	UVSSA	NM_020894.4	c.985G>T	p.(Ala329Ser)	missense	250	0.456	Step 1
2	3:66312578	SLC25A26	NM_001379210.1	c.404A>G	p.(Glu135Gly)	missense	133	0.511	Step 1
2	2:26699756	OTOF	NM_194248.3	c.2676+3G>A		noncoding	277	0.541	Step 1
2	3:171406672	PLD1	NM_002662.5	c.1339-6C>T		noncoding	192	0.505	Step 1
2	1:55464875	BSND	NM_057176.3	c.16A>G	p.(Thr6Ala)	missense	268	0.432	Step 1
2	18:43534655	EPG5	NM_020964.3	c.713G>A	p.(Arg238His)	missense	316	0.458	Step 1
2	7:82578893	PCLO	NM_033026.6	c.11011A>G	p.(Thr3671Ala)	missense	402	0.492	Step 1
2	2:179659681	TTN	NM_001267550.2	c.1213G>A	p.(Ala405Thr)	missense	312	0.439	Step 1
2	2:73747095	ALMS1	NM_001378454.1	c.9730G>A	p.(Ala3244Thr)	missense	154	0.467	Step 1
2	X:99925956	SRPX2	NM_014467.3	c.1370G>A	p.(Arg457His)	missense	157	0.394	Step 1
2	20:47990436	KCNB1	NM_004975.4	c.1661G>A	p.(Ser554Asn)	missense	394	0.515	Step 1
2	8:61654539	CHD7	NM_017780.4	c.548C>T	p.(Pro183Leu)	missense	432	0.553	Step 1
2	16:2506749	CCNF	NM_001761.3	c.2089G>A	p.(Val697Ile)	missense	400	0.477	Step 1
2	16:2155922	PKD1	NM_001009944.3	c.7807G>T	p.(Ala2603Ser)	missense	273	0.454	Step 1
2	16:2155445	PKD1	NM_001009944.3	c.7894C>T	p.(Pro2632Ser)	missense	295	0.454	Step 1
2	17:56692702	TEX14	NM_031272.5	c.772G>C	p.(Val258Leu)	missense	252	0.523	Step 1
2	12:50358796	AQP5	NM_001651.4	c.634G>A	p.(Val212Met)	missense	294	0.421	Step 1
2	1:152283199	FLG	NM_002016.2	c.4163G>A	p.(Arg1388Gln)	missense	1156	0.497	Step 1
3	8:103250919	RRM2B	NM_015713.5	c.48+136G>A		noncoding	453	0.505	Step 1 and 2
3	21:34954486	DONSON	NM_017613.4	c.1031G>A	p.(Ser344Asn)	missense	200	0.4	Step 1 and 2
3	8:100791168	VPS13B	NM_152564.5	c.7688T>G	p.(Leu2563Arg)	missense	280	0.439	Step 1 and 2
3	1:22206742	HSPG2	NM_005529.7	c.2201C>G	p.(Pro734Arg)	missense	280	0.521	Step 1 and 2
3	1:22186498	HSPG2	NM_005529.7	c.5015-3C>T		noncoding	250	0.464	Step 1 and 2
3	21:47821511	PCNT	NM_006031.6	c.4838C>T	p.(Ala1613Val)	missense	200	0.43	Step 1 and 2
3	5:64103419	CWC27	NM_005869.4	c.938+3206T>C		noncoding	244	0.487	Step 1 and 2
3	3:33063063	GLB1	NM_000404.4	c.1228A>C	p.(Lys410Gln)	missense	112	0.508	Step 1 and 2
3	15:101549121	LRRK1	NM_024652.6	c.842C>T	p.(Thr281Met)	missense	447	0.485	Step 1 and 2
3	7:94056948	COL1A2	NM_000089.4	c.3277G>A	p.(Gly1093Ser)	missense	398	0.492	Step 1,2 and 3
3	20:45317888	TP53RK	NM_033550.4	c.166G>C	p.(Ala56Pro)	missense	285	0.484	Step 1
3	20:18492883	SEC23B	NM_006363.6	c.236G>A	p.(Arg79Gln)	missense	100	0.42	Step 1
3	22:24720250	SPECC1L	NM_015330.6	c.2001G>A	p.(Met667Ile)	missense	98	0.459	Step 1
3	19:47980152	KPTN	NM_007059.4	c.907G>A	p.(Gly303Ser)	missense	319	0.523	Step 1
3	19:2114123	AP3D1	NM_001261826.3	c.2601+1G>C		splice	283	0.169	Step 1
3	17:80772716	TBCD	NM_005993.5	c.1224T>C	p.(Ser408=)	synonymous	317	0.536	Step 1
3	14:102496150	DYNC1H1	NM_001376.5	c.9643-6C>T		noncoding	159	0.509	Step 1
3	19:36214675	KMT2B	NM_014727.3	c.3101A>C	p.(Glu1034Ala)	missense	190	0.136	Step 1
3	17:48152873	ITGA3	NM_002204.4	c.1520A>C	p.(Asn507Thr)	missense	467	0.488	Step 1
3	19:12775671	MAN2B1	NM_000528.4	c.565C>A	p.(Pro189Thr)	missense	246	0.487	Step 1
3	19:11170868	SMARCA4	NM_003072.5	c.4911+5G>A		noncoding	116	0.413	Step 1
3	16:88786226	PIEZO1	NM_001142864.4	c.6307C>G	p.(Leu2103Val)	missense	453	0.483	Step 1
3	15:67003998	SMAD6	NM_005585.5	c.818-8T>C		noncoding	250	0.496	Step 1
3	15:51223090	AP4E1	NM_007347.5	c.791A>G	p.(Asn264Ser)	missense	188	0.505	Step 1
3	11:73789451	C2CD3	NM_001286577.2	c.4312C>T	p.(Arg1438Cys)	missense	492	0.465	Step 1
3	12:6626172	NCAPD2	NM_014865.4	c.1166C>T	p.(Thr389Ile)	missense	256	0.515	Step 1
3	13:23898507	SGCG	NM_000231.3	c.703C>T	p.(Leu235Phe)	missense	216	0.425	Step 1
3	11:134037940	NCAPD3	NM_015261.3	c.3524C>T	p.(Ala1175Val)	missense	330	0.439	Step 1
3	11:57569243	CTNND1	NM_001085458.2	c.995A>G	p.(Asp332Gly)	missense	227	0.409	Step 1
3	12:105540893	WASHC4	NM_015275.3	c.2483G>A	p.(Arg828Gln)	missense	67	0.477	Step 1
3	9:35548085	RUSC2	NM_014806.5	c.1567C>T	p.(Arg523Cys)	missense	624	0.506	Step 1
3	8:145024784	PLEC	NM_201378.4	c.71-11924C>T		noncoding	479	0.486	Step 1
3	8:144997382	PLEC	NM_201384.3	c.6715G>T	p.(Glu2239Ter)	nonsense	609	0.499	Step 1
3	8:144997381	PLEC	NM_201384.3	c.6716A>T	p.(Glu2239Val)	missense	607	0.497	Step 1
3	8:144993356	PLEC	NM_201384.3	c.10631_10632del	p.(Lys3544ArgfsTer6)	frameshift	762	0.475	Step 1
3	6:157100116	ARID1B	NM_001374828.1	c.1318_1320del	p.(Gly440del)	inframe	124	0.08	Step 1
3	7:82585003	PCLO	NM_033026.6	c.5266C>G	p.(Arg1756Gly)	missense	603	0.49	Step 1
3	6:129835506	LAMA2	NM_000426.4	c.8989-12C>G		noncoding	304	0.5	Step 1
3	6:129687418	LAMA2	NM_000426.4	c.4772A>G	p.(Gln1591Arg)	missense	246	0.471	Step 1
3	5:37226961	CPLANE1	NM_001384732.1	c.1736C>T	p.(Ala579Val)	missense	215	0.516	Step 1
3	10:105798873	COL17A1	NM_000494.4	c.2903C>T	p.(Pro968Leu)	missense	102	0.382	Step 1
3	5:13919279	DNAH5	NM_001369.3	c.975+6C>T		noncoding	278	0.514	Step 1
3	5:78135226	ARSB	NM_000046.5	c.1166T>C	p.(Ile389Thr)	missense	228	0.513	Step 1
3	6:31323175	HLA-B	NM_005514.8	c.814G>A	p.(Val272Met)	missense	87	0.126	Step 1
3	6:31239113	HLA-C	NM_002117.6	c.354_355del	p.(Leu119ProfsTer19)	frameshift	187	0.139	Step 1
3	2:220337618	SPEG	NM_005876.5	c.3947A>C	p.(Asp1316Ala)	missense	119	0.579	Step 1
3	2:179634520	TTN	NM_001267550.2	c.8788G>A	p.(Val2930Ile)	missense	307	0.452	Step 1
3	2:179613112	TTN	NM_001267550.2	c.11311+4739C>T		noncoding	536	0.486	Step 1
3	2:179315141	PRKRA	NM_003690.5	c.66-4_66-3insAGCCGTCCCTTCTCGCCCTGTCCCAGAGCAGGCACCGCCGAGGCCCCGCCGCTGGAGCGCGAGGACAGTGGGACCTT		noncoding	359	0.211	Step 1
3	1:161047504	NECTIN4	NM_030916.3	c.469C>G	p.(Pro157Ala)	missense	230	0.447	Step 1
3	1:64104434	PGM1	NM_002633.3	c.1107C>A	p.(Ser369Arg)	missense	442	0.481	Step 1
3	1:45808174	TOE1	NM_025077.4	c.611A>G	p.(Tyr204Cys)	missense	447	0.505	Step 1
3	1:2237461	SKI	NM_003036.4	c.1770G>A	p.(Glu590=)	synonymous	123	0.504	Step 1
3	9:116154502	ALAD	NM_000031.6	c.114-53A>C		noncoding	384	0.382	Step 1
3	10:50828563	CHAT	NM_020549.5	c.602A>G	p.(Asp201Gly)	missense	515	0.481	Step 1
3	7:40277288	SUGCT	NM_001193313.2	c.539C>T	p.(Ser180Leu)	missense	338	0.488	Step 1
3	8:133899149	TG	NM_003235.5	c.1532A>G	p.(Asn511Ser)	missense	411	0.503	Step 1
3	6:43638551	RSPH9	NM_152732.5	c.696G>A	p.(Arg232=)	synonymous	332	0.599	Step 1
3	3:43121854	POMGNT2	NM_032806.6	c.1070G>A	p.(Arg357His)	missense	512	0.49	Step 1
3	3:38182249	MYD88	NM_002468.5	c.646T>A	p.(Cys216Ser)	missense	274	0.503	Step 1
3	1:158622442	SPTA1	NM_003126.4	c.3190T>C	p.(Tyr1064His)	missense	181	0.458	Step 1
3	1:68910517	RPE65	NM_000329.3	c.295G>A	p.(Val99Ile)	missense	259	0.459	Step 1
3	2:105472687	POU3F3	NM_006236.3	c.737_739del	p.(Gly246del)	inframe	103	0.106	Step 1
3	22:46859900	CELSR1	NM_001378328.1	c.3887C>T	p.(Thr1296Met)	missense	560	0.476	Step 1
3	17:40004486	KLHL10	NM_152467.5	c.1754G>A	p.(Arg585Gln)	missense	305	0.465	Step 1
3	21:34668649	IL10RB	NM_000628.5	c.965G>A	p.(Gly322Glu)	missense	233	0.515	Step 1
3	17:18071006	MYO15A	NM_016239.4	c.10051C>T	p.(Arg3351Cys)	missense	163	0.441	Step 1
3	17:78346951	RNF213	NM_001256071.3	c.12928G>A	p.(Val4310Ile)	missense	334	0.416	Step 1
3	16:2499888	CCNF	NM_001761.3	c.1459C>T	p.(Pro487Ser)	missense	154	0.558	Step 1
3	17:73827386	UNC13D	NM_199242.3	c.2491G>A	p.(Glu831Lys)	missense	347	0.478	Step 1
3	14:92537397	ATXN3	NM_004993.6	c.873-1_873insCAGCAGCAGCAGCAGCAGCAGCAGCAGCAGCAGC	p.(Lys291AsnfsTer38)	frameshift	75	0.213	Step 1
3	19:17086968	CPAMD8	NM_015692.5	c.1759-7C>T		noncoding	175	0.428	Step 1
3	19:14863220	ADGRE2	NM_013447.4	c.1709C>A	p.(Ser570Ter)	nonsense	221	0.511	Step 1
3	19:11287493	KANK2	NM_001136191.3	c.1521G>T	p.(Gly507=)	synonymous	387	0.475	Step 1
3	16:57007325	CETP	NM_000078.3	c.833T>G	p.(Leu278Arg)	missense	446	0.527	Step 1
3	14:52794023	PTGER2	NM_000956.4	c.932_938del	p.(Asp311GlyfsTer11)	frameshift	295	0.413	Step 1
3	13:111155786	COL4A2	NM_001846.4	c.4096G>A	p.(Asp1366Asn)	missense	333	0.486	Step 1
3	12:9006820	A2ML1	NM_144670.6	c.2687C>T	p.(Thr896Met)	missense	339	0.439	Step 1
3	11:67287257	CABP2	NM_016366.3	c.637+7C>G		noncoding	555	0.522	Step 1
3	10:60148569	TFAM	NM_003201.3	c.441del	p.(Glu148SerfsTer2)	frameshift	59	0.142	Step 1
3	12:112036798	ATXN2	NM_001372574.1	c.39_40del	p.(Gln14AlafsTer75)	frameshift	108	0.12	Step 1
3	12:112036796	ATXN2	NM_001372574.1	c.42del	p.(Gln14HisfsTer32)	frameshift	106	0.122	Step 1
3	8:10467457	RP1L1	NM_178857.6	c.4151G>C	p.(Gly1384Ala)	missense	1213	0.202	Step 1
3	9:77455097	TRPM6	NM_017662.5	c.387A>T	p.(Lys129Asn)	missense	230	0.447	Step 1
3	7:114270030	FOXP2	NM_014491.4	c.570_572del	p.(Gln191del)	inframe	54	0.092	Step 1
3	7:144096531	NOBOX	NM_001080413.3	c.1199C>T	p.(Pro400Leu)	missense	179	0.474	Step 1
3	7:47840450	PKD1L1	NM_138295.5	c.7990C>G	p.(Leu2664Val)	missense	322	0.465	Step 1
3	4:177713372	VEGFC	NM_005429.5	c.91_93del	p.(Ala31del)	inframe	103	0.106	Step 1
3	6:76599857	MYO6	NM_004999.4	c.2751dup	p.(Gln918ThrfsTer24)	frameshift	104	0.156	Step 1
3	6:70500319	LMBRD1	NM_018368.4	c.115C>T	p.(Arg39Trp)	missense	251	0.466	Step 1
3	5:176943453	DDX41	NM_016222.4	c.139-5C>T		noncoding	300	0.483	Step 1
3	8:17500179	PDGFRL	NM_001372073.1	c.997C>T	p.(His333Tyr)	missense	185	0.47	Step 1
3	4:114276601	ANK2	NM_001148.6	c.6827A>G	p.(Glu2276Gly)	missense	257	0.544	Step 1
3	6:36270248	PNPLA1	NM_001374623.1	c.1384+2T>C		splice	400	0.44	Step 1
3	6:35922970	SLC26A8	NM_052961.4	c.2191G>A	p.(Val731Ile)	missense	417	0.484	Step 1
3	2:233389065	PRSS56	NM_001195129.2	c.1400G>A	p.(Arg467His)	missense	326	0.466	Step 1
3	3:47042552	NBEAL2	NM_015175.3	c.4367G>A	p.(Arg1456His)	missense	390	0.417	Step 1
3	2:227967506	COL4A4	NM_000092.5	c.929G>A	p.(Arg310Gln)	missense	166	0.463	Step 1
3	2:11916326	LPIN1	NM_001349206.2	c.830+7G>A		noncoding	182	0.483	Step 1
3	2:11817789	LPIN1	NM_001261428.3	c.16G>A	p.(Gly6Ser)	missense	139	0.589	Step 1
3	2:157182438	NR4A2	NM_006186.4	c.1615G>A	p.(Val539Met)	missense	457	0.481	Step 1
3	1:91405998	ZNF644	NM_201269.3	c.913G>A	p.(Glu305Lys)	missense	428	0.485	Step 1
3	1:63005502	DOCK7	NM_001367561.1	c.3107G>T	p.(Arg1036Leu)	missense	110	0.372	Step 1
3	1:120307179	HMGCS2	NM_005518.4	c.175C>A	p.(Leu59Met)	missense	428	0.434	Step 1
3	22:26299658	MYO18B	NM_032608.7	c.5008C>T	p.(Arg1670Trp)	missense	266	0.492	Step 1
3	19:1469959	APC2	NM_005883.3	c.6659G>A	p.(Gly2220Asp)	missense	412	0.509	Step 1
3	1:1277469	DVL1	NM_001330311.2	c.430C>T	p.(Arg144Trp)	missense	280	0.475	Step 1
3	19:42911883	LIPE	NM_005357.4	c.1717G>A	p.(Glu573Lys)	missense	430	0.523	Step 1
3	19:42906851	LIPE	NM_005357.4	c.2875C>T	p.(Leu959Phe)	missense	656	0.506	Step 1
3	16:2160687	PKD1	NM_001009944.3	c.4481G>A	p.(Arg1494His)	missense	653	0.491	Step 1
3	19:38631868	SIPA1L3	NM_015073.3	c.3188C>T	p.(Thr1063Met)	missense	340	0.452	Step 1
3	11:65792763	CATSPER1	NM_053054.4	c.1088T>C	p.(Met363Thr)	missense	925	0.482	Step 1
3	11:17582266	OTOG	NM_001292063.2	c.1353C>A	p.(Phe451Leu)	missense	289	0.446	Step 1
3	9:80866955	CEP78	NM_001330691.3	c.1201C>G	p.(His401Asp)	missense	228	0.491	Step 1
3	8:55542002	RP1	NM_006269.2	c.5560G>A	p.(Glu1854Lys)	missense	296	0.432	Step 1
3	2:239161644	PER2	NM_022817.3	c.3020T>C	p.(Met1007Thr)	missense	663	0.49	Step 1
3	1:152278188	FLG	NM_002016.2	c.9174T>A	p.(His3058Gln)	missense	371	0.838	Step 1
3	1:152275832	FLG	NM_002016.2	c.11530C>G	p.(Gln3844Glu)	missense	1531	0.459	Step 1
3	1:152082376	TCHH	NM_007113.4	c.3317G>T	p.(Arg1106Leu)	missense	1706	0.112	Step 1
3	1:152082364	TCHH	NM_007113.4	c.3329G>A	p.(Cys1110Tyr)	missense	1675	0.135	Step 1
4	6:35199499	SCUBE3	NM_152753.4	c.335-3C>T		noncoding	49	0.469	Step 1 and 2
4	2:20132090	WDR35	NM_020779.4	c.2777A>G	p.(Tyr926Cys)	missense	98	0.428	Step 1 and 2
4	2:220422981	OBSL1	NM_015311.3	c.3427G>A	p.(Ala1143Thr)	missense	162	0.481	Step 1 and 2
4	1:176563860	PAPPA2	NM_020318.3	c.1120C>T	p.(Arg374Trp)	missense	128	0.578	Step 1 and 2
4	21:43161206	RIPK4	NM_020639.3	c.2147C>T	p.(Ser716Leu)	missense	192	0.562	Step 1 and 2
4	20:44045240	PIGT	NM_015937.6	c.271C>G	p.(Gln91Glu)	missense	130	0.43	Step 1 and 2
4	11:93844969	HEPHL1	NM_001098672.2	c.3389C>T	p.(Thr1130Met)	missense	83	0.361	Step 1 and 2
4	7:94045753	COL1A2	NM_000089.4	c.1801G>A	p.(Gly601Ser)	missense	73	0.63	Step 1,2 and 3
4	9:113550123	MUSK	NM_005592.4	c.1927+9dup		noncoding	83	0.614	Step 1
4	14:45657020	FANCM	NM_020937.4	c.4709G>A	p.(Arg1570His)	missense	29	0.448	Step 1
4	X:25031673	ARX	NM_139058.3	c.439G>C	p.(Ala147Pro)	missense	41	0.384	Step 1
4	19:39055797	RYR1	NM_000540.3	c.12823G>A	p.(Ala4275Thr)	missense	64	0.531	Step 1
4	22:40704639	TNRC6B	NM_001162501.2	c.4244A>G	p.(Asn1415Ser)	missense	114	0.482	Step 1
4	20:30898082	KIF3B	NM_004798.4	c.502G>A	p.(Glu168Lys)	missense	75	0.586	Step 1
4	21:47628179	LSS	NM_002340.6	c.1303C>T	p.(Arg435Cys)	missense	66	0.333	Step 1
4	17:78073435	CCDC40	NM_017950.4	c.3290G>A	p.(Arg1097His)	missense	106	0.405	Step 1
4	18:21441695	LAMA3	NM_198129.4	c.4508T>C	p.(Val1503Ala)	missense	127	0.409	Step 1
4	17:74097948	EXOC7	NM_001013839.4	c.127-4G>A		noncoding	62	0.451	Step 1
4	17:48692769	CACNA1G	NM_018896.5	c.4807C>T	p.(Leu1603Phe)	missense	107	0.364	Step 1
4	17:48676913	CACNA1G	NM_018896.5	c.3383G>A	p.(Arg1128Gln)	missense	133	0.458	Step 1
4	17:73269653	SLC25A19	NM_001126121.2	c.842T>G	p.(Phe281Cys)	missense	131	0.503	Step 1
4	17:46608197	HOXB1	NM_002144.4	c.70G>A	p.(Ala24Thr)	missense	90	0.433	Step 1
4	17:10302192	MYH8	NM_002472.3	c.3874C>T	p.(Arg1292Ter)	nonsense	42	0.547	Step 1
4	16:731843	STUB1	NM_005861.4	c.575A>G	p.(His192Arg)	missense	71	0.549	Step 1
4	16:1551776	TELO2	NM_016111.4	c.1472+2T>C		splice	139	0.446	Step 1
4	17:62018797	SCN4A	NM_000334.4	c.4845T>A	p.(Asp1615Glu)	missense	116	0.551	Step 1
4	16:89613170	SPG7	NM_003119.4	c.1552+4_1552+11dup		noncoding	60	0.633	Step 1
4	16:89341502	ANKRD11	NM_013275.6	c.7568G>A	p.(Arg2523Gln)	missense	101	0.514	Step 1
4	16:88793483	PIEZO1	NM_001142864.4	c.3419G>C	p.(Gly1140Ala)	missense	127	0.448	Step 1
4	17:37872088	ERBB2	NM_004448.4	c.1409A>G	p.(His470Arg)	missense	144	0.43	Step 1
4	17:36895091	PCGF2	NM_007144.3	c.340C>T	p.(Arg114Cys)	missense	41	0.414	Step 1
4	12:88570085	TMTC3	NM_181783.4	c.1421A>G	p.(His474Arg)	missense	78	0.512	Step 1
4	14:54417475	BMP4	NM_001202.6	c.502G>C	p.(Gly168Arg)	missense	86	0.441	Step 1
4	14:24724030	TGM1	NM_000359.3	c.1928C>T	p.(Ser643Leu)	missense	152	0.368	Step 1
4	13:35733945	NBEA	NM_001385012.1	c.3637A>G	p.(Thr1213Ala)	missense	93	0.526	Step 1
4	14:23887584	MYH7	NM_000257.4	c.4004C>T	p.(Ser1335Leu)	missense	176	0.494	Step 1
4	14:21838650	SUPT16H	NM_007192.4	c.331-3C>T		noncoding	59	0.457	Step 1
4	12:56487317	ERBB3	NM_001982.4	c.1463G>A	p.(Arg488Gln)	missense	87	0.482	Step 1
4	11:45832539	SLC35C1	NM_018389.5	c.748G>A	p.(Gly250Arg)	missense	148	0.445	Step 1
4	11:73796832	C2CD3	NM_001286577.2	c.3741G>C	p.(Gln1247His)	missense	116	0.534	Step 1
4	8:145582844	SLC52A2	NM_001363118.2	c.-110C>T		UTR	28	0.428	Step 1
4	10:29821465	SVIL	NM_021738.3	c.1831C>A	p.(Pro611Thr)	missense	100	0.56	Step 1
4	10:74987941	FAM149B1	NM_173348.2	c.1022C>T	p.(Pro341Leu)	missense	67	0.492	Step 1
4	10:74127990	MICU1	NM_001195518.2	c.1394A>G	p.(Gln465Arg)	missense	176	0.522	Step 1
4	8:140998968	TRAPPC9	NM_001160372.4	c.2776G>A	p.(Glu926Lys)	missense	66	0.378	Step 1
4	7:103629572	RELN	NM_005045.4	c.226+6T>C		noncoding	85	0.505	Step 1
4	7:66094158	KCTD7	NM_153033.5	c.107C>T	p.(Thr36Met)	missense	129	0.441	Step 1
4	6:13286468	PHACTR1	NM_030948.6	c.1727+24dup		noncoding	64	0.406	Step 1
4	4:186334902	UFSP2	NM_018359.5	c.809C>T	p.(Pro270Leu)	missense	66	0.424	Step 1
4	4:151203684	LRBA	NM_001364905.1	c.8234T>C	p.(Ile2745Thr)	missense	66	0.484	Step 1
4	4:56262491	TMEM165	NM_018475.5	c.135A>C	p.(Glu45Asp)	missense	158	0.341	Step 1
4	3:186299839	DNAJB11	NM_016306.6	c.655G>A	p.(Gly219Ser)	missense	64	0.375	Step 1
4	4:3498568	DOK7	NM_001301071.2	c.1519G>A	p.(Gly507Arg)	missense	55	0.509	Step 1
4	4:3142295	HTT	NM_001388492.1	c.2857G>C	p.(Val953Leu)	missense	78	0.474	Step 1
4	2:179642552	TTN	NM_001267550.2	c.4359A>T	p.(Arg1453Ser)	missense	138	0.471	Step 1
4	3:12983283	IQSEC1	NM_001134382.3	c.106G>A	p.(Gly36Ser)	missense	109	0.577	Step 1
4	2:220354208	SPEG	NM_005876.5	c.8468C>A	p.(Ser2823Tyr)	missense	72	0.5	Step 1
4	2:220354207	SPEG	NM_005876.5	c.8467T>C	p.(Ser2823Pro)	missense	72	0.5	Step 1
4	2:233199108	DIS3L2	NM_152383.5	c.2188G>A	p.(Asp730Asn)	missense	119	0.495	Step 1
4	2:8953395	KIDINS220	NM_020738.4	c.377A>T	p.(His126Leu)	missense	60	0.533	Step 1
4	1:154560739	ADAR	NM_001111.5	c.2886-5T>C		noncoding	121	0.578	Step 1
4	1:209801530	LAMB3	NM_000228.3	c.1138G>A	p.(Glu380Lys)	missense	73	0.493	Step 1
4	1:160091015	ATP1A2	NM_000702.4	c.151C>T	p.(Arg51Cys)	missense	72	0.388	Step 1
4	1:55337178	DHCR24	NM_014762.4	c.721C>T	p.(Arg241Cys)	missense	104	0.5	Step 1
4	X:66765228	AR	NM_000044.6	c.241dup	p.(Glu81GlyfsTer3)	frameshift	134	0.485	Step 1
4	X:66765227	AR	NM_000044.6	c.239_240insGC	p.(Glu81GlnfsTer95)	frameshift	132	0.477	Step 1
4	X:66765228	AR	NM_000044.6	c.240delinsGCAG	p.(Gln80dup)	inframe	64	0.388	Step 1
4	X:18972410	PHKA2	NM_000292.3	c.199C>T	p.(Arg67Cys)	missense	74	0.472	Step 1
4	X:18929045	PHKA2	NM_000292.3	c.2171G>C	p.(Ser724Thr)	missense	65	0.446	Step 1
4	19:50805047	MYH14	NM_001145809.2	c.5599C>T	p.(Arg1867Cys)	missense	90	0.477	Step 1
4	12:6076771	VWF	NM_000552.5	c.7771-3C>T		noncoding	51	0.47	Step 1
4	14:23993789	ZFHX2	NM_033400.3	c.5362C>T	p.(Arg1788Cys)	missense	190	0.473	Step 1
4	9:100616641	FOXE1	NM_004473.4	c.445T>C	p.(Phe149Leu)	missense	21	0.333	Step 1
4	4:84205949	COQ2	NM_001358921.2	c.-32C>T		UTR	131	0.419	Step 1
4	4:8869586	HMX1	NM_018942.3	c.880G>C	p.(Ala294Pro)	missense	104	0.288	Step 1
4	2:71827926	DYSF	NM_001130987.2	c.3851C>T	p.(Pro1284Leu)	missense	131	0.312	Step 1
4	1:216363654	USH2A	NM_206933.4	c.4307C>T	p.(Pro1436Leu)	missense	102	0.549	Step 1
4	1:100368318	AGL	NM_000642.3	c.3668G>A	p.(Gly1223Asp)	missense	64	0.531	Step 1
4	17:73775265	H3-3B	NM_005324.5	c.-10G>T		UTR	62	0.451	Step 1
4	7:38796433	VPS41	NM_014396.4	c.1695+5T>C		noncoding	34	0.382	Step 1
4	4:54966529	GSX2	NM_133267.3	c.18T>G	p.(Tyr6Ter)	nonsense	143	0.412	Step 1
4	4:54966528	GSX2	NM_133267.3	c.17A>T	p.(Tyr6Phe)	missense	141	0.411	Step 1
4	1:224302007	FBXO28	NM_015176.4	c.176C>T	p.(Pro59Leu)	missense	151	0.43	Step 1
4	X:36156484	CFAP47	NM_001304548.2	c.5438A>G	p.(Asn1813Ser)	missense	16	0.5	Step 1
4	22:51182600	ACR	NM_001097.3	c.677C>T	p.(Ala226Val)	missense	113	0.38	Step 1
4	19:55526219	GP6	NM_001083899.2	c.1094G>A	p.(Arg365His)	missense	82	0.56	Step 1
4	19:17952517	JAK3	NM_000215.4	c.916G>A	p.(Ala306Thr)	missense	131	0.351	Step 1
4	19:7810932	CD209	NM_021155.4	c.220C>T	p.(Gln74Ter)	nonsense	175	0.502	Step 1
4	18:44104823	LOXHD1	NM_001384474.1	c.4588C>T	p.(Arg1530Cys)	missense	131	0.427	Step 1
4	18:19429236	MIB1	NM_020774.4	c.2473A>G	p.(Met825Val)	missense	64	0.515	Step 1
4	17:76116858	TMC6	NM_001127198.5	c.1591C>T	p.(Arg531Cys)	missense	206	0.514	Step 1
4	17:67249934	ABCA5	NM_172232.4	c.4320+1G>T		splice	67	0.432	Step 1
4	16:72829935	ZFHX3	NM_006885.4	c.6646A>G	p.(Ile2216Val)	missense	220	0.463	Step 1
4	16:67208636	NOL3	NM_001276319.2	c.594C>G	p.(Ala198=)	synonymous	121	0.479	Step 1
4	14:95088683	SERPINA3	NM_001085.5	c.923T>C	p.(Ile308Thr)	missense	78	0.487	Step 1
4	16:48234330	ABCC11	NM_001370497.1	c.1939G>A	p.(Ala647Thr)	missense	109	0.495	Step 1
4	15:74220074	LOXL1	NM_005576.4	c.950C>T	p.(Pro317Leu)	missense	181	0.497	Step 1
4	15:73616140	HCN4	NM_005477.3	c.2294C>G	p.(Ala765Gly)	missense	135	0.444	Step 1
4	11:6587869	DNHD1	NM_144666.3	c.11259C>A	p.(Asn3753Lys)	missense	96	0.614	Step 1
4	11:78498033	TENM4	NM_001098816.3	c.2275G>A	p.(Ala759Thr)	missense	192	0.526	Step 1
4	10:26417450	MYO3A	NM_017433.5	c.2245G>A	p.(Val749Met)	missense	69	0.42	Step 1
4	11:66617481	PC	NM_001040716.2	c.2825G>A	p.(Arg942His)	missense	153	0.496	Step 1
4	9:133914293	LAMC3	NM_006059.4	c.1019G>A	p.(Arg340Gln)	missense	94	0.51	Step 1
4	7:135312726	NUP205	NM_015135.3	c.4799T>A	p.(Phe1600Tyr)	missense	86	0.36	Step 1
4	8:104330984	FZD6	NM_003506.4	c.344T>G	p.(Ile115Ser)	missense	37	0.459	Step 1
4	8:101157323	FBXO43	NM_001029860.4	c.41A>G	p.(Glu14Gly)	missense	53	0.509	Step 1
4	7:123301994	LMOD2	NM_207163.3	c.370_372dup	p.(Glu124dup)	inframe	51	0.333	Step 1
4	7:87214970	ABCB1	NM_001348946.2	c.144G>T	p.(Lys48Asn)	missense	76	0.434	Step 1
4	6:72892433	RIMS1	NM_014989.7	c.1259C>G	p.(Ser420Trp)	missense	104	0.432	Step 1
4	8:11705296	CTSB	NM_001908.5	c.568C>T	p.(His190Tyr)	missense	100	0.52	Step 1
4	7:47897420	PKD1L1	NM_138295.5	c.4373C>T	p.(Ser1458Phe)	missense	79	0.481	Step 1
4	5:146017939	PPP2R2B	NM_181675.4	c.665C>T	p.(Thr222Met)	missense	108	0.481	Step 1
4	7:44579068	NPC1L1	NM_001101648.2	c.927dup	p.(Ala310ArgfsTer18)	frameshift	159	0.471	Step 1
4	4:81124316	PRDM8	NM_001099403.2	c.1700G>C	p.(Gly567Ala)	missense	71	0.295	Step 1
4	5:156890119	NIPAL4	NM_001099287.2	c.55T>G	p.(Tyr19Asp)	missense	88	1	Step 1
4	5:82832882	VCAN	NM_004385.5	c.4060G>A	p.(Asp1354Asn)	missense	94	0.404	Step 1
4	4:156651348	GUCY1A1	NM_001130682.3	c.2038G>A	p.(Ala680Thr)	missense	55	0.345	Step 1
4	4:156835551	TDO2	NM_005651.4	c.803T>A	p.(Phe268Tyr)	missense	82	0.414	Step 1
4	5:35013126	AGXT2	NM_031900.4	c.1121G>A	p.(Cys374Tyr)	missense	81	0.444	Step 1
4	4:661655	PDE6B	NM_000283.4	c.2363G>A	p.(Arg788His)	missense	43	0.372	Step 1
4	3:33877696	PDCD6IP	NM_013374.6	c.995T>C	p.(Ile332Thr)	missense	47	0.319	Step 1
4	2:157183425	NR4A2	NM_006186.4	c.1166C>T	p.(Ala389Val)	missense	62	0.548	Step 1
4	2:113671389	IL37	NM_014439.4	c.103G>T	p.(Glu35Ter)	nonsense	67	0.417	Step 1
4	2:233697743	GIGYF2	NM_001103146.3	c.2706G>C	p.(Gln902His)	missense	103	0.601	Step 1
4	2:219249939	SLC11A1	NM_000578.4	c.343G>A	p.(Val115Met)	missense	98	0.479	Step 1
4	1:227069708	PSEN2	NM_000447.3	c.100G>A	p.(Gly34Ser)	missense	114	0.5	Step 1
4	2:29445249	ALK	NM_004304.5	c.3476A>T	p.(Gln1159Leu)	missense	61	0.377	Step 1
4	1:171763595	METTL13	NM_015935.5	c.1753A>C	p.(Met585Leu)	missense	156	0.493	Step 1
4	1:155264433	PKLR	NM_000298.6	c.805G>T	p.(Val269Phe)	missense	131	0.458	Step 1
4	1:186086254	HMCN1	NM_031935.3	c.11683+7T>C		noncoding	76	0.486	Step 1
4	1:118571007	SPAG17	NM_206996.4	c.3620T>C	p.(Val1207Ala)	missense	96	0.406	Step 1
4	1:156562419	NAXE	NM_144772.3	c.473G>C	p.(Cys158Ser)	missense	98	0.295	Step 1
4	1:1470819	TMEM240	NM_001114748.2	c.442T>C	p.(Phe148Leu)	missense	88	0.318	Step 1
4	15:40498525	BUB1B	NM_001211.6	c.1875A>G	p.(Ile625Met)	missense	99	0.494	Step 1
4	6:70951719	COL9A1	NM_001851.6	c.1946G>C	p.(Gly649Ala)	missense	97	0.443	Step 1
4	2:178592448	PDE11A	NM_016953.4	c.1981G>T	p.(Val661Phe)	missense	41	0.487	Step 1
4	11:125888269	CDON	NM_001378964.1	c.596A>G	p.(His199Arg)	missense	66	0.545	Step 1
4	1:3740070	CEP104	NM_014704.4	c.2421C>A	p.(Asp807Glu)	missense	95	0.41	Step 1
4	21:34621124	IFNAR2	NM_001289125.3	c.505G>A	p.(Val169Ile)	missense	54	0.537	Step 1
4	20:2375846	TGM6	NM_198994.3	c.188G>A	p.(Arg63Gln)	missense	179	0.463	Step 1
4	19:38631856	SIPA1L3	NM_015073.3	c.3176C>T	p.(Ser1059Leu)	missense	98	0.428	Step 1
4	6:161026078	LPA	NM_005577.4	c.2945C>T	p.(Ala982Val)	missense	140	0.414	Step 1
4	2:186657402	FSIP2	NM_173651.4	c.5539G>T	p.(Val1847Phe)	missense	51	0.549	Step 1
4	2:186620961	FSIP2	NM_173651.4	c.1034T>C	p.(Leu345Ser)	missense	54	0.296	Step 1
5	4:170321764	NEK1	NM_001199397.3	c.3622G>A	p.(Asp1208Asn)	missense	239	0.451	Step 1 and 2
5	6:33148754	COL11A2	NM_080680.3	c.1208C>T	p.(Pro403Leu)	missense	336	0.479	Step 1 and 2
5	19:1105715	GPX4	NM_002085.5	c.383A>G	p.(Asp128Gly)	missense	339	0.489	Step 1 and 2
5	12:20766413	PDE3A	NM_000921.5	c.1048A>G	p.(Met350Val)	missense	377	0.485	Step 1 and 2
5	7:94055771	COL1A2	NM_000089.4	c.3034G>A	p.(Gly1012Ser)	missense	336	0.482	Step 1,2 and 3
5	20:948592	RSPO4	NM_001029871.4	c.268dup	p.(Cys91MetfsTer6)	frameshift	271	0.546	Step 1
5	2:44065894	ABCG5	NM_022436.3	c.-76C>T		UTR	204	0.509	Step 1
5	2:48132847	FBXO11	NM_001190274.2	c.13C>G	p.(Arg5Gly)	missense	229	0.589	Step 1
5	2:135891497	RAB3GAP1	NM_012233.3	c.1393T>C	p.(Cys465Arg)	missense	340	0.432	Step 1
5	2:8926341	KIDINS220	NM_020738.4	c.1934C>T	p.(Thr645Ile)	missense	209	0.545	Step 1
5	2:179623851	TTN	NM_001267550.2	c.10163G>A	p.(Arg3388Gln)	missense	315	0.52	Step 1
5	3:93845188	NSUN3	NM_022072.5	c.877G>A	p.(Gly293Arg)	missense	355	0.484	Step 1
5	5:73985193	HEXB	NM_000521.4	c.341_343del	p.(Glu114_Pro115delinsAla)	inframe	270	0.362	Step 1
5	5:110073952	SLC25A46	NM_001303250.3	c.10+4G>A		noncoding	253	0.498	Step 1
5	5:127469909	SLC12A2	NM_001046.3	c.1241C>G	p.(Ala414Gly)	missense	216	0.5	Step 1
5	6:6174896	F13A1	NM_000129.4	c.1664C>T	p.(Ser555Leu)	missense	342	0.497	Step 1
5	4:76481777	ODAPH	NM_178497.5	c.67+418C>A		noncoding	208	0.442	Step 1
5	6:30890263	VARS2	NM_020442.6	c.1969C>T	p.(Arg657Trp)	missense	319	0.498	Step 1
5	4:79462132	FRAS1	NM_025074.7	c.11893A>G	p.(Asn3965Asp)	missense	333	0.561	Step 1
5	4:83770046	SEC31A	NM_001077207.4	c.2413G>A	p.(Glu805Lys)	missense	354	0.426	Step 1
5	6:170593031	DLL1	NM_005618.4	c.1336G>A	p.(Asp446Asn)	missense	310	0.493	Step 1
5	6:31747283	VARS1	NM_006295.3	c.3319G>A	p.(Ala1107Thr)	missense	370	0.504	Step 1
5	7:130038854	CEP41	NM_018718.3	c.1000G>A	p.(Gly334Arg)	missense	337	0.543	Step 1
5	6:129641781	LAMA2	NM_000426.4	c.4157A>T	p.(Tyr1386Phe)	missense	289	0.491	Step 1
5	6:131908843	MED23	NM_004830.4	c.4083C>T	p.(Pro1361=)	synonymous	304	0.404	Step 1
5	7:151875100	KMT2C	NM_170606.3	c.7443-12_7443-6dup		noncoding	22	0.333	Step 1
5	9:131286129	GLE1	NM_001003722.2	c.897+10dup		noncoding	294	0.557	Step 1
5	8:101225503	SPAG1	NM_003114.5	c.1293_1316del	p.(Ala432_Gly439del)	inframe	65	0.476	Step 1
5	9:135202505	SETX	NM_015046.7	c.4480G>T	p.(Asp1494Tyr)	missense	386	0.541	Step 1
5	10:99504647	ZFYVE27	NM_001385875.1	c.430G>A	p.(Glu144Lys)	missense	290	0.475	Step 1
5	10:105803619	COL17A1	NM_000494.4	c.2399-1G>T		splice	254	0.535	Step 1
5	10:78647085	KCNMA1	NM_001161352.2	c.3650A>G	p.(Asn1217Ser)	missense	357	0.504	Step 1
5	11:68685315	IGHMBP2	NM_002180.3	c.1024C>T	p.(Leu342Phe)	missense	252	0.476	Step 1
5	11:108216546	ATM	NM_000051.4	c.8495G>A	p.(Arg2832His)	missense	280	0.514	Step 1
5	11:134037976	NCAPD3	NM_015261.3	c.3488C>T	p.(Pro1163Leu)	missense	349	0.504	Step 1
5	12:48516616	PFKM	NM_000289.6	c.59T>C	p.(Val20Ala)	missense	301	0.521	Step 1
5	15:28419637	HERC2	NM_004667.6	c.9961A>G	p.(Ser3321Gly)	missense	435	0.354	Step 1
5	15:42652078	CAPN3	NM_000070.3	c.75C>A	p.(His25Gln)	missense	376	0.502	Step 1
5	21:46930164	COL18A1	NM_001379500.1	c.3682G>T	p.(Val1228Phe)	missense	282	0.496	Step 1
5	17:37842260	PGAP3	NM_033419.5	c.194G>A	p.(Arg65Gln)	missense	228	0.473	Step 1
5	17:37882110	ERBB2	NM_004448.4	c.2872+4C>T		noncoding	293	0.481	Step 1
5	X:73964279	NEXMIF	NM_001008537.3	c.113T>C	p.(Phe38Ser)	missense	311	0.475	Step 1
5	2:71839763	DYSF	NM_001130987.2	c.4222-8C>T		noncoding	281	0.416	Step 1
5	2:111423917	BUB1	NM_004336.5	c.880G>A	p.(Asp294Asn)	missense	242	0.495	Step 1
5	3:170828505	TNIK	NM_015028.4	c.2282G>A	p.(Arg761Gln)	missense	251	0.454	Step 1
5	5:90025579	ADGRV1	NM_032119.4	c.10547T>C	p.(Ile3516Thr)	missense	270	0.485	Step 1
5	11:17452526	ABCC8	NM_000352.6	c.1672-20A>T		noncoding	290	0.493	Step 1
5	21:27484444	APP	NM_000484.4	c.77C>G	p.(Ala26Gly)	missense	297	0.498	Step 1
5	1:186008917	HMCN1	NM_031935.3	c.6086T>C	p.(Val2029Ala)	missense	297	0.474	Step 1
5	1:8025396	PARK7	NM_007262.5	c.103G>A	p.(Val35Ile)	missense	304	0.5	Step 1
5	1:200881222	INAVA	NM_001142569.3	c.1601T>C	p.(Leu534Pro)	missense	320	0.443	Step 1
5	1:45797401	MUTYH	NM_001048174.2	c.1034C>T	p.(Ala345Val)	missense	451	0.487	Step 1
5	1:203195004	CHIT1	NM_003465.3	c.56-6G>A		noncoding	227	0.458	Step 1
5	1:207751179	CR1	NM_000651.6	c.4567G>A	p.(Ala1523Thr)	missense	288	0.444	Step 1
5	1:211832061	NEK2	NM_001204182.2	c.1112-12_1112-8dup		noncoding	21	0.4	Step 1
5	1:171763595	METTL13	NM_015935.5	c.1753A>C	p.(Met585Leu)	missense	348	0.5	Step 1
5	5:142264908	ARHGAP26	NM_001135608.3	c.430A>G	p.(Ile144Val)	missense	174	0.448	Step 1
5	5:131303680	ACSL6	NM_001009185.3	c.1549G>A	p.(Val517Ile)	missense	223	0.461	Step 1
5	5:138643834	MATR3	NM_018834.6	c.730C>T	p.(His244Tyr)	missense	318	0.481	Step 1
5	5:492016	SLC9A3	NM_004174.4	c.382G>A	p.(Gly128Ser)	missense	350	0.477	Step 1
5	7:23300297	GPNMB	NM_002510.3	c.923C>A	p.(Thr308Asn)	missense	318	0.49	Step 1
5	9:75309575	TMC1	NM_138691.3	c.181G>A	p.(Glu61Lys)	missense	341	0.445	Step 1
5	11:10500144	AMPD3	NM_001025389.2	c.293G>C	p.(Gly98Ala)	missense	326	0.45	Step 1
5	11:35243250	CD44	NM_000610.4	c.1995A>G	p.(Ala665=)	synonymous	241	0.506	Step 1
5	8:10467629	RP1L1	NM_178857.6	c.3979A>T	p.(Thr1327Ser)	missense	199	0.361	Step 1
5	8:17478711	PDGFRL	NM_001372073.1	c.505G>A	p.(Glu169Lys)	missense	267	0.494	Step 1
5	12:111885350	SH2B3	NM_005475.3	c.1236+3_1236+7del		noncoding	175	0.485	Step 1
5	12:122692954	DIABLO	NM_001371333.1	c.694C>T	p.(Gln232Ter)	nonsense	298	0.466	Step 1
5	12:124387491	DNAH10	NM_001372106.1	c.9646G>A	p.(Glu3216Lys)	missense	301	0.478	Step 1
5	11:95825206	MAML2	NM_032427.4	c.1935_1988del	p.(Gln648_Gln665del)	inframe	361	0.409	Step 1
5	11:66460553	SPTBN2	NM_006946.4	c.4873G>A	p.(Ala1625Thr)	missense	392	0.535	Step 1
5	10:96039606	PLCE1	NM_016341.4	c.4733A>T	p.(Asn1578Ile)	missense	232	0.469	Step 1
5	12:10233940	CLEC1A	NM_016511.4	c.287C>T	p.(Thr96Met)	missense	293	0.423	Step 1
5	15:100252748	MEF2A	NM_001319206.4	c.1296_1298del	p.(Pro433del)	inframe	277	0.53	Step 1
5	14:74960518	ISCA2	NM_194279.4	c.41A>G	p.(Gln14Arg)	missense	369	0.493	Step 1
5	15:72104297	NR2E3	NM_014249.4	c.352G>C	p.(Val118Leu)	missense	422	0.509	Step 1
5	18:44143072	LOXHD1	NM_001384474.1	c.2554A>G	p.(Ser852Gly)	missense	271	0.487	Step 1
5	17:78078642	GAA	NM_000152.5	c.257C>G	p.(Pro86Arg)	missense	384	0.481	Step 1
5	19:17452303	GTPBP3	NM_032620.4	c.1270A>G	p.(Thr424Ala)	missense	358	0.458	Step 1
5	21:34640810	IL10RB	NM_000628.5	c.161C>T	p.(Ala54Val)	missense	245	0.481	Step 1
5	21:40570769	BRWD1	NM_033656.4	c.5573A>T	p.(Gln1858Leu)	missense	341	0.469	Step 1
5	21:45949783	TSPEAR	NM_144991.3	c.688T>C	p.(Cys230Arg)	missense	339	0.507	Step 1
5	20:54961381	AURKA	NM_198437.3	c.251T>C	p.(Val84Ala)	missense	335	0.465	Step 1
5	19:579502	BSG	NM_001728.4	c.418G>C	p.(Gly140Arg)	missense	250	0.432	Step 1
5	19:7810766	CD209	NM_021155.4	c.386G>A	p.(Arg129Gln)	missense	352	0.437	Step 1
5	X:152801800	ATP2B3	NM_001001344.3	c.95C>T	p.(Ala32Val)	missense	357	0.484	Step 1
5	5:149749096	TCOF1	NM_001371623.1	c.570G>A	p.(Met190Ile)	missense	305	0.462	Step 1
5	5:52856502	NDUFS4	NM_002495.4	c.10G>C	p.(Val4Leu)	missense	256	0.464	Step 1
5	8:48614382	SPIDR	NM_001080394.4	c.1873C>T	p.(Leu625Phe)	missense	338	0.476	Step 1
5	15:23891911	MAGEL2	NM_019066.5	c.979G>A	p.(Ala327Thr)	missense	375	0.413	Step 1
5	1:7887691	PER3	NM_001377275.1	c.2702C>T	p.(Pro901Leu)	missense	406	0.514	Step 1
5	1:196963309	CFHR5	NM_030787.4	c.530A>G	p.(Lys177Arg)	missense	352	0.471	Step 1
5	1:152279668	FLG	NM_002016.2	c.7694C>G	p.(Ser2565Cys)	missense	355	0.523	Step 1
5	2:215645825	BARD1	NM_000465.4	c.773T>C	p.(Ile258Thr)	missense	392	0.464	Step 1
5	5:82835184	VCAN	NM_004385.5	c.6362A>G	p.(Gln2121Arg)	missense	384	0.505	Step 1
5	4:3534052	LRPAP1	NM_002337.4	c.88A>T	p.(Ser30Cys)	missense	391	0.455	Step 1
5	12:110783085	ATP2A2	NM_170665.4	c.2639C>T	p.(Pro880Leu)	missense	328	0.503	Step 1
5	12:45803231	ANO6	NM_001025356.3	c.1972A>G	p.(Met658Val)	missense	237	0.476	Step 1
5	19:1050945	ABCA7	NM_019112.4	c.2578C>T	p.(Pro860Ser)	missense	300	0.446	Step 1
5	X:101970441	GPRASP2	NM_001004051.4	c.644G>C	p.(Arg215Thr)	missense	439	0.498	Step 1
5	2:63131731	EHBP1	NM_001142616.3	c.1185+30064G>A		noncoding	17	0.588	Step 1
6	12:48380207	COL2A1	NM_001844.5	c.1439G>A	p.(Gly480Glu)	missense	402	0.5	Step 1,2 and 3
6	6:33157138	COL11A2	NM_080680.3	c.191G>A	p.(Arg64Gln)	missense	276	0.471	Step 1 and 2
6	1:103354445	COL11A1	NM_001854.4	c.4495C>T	p.(Pro1499Ser)	missense	256	0.558	Step 1 and 2
6	17:71189264	COG1	NM_018714.3	c.56C>A	p.(Ala19Glu)	missense	316	0.544	Step 1
6	10:112356254	SMC3	NM_005445.4	c.2062G>C	p.(Glu688Gln)	missense	227	0.466	Step 1
6	16:3634860	SLX4	NM_032444.4	c.4649G>A	p.(Arg1550Gln)	missense	504	0.478	Step 1
6	15:41001295	RAD51	NM_002875.5	c.416C>T	p.(Thr139Met)	missense	186	0.451	Step 1
6	4:126384711	FAT4	NM_001291303.3	c.11801-7A>G		noncoding	305	0.439	Step 1
6	7:75615394	POR	NM_001395413.1	c.1806+8G>A		noncoding	440	0.513	Step 1
6	12:133219531	POLE	NM_006231.4	c.4603G>A	p.(Gly1535Ser)	missense	519	0.483	Step 1
6	12:133218901	POLE	NM_006231.4	c.5035C>T	p.(Arg1679Cys)	missense	566	0.466	Step 1
6	20:10393406	MKKS	NM_170784.3	c.757T>C	p.(Ser253Pro)	missense	507	0.467	Step 1
6	17:78063996	CCDC40	NM_017950.4	c.2832+313A>T		noncoding	120	0.657	Step 1
6	22:50903280	SBF1	NM_002972.4	c.1399G>A	p.(Val467Ile)	missense	402	0.542	Step 1
6	19:38949863	RYR1	NM_000540.3	c.2245C>G	p.(Leu749Val)	missense	558	0.525	Step 1
6	15:91341438	BLM	NM_000057.4	c.3229G>A	p.(Val1077Met)	missense	193	0.466	Step 1
6	22:22162115	MAPK1	NM_002745.5	c.140A>C	p.(Asn47Thr)	missense	374	0.494	Step 1
6	20:62321689	RTEL1	NM_001283009.2	c.2308G>A	p.(Gly770Arg)	missense	343	0.545	Step 1
6	19:1226588	STK11	NM_000455.5	c.1244G>A	p.(Arg415His)	missense	203	0.517	Step 1
6	18:67781701	RTTN	NM_173630.4	c.3663T>G	p.(Asn1221Lys)	missense	222	0.481	Step 1
6	17:40695565	NAGLU	NM_000263.4	c.1541G>A	p.(Arg514His)	missense	557	0.522	Step 1
6	17:39978488	FKBP10	NM_021939.4	c.1577T>A	p.(Ile526Asn)	missense	256	0.41	Step 1
6	11:126141551	FOXRED1	NM_017547.4	c.305C>T	p.(Thr102Met)	missense	290	0.468	Step 1
6	11:118918522	HYOU1	NM_006389.5	c.2519G>A	p.(Arg840Gln)	missense	307	0.459	Step 1
6	16:11017189	CIITA	NM_000246.4	c.*22+7A>T		noncoding	76	0.263	Step 1
6	16:30999194	HSD3B7	NM_025193.4	c.800G>A	p.(Ser267Asn)	missense	633	0.491	Step 1
6	15:43290393	UBR1	NM_174916.3	c.3730T>C	p.(Ser1244Pro)	missense	173	0.508	Step 1
6	14:20915823	OSGEP	NM_017807.4	c.820G>A	p.(Ala274Thr)	missense	237	0.481	Step 1
6	8:145024775	PLEC	NM_201378.4	c.71-11915C>T		noncoding	432	0.497	Step 1
6	13:52523859	ATP7B	NM_000053.4	c.2804C>T	p.(Thr935Met)	missense	215	0.441	Step 1
6	8:97172825	GDF6	NM_001001557.4	c.93_95del	p.(Ser34del)	inframe	431	0.512	Step 1
6	9:135203017	SETX	NM_015046.7	c.3968G>A	p.(Arg1323Gln)	missense	562	0.469	Step 1
6	9:131745624	NUP188	NM_015354.3	c.1849T>A	p.(Cys617Ser)	missense	342	0.514	Step 1
6	9:131731745	NUP188	NM_015354.3	c.867_875del	p.(Asp289_Arg291del)	inframe	320	0.418	Step 1
6	8:17916355	ASAH1	NM_177924.5	c.1087G>A	p.(Val363Ile)	missense	169	0.485	Step 1
6	7:142458472	PRSS1	NM_002769.5	c.107C>G	p.(Pro36Arg)	missense	379	0.353	Step 1
6	4:184622936	TRAPPC11	NM_021942.6	c.2938G>A	p.(Gly980Arg)	missense	291	0.498	Step 1
6	7:151893095	KMT2C	NM_170606.3	c.4275T>A	p.(Gly1425=)	synonymous	121	0.504	Step 1
6	7:39991037	CDK13	NM_003718.5	c.797G>A	p.(Ser266Asn)	missense	289	0.508	Step 1
6	7:107600968	LAMB1	NM_002291.3	c.2236G>A	p.(Val746Ile)	missense	370	0.486	Step 1
6	6:43748545	POLR1C	NM_001318876.2	c.945+251536G>A		noncoding	375	0.49	Step 1
6	4:85710982	WDFY3	NM_014991.6	c.3566T>C	p.(Ile1189Thr)	missense	259	0.528	Step 1
6	6:31323094	HLA-B	NM_005514.8	c.895G>A	p.(Glu299Lys)	missense	84	0.357	Step 1
6	4:3076603	HTT	NM_001388492.1	c.84_110dup	p.(Gln30_Gln38dup)	inframe	21	0.588	Step 1
6	2:189916125	COL5A2	NM_000393.5	c.2852G>A	p.(Gly951Glu)	missense	542	0.509	Step 1
6	2:179413574	TTN	NM_001267550.2	c.92779A>G	p.(Ile30927Val)	missense	700	0.467	Step 1
6	2:179543161	TTN	NM_001267550.2	c.33890T>A	p.(Val11297Glu)	missense	241	0.468	Step 1
6	2:179528013	TTN	NM_001267550.2	c.36680C>T	p.(Pro12227Leu)	missense	84	0.392	Step 1
6	2:179519492	TTN	NM_001267550.2	c.38186C>T	p.(Pro12729Leu)	missense	22	0.363	Step 1
6	2:179470163	TTN	NM_001267550.2	c.53859T>A	p.(Asn17953Lys)	missense	457	0.505	Step 1
6	3:132415614	NPHP3	NM_153240.5	c.2132A>G	p.(Asn711Ser)	missense	183	0.513	Step 1
6	3:139097997	COPB2	NM_004766.3	c.247G>A	p.(Val83Met)	missense	150	0.473	Step 1
6	2:152499320	NEB	NM_001164508.2	c.8224G>C	p.(Glu2742Gln)	missense	339	0.445	Step 1
6	2:69351767	ANTXR1	NM_032208.3	c.943A>G	p.(Thr315Ala)	missense	310	0.412	Step 1
6	1:986945	AGRN	NM_198576.4	c.5483A>G	p.(Asn1828Ser)	missense	433	0.512	Step 1
6	X:38158334	RPGR	NM_001034853.2	c.1117_1119dup	p.(Lys373dup)	inframe	656	1	Step 1
6	16:86544210	FOXF1	NM_001451.3	c.57_59dup	p.(Gly23dup)	inframe	205	0.435	Step 1
6	19:45998164	RTN2	NM_005619.5	c.179G>C	p.(Arg60Pro)	missense	507	0.506	Step 1
6	9:372197	DOCK8	NM_203447.4	c.2020C>G	p.(Leu674Val)	missense	335	0.504	Step 1
6	8:133961194	TG	NM_003235.5	c.5401+6T>C		noncoding	256	0.445	Step 1
6	12:7848074	GDF3	NM_020634.3	c.251G>T	p.(Arg84Leu)	missense	261	0.459	Step 1
6	7:21857920	DNAH11	NM_001277115.2	c.10654G>T	p.(Asp3552Tyr)	missense	286	0.503	Step 1
6	3:49167666	LAMB2	NM_002292.4	c.1223G>A	p.(Arg408His)	missense	345	0.518	Step 1
6	1:35227183	GJB4	NM_153212.3	c.328G>A	p.(Gly110Arg)	missense	611	0.476	Step 1
6	X:48932798	WDR45	NM_001029896.2	c.970A>G	p.(Ile324Val)	missense	115	1	Step 1
6	17:56272524	EPX	NM_000502.6	c.794C>T	p.(Pro265Leu)	missense	317	0.526	Step 1
6	15:73635908	HCN4	NM_005477.3	c.1027A>G	p.(Met343Val)	missense	601	0.505	Step 1
6	22:27024364	CRYBA4	NM_001886.3	c.413A>G	p.(Glu138Gly)	missense	281	0.491	Step 1
6	12:50344783	AQP2	NM_000486.6	c.170A>C	p.(Gln57Pro)	missense	607	0.474	Step 1
6	19:7509332	ARHGEF18	NM_001367823.1	c.1603G>A	p.(Val535Ile)	missense	295	0.43	Step 1
6	19:1399019	GAMT	NM_000156.6	c.466G>A	p.(Ala156Thr)	missense	481	0.484	Step 1
6	20:60885271	LAMA5	NM_005560.6	c.10697C>T	p.(Thr3566Met)	missense	333	0.507	Step 1
6	14:76211515	TTLL5	NM_015072.5	c.1359G>C	p.(Lys453Asn)	missense	518	0.459	Step 1
6	20:52779402	CYP24A1	NM_000782.5	c.845-2dup		splice	204	0.475	Step 1
6	14:68250193	ZFYVE26	NM_015346.4	c.3676G>A	p.(Val1226Ile)	missense	370	0.456	Step 1
6	18:43314238	SLC14A1	NM_015865.7	c.342-1G>A		splice	452	0.502	Step 1
6	18:28966742	DSG4	NM_177986.5	c.176G>A	p.(Arg59Gln)	missense	255	0.56	Step 1
6	18:21123533	NPC1	NM_000271.5	c.2131A>G	p.(Arg711Gly)	missense	166	0.62	Step 1
6	16:72991391	ZFHX3	NM_006885.4	c.2654A>G	p.(Gln885Arg)	missense	487	0.453	Step 1
6	10:118306934	PNLIP	NM_000936.4	c.175A>G	p.(Thr59Ala)	missense	252	0.523	Step 1
6	12:122977339	ZCCHC8	NM_017612.5	c.243-3T>C		noncoding	143	0.468	Step 1
6	8:79650746	IL7	NM_000880.4	c.353C>T	p.(Thr118Ile)	missense	231	0.545	Step 1
6	12:110006618	MMAB	NM_052845.4	c.247T>C	p.(Phe83Leu)	missense	451	0.503	Step 1
6	11:8115604	TUB	NM_177972.3	c.270_273del	p.(Leu91ProfsTer63)	frameshift	228	0.517	Step 1
6	8:55533782	RP1	NM_006269.2	c.256C>A	p.(Pro86Thr)	missense	591	0.512	Step 1
6	11:824756	PNPLA2	NM_020376.4	c.1409C>T	p.(Ala470Val)	missense	278	0.507	Step 1
6	8:10465949	RP1L1	NM_178857.6	c.5618_5658del	p.(Asp1873ValfsTer42)	frameshift	1123	0.298	Step 1
6	8:10465941	RP1L1	NM_178857.6	c.5660_5666del	p.(Ser1887LeufsTer2)	frameshift	868	0.415	Step 1
6	7:107408097	SLC26A3	NM_000111.3	c.2206-8T>C		noncoding	236	0.427	Step 1
6	6:43748545	VEGFA	NM_001317010.1	c.423-1148G>A		noncoding	375	0.49	Step 1
6	7:91730366	AKAP9	NM_005751.5	c.11093T>C	p.(Leu3698Ser)	missense	164	0.439	Step 1
6	6:160505195	IGF2R	NM_000876.4	c.6047C>T	p.(Ser2016Phe)	missense	429	0.475	Step 1
6	4:55140770	PDGFRA	NM_006206.6	c.1631T>C	p.(Val544Ala)	missense	399	0.491	Step 1
6	5:142662253	NR3C1	NM_000176.3	c.2061T>G	p.(Asp687Glu)	missense	440	0.463	Step 1
6	3:197423848	RUBCN	NM_014687.4	c.1334C>T	p.(Pro445Leu)	missense	204	0.46	Step 1
6	3:49395420	GPX1	NM_000581.4	c.252+34_252+39dup		noncoding	600	0.44	Step 1
6	2:219029361	CXCR1	NM_000634.3	c.574G>A	p.(Gly192Arg)	missense	634	0.462	Step 1
6	3:130714870	ATP2C1	NM_001378687.1	c.2058-17T>C		noncoding	109	0.348	Step 1
6	3:150659515	CLRN1	NM_174878.3	c.287G>C	p.(Ser96Thr)	missense	251	0.458	Step 1
6	3:126229622	UROC1	NM_144639.3	c.142G>A	p.(Ala48Thr)	missense	333	0.498	Step 1
6	1:152280113	FLG	NM_002016.2	c.7249C>T	p.(Gln2417Ter)	nonsense	1332	0.524	Step 1
6	17:58678032	PPM1D	NM_003620.4	c.257C>T	p.(Pro86Leu)	missense	608	0.475	Step 1
6	21:43905889	RSPH1	NM_080860.4	c.391G>A	p.(Ala131Thr)	missense	364	0.5	Step 1
6	14:58934485	KIAA0586	NM_001329943.3	c.2287C>T	p.(Pro763Ser)	missense	279	0.469	Step 1
6	9:100459491	XPA	NM_000380.4	c.84C>G	p.(Ile28Met)	missense	219	0.52	Step 1
6	19:12996800	KLF1	NM_006563.5	c.244T>A	p.(Phe82Ile)	missense	555	0.516	Step 1
6	6:32372944	BTNL2	NM_001304561.2	c.199C>T	p.(Arg67Cys)	missense	625	0.54	Step 1
6	2:48026185	MSH6	NM_000179.3	c.1063G>A	p.(Gly355Ser)	missense	513	0.452	Step 1
6	12:53043708	KRT2	NM_000423.3	c.851C>T	p.(Thr284Met)	missense	272	0.492	Step 1
6	16:2152447	PKD1	NM_001009944.3	c.9136C>T	p.(Arg3046Cys)	missense	330	0.533	Step 1
6	1:7887691	PER3	NM_001377275.1	c.2702C>T	p.(Pro901Leu)	missense	609	0.435	Step 1
7	12:48369763	COL2A1	NM_001844.5	c.3580G>C	p.(Gly1194Arg)	missense	158	0.531	Step 1,2 and 3
7	1:9778888	PIK3CD	NM_005026.5	c.1157G>T	p.(Arg386Leu)	missense	89	0.46	Step 1 and 2
7	21:34957003	DONSON	NM_017613.4	c.678G>T	p.(Leu226Phe)	missense	295	0.383	Step 1 and 2
7	7:128852005	SMO	NM_005631.5	c.2077C>T	p.(Pro693Ser)	missense	135	0.466	Step 1
7	3:142277459	ATR	NM_001184.4	c.1885+7G>A		noncoding	168	0.428	Step 1
7	10:104359273	SUFU	NM_016169.4	c.994C>G	p.(Gln332Glu)	missense	133	0.458	Step 1
7	15:89804969	FANCI	NM_001113378.2	c.442A>G	p.(Lys148Glu)	missense	445	0.514	Step 1
7	17:48263348	COL1A1	NM_000088.4	c.4039G>A	p.(Asp1347Asn)	missense	104	0.49	Step 1
7	1:165737719	TMCO1	NM_019026.6	c.70+200G>A		noncoding	352	0.46	Step 1
7	2:179427819	TTN	NM_001267550.2	c.83040T>A	p.(Asp27680Glu)	missense	309	0.501	Step 1
7	2:152536534	NEB	NM_001164508.2	c.3045C>A	p.(Ile1015=)	synonymous	266	0.511	Step 1
7	2:174128617	MAP3K20	NM_016653.3	c.1696G>A	p.(Asp566Asn)	missense	278	0.485	Step 1
7	3:57132412	IL17RD	NM_017563.5	c.1319G>T	p.(Gly440Val)	missense	193	0.538	Step 1
7	6:75823341	COL12A1	NM_004370.6	c.7817C>T	p.(Pro2606Leu)	missense	431	0.503	Step 1
7	5:134364485	PITX1	NM_002653.5	c.929G>C	p.(Cys310Ser)	missense	31	0.612	Step 1
7	6:80656981	ELOVL4	NM_022726.4	c.16T>C	p.(Ser6Pro)	missense	85	0.435	Step 1
7	10:89272896	MINPP1	NM_004897.5	c.851C>G	p.(Ala284Gly)	missense	376	0.481	Step 1
7	9:14747329	FREM1	NM_001379081.2	c.5942T>A	p.(Ile1981Asn)	missense	346	0.471	Step 1
7	7:130040641	CEP41	NM_018718.3	c.664A>G	p.(Ile222Val)	missense	173	0.427	Step 1
7	12:4385165	CCND2	NM_001759.4	c.196-6T>A		noncoding	55	0.25	Step 1
7	12:7048199	ATN1	NM_001940.4	c.3073A>G	p.(Arg1025Gly)	missense	71	0.507	Step 1
7	16:50745990	NOD2	NM_001370466.1	c.2087C>T	p.(Pro696Leu)	missense	135	0.555	Step 1
7	12:31256773	DDX11	NM_030653.4	c.*3G>A		UTR	83	0.385	Step 1
7	15:23812415	MKRN3	NM_005664.4	c.1486C>G	p.(His496Asp)	missense	385	0.496	Step 1
7	16:88780846	CTU2	NM_001012759.3	c.1153G>A	p.(Gly385Ser)	missense	15	0.333	Step 1
7	17:3392538	ASPA	NM_000049.4	c.536T>C	p.(Val179Ala)	missense	398	0.467	Step 1
7	19:44237580	SMG9	NM_019108.4	c.1235A>G	p.(Asn412Ser)	missense	277	0.48	Step 1
7	21:34923685	SON	NM_138927.4	c.2148A>T	p.(Leu716Phe)	missense	193	0.559	Step 1
7	4:106156552	TET2	NM_001127208.3	c.1453G>T	p.(Val485Leu)	missense	550	0.507	Step 1
7	8:41550616	ANK1	NM_000037.4	c.3629+7C>T		noncoding	154	0.506	Step 1
7	6:111912629	TRAF3IP2	NM_147686.4	c.661G>A	p.(Val221Met)	missense	187	0.524	Step 1
7	11:69465896	CCND1	NM_053056.3	c.734G>A	p.(Arg245Gln)	missense	106	0.452	Step 1
7	16:86544210	FOXF1	NM_001451.3	c.57_59dup	p.(Gly23dup)	inframe	32	0.468	Step 1
7	14:88857722	SPATA7	NM_018418.5	c.20_23del	p.(Val7GlufsTer19)	frameshift	266	0.462	Step 1
7	19:42910478	LIPE	NM_005357.4	c.2200G>A	p.(Val734Met)	missense	80	0.412	Step 1
7	17:11501829	DNAH9	NM_001372.4	c.19_39del	p.(Arg7_Glu13del)	inframe	104	0.48	Step 1
7	21:44839770	SIK1	NM_173354.5	c.1088G>A	p.(Arg363Gln)	missense	33	0.393	Step 1
7	21:46311816	ITGB2	NM_000211.5	c.1320G>C	p.(Gln440His)	missense	59	0.525	Step 1
7	2:25057657	ADCY3	NM_004036.5	c.1805+6C>T		noncoding	83	0.614	Step 1
7	1:76262759	MSH4	NM_002440.4	c.89G>C	p.(Arg30Pro)	missense	237	0.506	Step 1
7	1:152284886	FLG	NM_002016.2	c.2476C>T	p.(Arg826Ter)	nonsense	122	0.565	Step 1
7	1:152282596	FLG	NM_002016.2	c.4766G>A	p.(Arg1589His)	missense	127	0.574	Step 1
7	1:235952111	LYST	NM_000081.4	c.4578T>A	p.(Asn1526Lys)	missense	345	0.55	Step 1
7	2:136624256	MCM6	NM_005915.6	c.658A>G	p.(Ile220Val)	missense	359	0.445	Step 1
7	1:211832061	NEK2	NM_001204182.2	c.1112-8dup		noncoding	20	0.75	Step 1
7	2:208432179	CREB1	NM_004379.5	c.262-8A>C		noncoding	318	0.518	Step 1
7	3:53289924	TKT	NM_001064.4	c.35T>C	p.(Leu12Pro)	missense	18	0.611	Step 1
7	3:46415400	CCR5	NM_001394783.1	c.1007G>T	p.(Ser336Ile)	missense	211	0.459	Step 1
7	2:227660962	IRS1	NM_005544.3	c.2493T>A	p.(His831Gln)	missense	68	0.411	Step 1
7	5:146017939	PPP2R2B	NM_181675.4	c.665C>T	p.(Thr222Met)	missense	253	0.525	Step 1
7	6:10529943	GCNT2	NM_145649.5	c.799G>A	p.(Val267Met)	missense	357	0.515	Step 1
7	6:16327897	ATXN1	NM_001128164.2	c.642_645delinsTCAGCAT	p.(Gln214_Gln215delinsHisGlnHis)	inframe	183	0.285	Step 1
7	9:2648804	VLDLR	NM_003383.5	c.2098C>G	p.(Pro700Ala)	missense	272	0.479	Step 1
7	12:80696534	OTOGL	NM_001378609.3	c.3184A>T	p.(Ile1062Phe)	missense	258	0.515	Step 1
7	12:80933694	PTPRQ	NM_001145026.2	c.2669A>G	p.(Asp890Gly)	missense	476	0.434	Step 1
7	12:96380997	HAL	NM_002108.4	c.904-5G>A		noncoding	142	0.507	Step 1
7	10:48390078	RBP3	NM_002900.3	c.800G>A	p.(Arg267Gln)	missense	95	0.473	Step 1
7	13:113824769	PROZ	NM_003891.3	c.616G>A	p.(Val206Ile)	missense	123	0.463	Step 1
7	12:26877641	ITPR2	NM_002223.4	c.314C>T	p.(Ser105Leu)	missense	180	0.438	Step 1
7	16:66514742	BEAN1	NM_001178020.3	c.694C>A	p.(Pro232Thr)	missense	187	0.449	Step 1
7	11:71817107	LRTOMT	NM_001145309.4	c.209G>A	p.(Arg70Gln)	missense	193	0.544	Step 1
7	11:71900803	FOLR1	NM_016724.3	c.-75G>A		UTR	60	0.416	Step 1
7	15:40588833	PLCB2	NM_004573.3	c.1489T>C	p.(Trp497Arg)	missense	178	0.426	Step 1
7	16:87678440	JPH3	NM_020655.4	c.959G>A	p.(Arg320His)	missense	89	0.528	Step 1
7	19:15651365	CYP4F22	NM_173483.4	c.776C>G	p.(Ala259Gly)	missense	159	0.515	Step 1
7	22:37466962	TMPRSS6	NM_001374504.1	c.1666C>T	p.(His556Tyr)	missense	67	0.477	Step 1
7	22:37492731	TMPRSS6	NM_001374504.1	c.361C>T	p.(Arg121Cys)	missense	96	0.447	Step 1
7	20:48156188	PTGIS	NM_000961.4	c.592G>A	p.(Val198Ile)	missense	163	0.478	Step 1
7	21:34668595	IL10RB	NM_000628.5	c.911G>A	p.(Ser304Asn)	missense	356	0.429	Step 1
7	19:50209270	CPT1C	NM_001199753.2	c.1069G>A	p.(Ala357Thr)	missense	131	0.526	Step 1
7	11:118376737	KMT2A	NM_001197104.2	c.10130A>G	p.(Asp3377Gly)	missense	293	0.467	Step 1
7	17:74729418	METTL23	NM_001080510.5	c.366G>C	p.(Lys122Asn)	missense	328	0.469	Step 1
7	2:48010586	MSH6	NM_000179.3	c.214C>T	p.(Leu72Phe)	missense	37	0.459	Step 1
7	7:6026708	PMS2	NM_000535.7	c.1688G>A	p.(Arg563Gln)	missense	232	0.5	Step 1
7	X:8503796	ANOS1	NM_000216.4	c.1678G>A	p.(Val560Ile)	missense	205	1	Step 1
7	9:135946948	CEL	NM_001807.6	c.2059T>G	p.(Ser687Ala)	missense	22	0.272	Step 1
7	18:61459639	SERPINB7	NM_003784.4	c.181A>G	p.(Asn61Asp)	missense	245	0.448	Step 1
7	22:38119972	TRIOBP	NM_001039141.3	c.1409A>G	p.(Asn470Ser)	missense	214	0.405	Step 1
7	17:67303010	ABCA5	NM_172232.4	c.644C>A	p.(Thr215Asn)	missense	275	0.436	Step 1
7	19:45314515	BCAM	NM_005581.5	c.116C>T	p.(Pro39Leu)	missense	149	0.503	Step 1
8	12:48370314	COL2A1	NM_001844.5	c.3472G>A	p.(Gly1158Ser)	missense	83	0.445	Step 1,2 and 3
8	17:6502551	KIAA0753	NM_014804.3	c.2172+6C>T		noncoding	70	0.414	Step 1 and 2
8	22:20786125	SCARF2	NM_182895.5	c.241G>A	p.(Glu81Lys)	missense	57	0.421	Step 1 and 2
8	21:47831740	PCNT	NM_006031.6	c.5753A>T	p.(Glu1918Val)	missense	124	0.516	Step 1 and 2
8	21:47769636	PCNT	NM_006031.6	c.1246A>G	p.(Ile416Val)	missense	57	0.456	Step 1 and 2
8	4:1808901	FGFR3	NM_000142.5	c.2333C>G	p.(Pro778Arg)	missense	39	0.487	Step 1 and 2
8	22:19481872	CDC45	NM_003504.5	c.509G>A	p.(Arg170Gln)	missense	150	0.506	Step 1
8	21:45750340	CFAP410	NM_004928.3	c.643-131T>C		noncoding	41	0.56	Step 1
8	17:57724824	CLTC	NM_004859.4	c.316G>A	p.(Asp106Asn)	missense	140	0.407	Step 1
8	17:56283519	MKS1	NM_017777.4	c.1601G>A	p.(Arg534Gln)	missense	122	0.459	Step 1
8	22:26348297	MYO18B	NM_032608.7	c.5878G>A	p.(Val1960Met)	missense	58	0.637	Step 1
8	17:44895933	WNT3	NM_030753.5	c.31G>T	p.(Gly11Cys)	missense	45	0.511	Step 1
8	18:49867165	DCC	NM_005215.4	c.8A>G	p.(Asn3Ser)	missense	75	0.493	Step 1
8	18:25593770	CDH2	NM_001792.5	c.276C>G	p.(Ser92Arg)	missense	159	0.452	Step 1
8	18:19751624	GATA6	NM_005257.6	c.531_545del	p.(Ala179_Ala183del)	inframe	67	0.492	Step 1
8	19:41025754	SPTBN4	NM_020971.3	c.3350C>G	p.(Pro1117Arg)	missense	77	0.545	Step 1
8	17:80710100	TBCD	NM_005993.5	c.31G>A	p.(Gly11Ser)	missense	31	0.677	Step 1
8	20:30232646	COX4I2	NM_032609.3	c.455T>A	p.(Val152Glu)	missense	95	0.41	Step 1
8	20:5294708	PROKR2	NM_144773.4	c.308C>T	p.(Ala103Val)	missense	167	0.479	Step 1
8	12:56090153	ITGA7	NM_002206.3	c.1801C>T	p.(Arg601Trp)	missense	77	0.519	Step 1
8	11:118927725	HYOU1	NM_006389.5	c.-8+6G>A		noncoding	105	0.542	Step 1
8	15:65321758	MTFMT	NM_139242.4	c.194C>T	p.(Ala65Val)	missense	144	0.555	Step 1
8	17:40113454	ODAD4	NM_031421.5	c.1300G>A	p.(Val434Met)	missense	38	0.526	Step 1
8	15:53992064	WDR72	NM_182758.4	c.1648C>T	p.(Leu550Phe)	missense	123	0.471	Step 1
8	17:7412336	POLR2A	NM_000937.5	c.3539A>G	p.(Asn1180Ser)	missense	127	0.488	Step 1
8	12:7045885	ATN1	NM_001940.4	c.1461_1472del	p.(Gln499_Gln502del)	inframe	104	0.27	Step 1
8	12:6707488	CHD4	NM_001273.5	c.1586C>T	p.(Thr529Met)	missense	251	0.434	Step 1
8	14:24728287	TGM1	NM_000359.3	c.1153A>G	p.(Thr385Ala)	missense	89	0.55	Step 1
8	9:94817707	SPTLC1	NM_006415.4	c.759del	p.(Ile254PhefsTer10)	frameshift	40	0.475	Step 1
8	9:88284413	AGTPBP1	NM_001330701.2	c.649T>C	p.(Ser217Pro)	missense	118	0.466	Step 1
8	11:9199735	DENND5A	NM_015213.4	c.1850G>A	p.(Arg617Gln)	missense	160	0.45	Step 1
8	11:1268087	MUC5B	NM_002458.3	c.9977C>T	p.(Thr3326Met)	missense	199	0.427	Step 1
8	11:57572176	CTNND1	NM_001085458.2	c.1646G>A	p.(Arg549Gln)	missense	82	0.67	Step 1
8	7:73467645	ELN	NM_000501.4	c.1096+6C>A		noncoding	156	0.342	Step 1
8	6:152722394	SYNE1	NM_182961.4	c.6908C>T	p.(Thr2303Met)	missense	203	0.394	Step 1
8	6:131948816	MED23	NM_004830.4	c.40-8_40-5dup		noncoding	32	0.434	Step 1
8	5:71496063	MAP1B	NM_005909.5	c.6881A>C	p.(Glu2294Ala)	missense	227	0.524	Step 1
8	5:37164420	CPLANE1	NM_001384732.1	c.7543G>C	p.(Glu2515Gln)	missense	81	0.382	Step 1
8	5:141334760	PCDH12	NM_016580.4	c.2657C>T	p.(Pro886Leu)	missense	256	0.484	Step 1
8	6:30892176	VARS2	NM_020442.6	c.2512C>T	p.(Pro838Ser)	missense	77	0.532	Step 1
8	5:126758444	MEGF10	NM_001256545.2	c.1673G>T	p.(Arg558Leu)	missense	43	0.581	Step 1
8	2:238287719	COL6A3	NM_004369.4	c.2057C>T	p.(Thr686Ile)	missense	156	0.532	Step 1
8	6:50807897	TFAP2B	NM_003221.4	c.969T>G	p.(Phe323Leu)	missense	92	0.586	Step 1
8	3:186937924	MASP1	NM_001879.6	c.2035G>A	p.(Gly679Arg)	missense	203	0.536	Step 1
8	3:48607323	COL7A1	NM_000094.4	c.7511G>A	p.(Arg2504His)	missense	114	0.473	Step 1
8	2:179457564	TTN	NM_001267550.2	c.59282A>G	p.(Asn19761Ser)	missense	105	0.457	Step 1
8	4:3174644	HTT	NM_001388492.1	c.3952A>C	p.(Thr1318Pro)	missense	142	0.471	Step 1
8	2:170367343	KLHL41	NM_006063.3	c.1055G>A	p.(Gly352Glu)	missense	98	0.561	Step 1
8	1:220208294	EPRS1	NM_004446.3	c.193G>A	p.(Ala65Thr)	missense	60	0.45	Step 1
8	1:173794427	DARS2	NM_018122.5	c.60G>T	p.(Arg20Ser)	missense	56	0.446	Step 1
8	2:109545667	EDAR	NM_022336.4	c.343C>G	p.(Pro115Ala)	missense	58	0.551	Step 1
8	2:97031653	NCAPH	NM_015341.5	c.1738G>A	p.(Val580Met)	missense	93	0.29	Step 1
8	2:44100999	ABCG8	NM_022437.3	c.1285A>G	p.(Met429Val)	missense	94	0.542	Step 1
8	1:64089337	PGM1	NM_002633.3	c.247-5758del		noncoding	132	0.507	Step 1
8	1:46660029	POMGNT1	NM_017739.4	c.796C>T	p.(Arg266Trp)	missense	89	0.573	Step 1
8	1:16261134	SPEN	NM_015001.3	c.8399C>T	p.(Ala2800Val)	missense	228	0.543	Step 1
8	X:24024216	KLHL15	NM_030624.3	c.595G>A	p.(Glu199Lys)	missense	175	0.571	Step 1
8	18:55315829	ATP8B1	NM_001374385.1	c.3647G>T	p.(Gly1216Val)	missense	128	0.453	Step 1
8	15:45396158	DUOX2	NM_001363711.2	c.2654G>T	p.(Arg885Leu)	missense	56	0.375	Step 1
8	12:49176731	ADCY6	NM_015270.5	c.487A>G	p.(Thr163Ala)	missense	112	0.464	Step 1
8	14:78021768	SPTLC2	NM_004863.4	c.1051G>T	p.(Ala351Ser)	missense	147	0.401	Step 1
8	14:23790699	PABPN1	NM_004643.4	c.30_32dup	p.(Ala11dup)	inframe	18	0.555	Step 1
8	7:45113063	CCM2	NM_031443.4	c.808T>G	p.(Phe270Val)	missense	16	0.25	Step 1
8	7:44187283	GCK	NM_000162.5	c.829G>A	p.(Val277Met)	missense	89	0.449	Step 1
8	5:90052925	ADGRV1	NM_032119.4	c.11887G>A	p.(Gly3963Ser)	missense	162	0.506	Step 1
8	8:133980143	TG	NM_003235.5	c.5791A>G	p.(Ile1931Val)	missense	85	0.588	Step 1
8	7:154672601	DPP6	NM_130797.4	c.2082G>A	p.(Thr694=)	synonymous	53	0.509	Step 1
8	6:51612824	PKHD1	NM_138694.4	c.9590A>C	p.(Gln3197Pro)	missense	145	0.565	Step 1
8	1:169529854	F5	NM_000130.5	c.524A>G	p.(His175Arg)	missense	223	0.47	Step 1
8	1:17326990	ATP13A2	NM_022089.4	c.745G>A	p.(Ala249Thr)	missense	78	0.551	Step 1
8	1:6504553	ESPN	NM_031475.3	c.1003C>T	p.(Arg335Cys)	missense	60	0.516	Step 1
8	1:35250494	GJB3	NM_024009.3	c.131G>A	p.(Trp44Ter)	nonsense	352	0.517	Step 1
8	10:105905243	CFAP43	NM_025145.7	c.3935G>A	p.(Arg1312His)	missense	33	0.333	Step 1
8	21:45733566	PFKL	NM_002626.6	c.638+2del		splice	20	0.3	Step 1
8	X:70387645	NLGN3	NM_181303.2	c.1698G>A	p.(Lys566=)	synonymous	193	0.45	Step 1
8	22:46930927	CELSR1	NM_001378328.1	c.2141G>A	p.(Arg714His)	missense	65	0.369	Step 1
8	16:23568634	EARS2	NM_001083614.2	c.31C>T	p.(Arg11Cys)	missense	64	0.546	Step 1
8	16:1887877	MEIOB	NM_001163560.3	c.1219-7del		noncoding	31	0.259	Step 1
8	19:41198056	COQ8B	NM_024876.4	c.1519G>A	p.(Ala507Thr)	missense	240	0.47	Step 1
8	19:40873631	PLD3	NM_012268.4	c.274G>A	p.(Gly92Ser)	missense	104	0.48	Step 1
8	20:54961423	AURKA	NM_198437.3	c.209C>T	p.(Pro70Leu)	missense	130	0.415	Step 1
8	11:130069894	ST14	NM_021978.4	c.1856C>T	p.(Thr619Met)	missense	94	0.531	Step 1
8	16:72173270	PMFBP1	NM_031293.3	c.836A>T	p.(Lys279Ile)	missense	44	0.386	Step 1
8	16:72094590	HP	NM_005143.5	c.1022C>T	p.(Ala341Val)	missense	151	0.35	Step 1
8	10:96609810	CYP2C19	NM_000769.4	c.1286C>A	p.(Ser429Ter)	nonsense	99	0.464	Step 1
8	17:26857841	FOXN1	NM_001369369.1	c.905C>T	p.(Thr302Met)	missense	68	0.367	Step 1
8	16:67688404	CARMIL2	NM_001013838.3	c.3391A>G	p.(Thr1131Ala)	missense	91	0.395	Step 1
8	10:82036188	MAT1A	NM_000429.3	c.712G>A	p.(Glu238Lys)	missense	85	0.4	Step 1
8	13:111267958	NAXD	NM_001242882.2	c.10G>T	p.(Gly4Cys)	missense	147	0.448	Step 1
8	14:92537354	ATXN3	NM_004993.6	c.895_915dup	p.(Gln299_Gln305dup)	inframe	35	0.454	Step 1
8	9:123744116	C5	NM_001735.3	c.3486+6T>C		noncoding	82	0.5	Step 1
8	14:23790699	BCL2L2-PABPN1	NM_001387340.1	c.550-682_550-680dup		noncoding	18	0.555	Step 1
8	11:640052	DRD4	NM_000797.4	c.807_820del	p.(Pro270ArgfsTer175)	frameshift	21	0.333	Step 1
8	7:87046753	ABCB4	NM_000443.4	c.2557G>A	p.(Gly853Ser)	missense	97	0.536	Step 1
8	11:62381083	ROM1	NM_000327.4	c.339dup	p.(Leu114AlafsTer18)	frameshift	213	0.386	Step 1
8	10:118897459	VAX1	NM_001112704.2	c.109G>C	p.(Gly37Arg)	missense	94	0.414	Step 1
8	6:133767803	EYA4	NM_004100.5	c.119C>T	p.(Thr40Ile)	missense	109	0.495	Step 1
8	6:116600458	TSPYL1	NM_003309.4	c.536G>T	p.(Gly179Val)	missense	319	0.369	Step 1
8	8:12943382	DLC1	NM_182643.3	c.4525G>A	p.(Val1509Ile)	missense	109	0.568	Step 1
8	8:10467591	RP1L1	NM_178857.6	c.3971_4016del	p.(Glu1324GlyfsTer18)	frameshift	170	0.305	Step 1
8	8:10467586	RP1L1	NM_178857.6	c.4020_4021del	p.(Glu1340AspfsTer2)	frameshift	115	0.46	Step 1
8	4:144359688	GAB1	NM_002039.4	c.1130C>T	p.(Thr377Ile)	missense	188	0.5	Step 1
8	2:240912993	NDUFA10	NM_004544.4	c.1000-12401_1000-12391del		noncoding	102	0.519	Step 1
8	2:240912982	NDUFA10	NM_004544.4	c.1000-12389_1000-12380del		noncoding	106	0.49	Step 1
8	6:49416648	MMUT	NM_000255.4	c.1333-8C>T		noncoding	107	0.439	Step 1
8	2:228563937	SLC19A3	NM_025243.4	c.494C>A	p.(Ala165Glu)	missense	148	0.52	Step 1
8	3:52019387	ACY1	NM_000666.3	c.170G>A	p.(Gly57Asp)	missense	66	0.363	Step 1
8	3:186571011	ADIPOQ	NM_004797.4	c.164G>A	p.(Arg55His)	missense	349	0.512	Step 1
8	3:49212525	KLHDC8B	NM_173546.3	c.797G>A	p.(Arg266His)	missense	46	0.586	Step 1
8	3:47039946	NBEAL2	NM_015175.3	c.3119-7C>T		noncoding	24	0.625	Step 1
8	3:167510447	SERPINI1	NM_001122752.2	c.551T>A	p.(Val184Asp)	missense	128	0.359	Step 1
8	4:983940	SLC26A1	NM_022042.4	c.787G>A	p.(Asp263Asn)	missense	25	0.6	Step 1
8	2:11925128	LPIN1	NM_001349206.2	c.1475A>G	p.(Asp492Gly)	missense	205	0.448	Step 1
8	1:91403179	ZNF644	NM_201269.3	c.3551G>T	p.(Arg1184Met)	missense	163	0.533	Step 1
8	1:36565799	COL8A2	NM_005202.4	c.42_44dup	p.(Leu16dup)	inframe	60	0.516	Step 1
8	9:109689690	ZNF462	NM_021224.6	c.3497C>T	p.(Ser1166Phe)	missense	243	0.514	Step 1
8	8:30942713	WRN	NM_000553.6	c.1382C>T	p.(Thr461Met)	missense	81	0.296	Step 1
8	2:178592397	PDE11A	NM_016953.4	c.2032G>A	p.(Ala678Thr)	missense	110	0.563	Step 1
8	20:25062684	VSX1	NM_014588.6	c.49C>G	p.(Leu17Val)	missense	116	0.448	Step 1
8	7:6027035	PMS2	NM_000535.7	c.1361T>C	p.(Leu454Pro)	missense	182	0.412	Step 1
8	8:144808923	FAM83H	NM_198488.5	c.2708G>A	p.(Ser903Asn)	missense	37	0.324	Step 1
8	17:67303010	ABCA5	NM_172232.4	c.644C>A	p.(Thr215Asn)	missense	86	0.36	Step 1
8	10:88441364	LDB3	NM_007078.3	c.493C>T	p.(Arg165Trp)	missense	70	0.514	Step 1
8	7:99798392	STAG3	NM_001282717.2	c.1861C>T	p.(His621Tyr)	missense	87	0.459	Step 1
9	2:44047175	DYNC2LI1	NM_001348913.2	c.*16-7350G>T		noncoding	274	0.445	Step 1 and 2
9	9:140773612	CACNA1B	NM_000718.4	c.390+1_390+2insACGACACGGAGCCCTATTTCATCGGGATCTTTTGCTTCGAGGCAGGGATCAAAATCATCGCTCTGGGCTTTGTC		splice	183	0.322	Step 1 and 2
9	8:116599394	TRPS1	NM_014112.5	c.2534A>G	p.(Asn845Ser)	missense	615	0.487	Step 1 and 2
9	6:43006687	CUL7	NM_014780.5	c.4333C>T	p.(Arg1445Ter)	nonsense	150	0.513	Step 1,2 and 3
9	6:43006019	CUL7	NM_014780.5	c.4759C>T	p.(Gln1587Ter)	nonsense	470	0.48	Step 1,2 and 3
9	X:17745413	NHS	NM_001291867.2	c.3187C>G	p.(Leu1063Val)	missense	480	0.516	Step 1
9	9:98240437	PTCH1	NM_000264.5	c.1247C>G	p.(Thr416Ser)	missense	241	0.481	Step 1
9	7:75615394	POR	NM_001395413.1	c.1806+8G>A		noncoding	349	0.504	Step 1
9	3:142277459	ATR	NM_001184.4	c.1885+7G>A		noncoding	96	0.51	Step 1
9	14:105688243	BRF1	NM_001519.4	c.1057G>A	p.(Glu353Lys)	missense	403	0.471	Step 1
9	19:54684483	MBOAT7	NM_024298.5	c.854+7C>T		noncoding	33	0.454	Step 1
9	17:38975163	KRT10	NM_000421.5	c.1623_1624insAGCAGC	p.(Gly541_Tyr542insSerSer)	inframe	191	0.543	Step 1
9	17:38975162	KRT10	NM_000421.5	c.1625A>C	p.(Tyr542Ser)	missense	204	0.49	Step 1
9	17:38975148	KRT10	NM_000421.5	c.1637_1638del	p.(Ser546IlefsTer34)	frameshift	213	0.45	Step 1
9	16:88801297	PIEZO1	NM_001142864.4	c.1834C>G	p.(Leu612Val)	missense	325	0.476	Step 1
9	22:26422712	MYO18B	NM_032608.7	c.6772C>T	p.(Arg2258Trp)	missense	408	0.502	Step 1
9	16:88500629	ZNF469	NM_001367624.2	c.6751A>G	p.(Arg2251Gly)	missense	321	0.532	Step 1
9	14:57075939	TMEM260	NM_017799.4	c.752A>T	p.(Asp251Val)	missense	585	0.483	Step 1
9	15:74476275	STRA6	NM_022369.4	c.1222C>T	p.(Arg408Trp)	missense	208	0.519	Step 1
9	15:73016945	BBS4	NM_033028.5	c.536T>G	p.(Leu179Trp)	missense	241	0.394	Step 1
9	14:50100612	DNAAF2	NM_018139.3	c.1256A>T	p.(Glu419Val)	missense	171	0.45	Step 1
9	15:54007541	WDR72	NM_182758.4	c.363G>A	p.(Met121Ile)	missense	156	0.474	Step 1
9	16:1544464	TELO2	NM_016111.4	c.182C>A	p.(Pro61His)	missense	408	0.473	Step 1
9	13:48936980	RB1	NM_000321.3	c.748C>T	p.(Pro250Ser)	missense	154	0.525	Step 1
9	7:127975714	RBM28	NM_018077.3	c.829C>T	p.(Pro277Ser)	missense	290	0.51	Step 1
9	9:13119590	MPDZ	NM_001378778.1	c.5290G>A	p.(Gly1764Arg)	missense	374	0.494	Step 1
9	9:13140094	MPDZ	NM_001378778.1	c.3895C>A	p.(Pro1299Thr)	missense	346	0.476	Step 1
9	8:144994583	PLEC	NM_201384.3	c.9406G>A	p.(Ala3136Thr)	missense	367	0.501	Step 1
9	7:99367825	CYP3A4	NM_017460.6	c.352A>G	p.(Ile118Val)	missense	332	0.466	Step 1
9	5:13883070	DNAH5	NM_001369.3	c.3117G>C	p.(Glu1039Asp)	missense	521	0.47	Step 1
9	5:13866395	DNAH5	NM_001369.3	c.4054-4T>C		noncoding	86	0.36	Step 1
9	8:72156896	EYA1	NM_000503.6	c.1082G>A	p.(Arg361Gln)	missense	173	0.387	Step 1
9	10:71657246	COL13A1	NM_001368882.1	c.685-1207A>G		noncoding	197	0.472	Step 1
9	6:1611743	FOXC1	NM_001453.3	c.1063C>T	p.(Pro355Ser)	missense	16	0.5	Step 1
9	7:33312629	BBS9	NM_198428.3	c.709_712del	p.(Trp237LeufsTer2)	frameshift	440	0.447	Step 1
9	8:42977727	POMK	NM_032237.5	c.760G>A	p.(Val254Met)	missense	496	0.455	Step 1
9	5:131663031	SLC22A4	NM_003059.3	c.886A>G	p.(Ile296Val)	missense	143	0.524	Step 1
9	4:123844323	SPATA5	NM_145207.3	c.26G>T	p.(Arg9Leu)	missense	393	0.47	Step 1
9	4:122737588	EXOSC9	NM_005033.3	c.1221T>G	p.(Asn407Lys)	missense	35	0.571	Step 1
9	5:149777931	TCOF1	NM_001371623.1	c.4368del	p.(Glu1457LysfsTer119)	frameshift	3	0.666	Step 1
9	6:56463336	DST	NM_001374736.1	c.11866G>C	p.(Glu3956Gln)	missense	494	0.504	Step 1
9	2:238245091	COL6A3	NM_004369.4	c.8634_8651del	p.(Lys2881_Thr2886del)	inframe	1048	0.398	Step 1
9	2:232137737	ARMC9	NM_001352754.2	c.1280A>G	p.(Lys427Arg)	missense	310	0.49	Step 1
9	2:219540988	STK36	NM_015690.5	c.671G>A	p.(Ser224Asn)	missense	213	0.431	Step 1
9	6:12296268	EDN1	NM_001955.5	c.607C>T	p.(Arg203Cys)	missense	138	0.455	Step 1
9	3:47164966	SETD2	NM_014159.7	c.1160C>T	p.(Thr387Ile)	missense	507	0.514	Step 1
9	2:179540684	TTN	NM_001267550.2	c.34402_34416del	p.(Thr11468_Val11472del)	inframe	278	0.338	Step 1
9	2:179408930	TTN	NM_001267550.2	c.96026T>G	p.(Ile32009Arg)	missense	485	0.482	Step 1
9	3:189526119	TP63	NM_003722.5	c.383C>G	p.(Ser128Cys)	missense	400	0.487	Step 1
9	2:44047175	ABCG5	NM_022436.3	c.1528C>A	p.(His510Asn)	missense	274	0.445	Step 1
9	2:26647252	DRC1	NM_145038.5	c.470T>G	p.(Leu157Arg)	missense	127	0.448	Step 1
9	1:46660029	POMGNT1	NM_017739.4	c.796C>T	p.(Arg266Trp)	missense	377	0.541	Step 1
9	1:39833833	MACF1	NM_001394062.1	c.12785A>G	p.(Glu4262Gly)	missense	201	0.507	Step 1
9	1:16262667	SPEN	NM_015001.3	c.9932T>C	p.(Ile3311Thr)	missense	398	0.437	Step 1
9	11:64360934	SLC22A12	NM_144585.4	c.564G>A	p.(Thr188=)	synonymous	724	0.458	Step 1
9	12:21013995	SLCO1B3	NM_019844.4	c.404C>T	p.(Ser135Leu)	missense	68	0.5	Step 1
9	8:144810264	FAM83H	NM_198488.5	c.1358_1366del	p.(Leu453_Gln455del)	inframe	424	0.452	Step 1
9	5:90025579	ADGRV1	NM_032119.4	c.10547T>C	p.(Ile3516Thr)	missense	222	0.472	Step 1
9	3:10184659	VHL	NM_000551.4	c.340+788C>G		noncoding	568	0.485	Step 1
9	10:105927480	CFAP43	NM_025145.7	c.2707T>C	p.(Cys903Arg)	missense	245	0.42	Step 1
9	19:50208266	CPT1C	NM_001199753.2	c.774C>T	p.(Asp258=)	synonymous	258	0.55	Step 1
9	20:31585452	SUN5	NM_080675.4	c.381del	p.(Val128SerfsTer7)	frameshift	159	0.522	Step 1
9	20:5958549	MCM8	NM_032485.6	c.1423G>A	p.(Val475Met)	missense	558	0.469	Step 1
9	21:34648984	IL10RB	NM_000628.5	c.257C>G	p.(Thr86Ser)	missense	494	0.502	Step 1
9	22:50962195	SCO2	NM_005138.3	c.646G>A	p.(Glu216Lys)	missense	700	0.508	Step 1
9	17:36486335	GPR179	NM_001004334.4	c.3117A>T	p.(Lys1039Asn)	missense	766	0.5	Step 1
9	22:32242890	DEPDC5	NM_001242896.3	c.3092C>A	p.(Pro1031His)	missense	370	0.462	Step 1
9	22:32239732	DEPDC5	NM_001242896.3	c.2735G>A	p.(Arg912Gln)	missense	424	0.452	Step 1
9	16:81953124	PLCG2	NM_002661.5	c.2090G>A	p.(Arg697Gln)	missense	525	0.495	Step 1
9	16:57921800	CNGB1	NM_001297.5	c.3421G>A	p.(Ala1141Thr)	missense	634	0.488	Step 1
9	15:62199455	VPS13C	NM_020821.3	c.9105+8T>C		noncoding	215	0.493	Step 1
9	13:103710638	SLC10A2	NM_000452.3	c.472A>G	p.(Ile158Val)	missense	128	0.414	Step 1
9	11:70666754	SHANK2	NM_012309.5	c.1061G>A	p.(Arg354His)	missense	221	0.438	Step 1
9	12:39760300	KIF21A	NM_001173464.2	c.755A>C	p.(Lys252Thr)	missense	150	0.533	Step 1
9	11:65422042	RELA	NM_021975.4	c.1463C>T	p.(Thr488Ile)	missense	375	0.424	Step 1
9	11:118133740	MPZL2	NM_005797.4	c.131G>A	p.(Arg44Gln)	missense	219	0.525	Step 1
9	11:61724418	BEST1	NM_004183.4	c.584C>T	p.(Ala195Val)	missense	512	0.498	Step 1
9	12:14849376	GUCY2C	NM_004963.4	c.7A>T	p.(Thr3Ser)	missense	232	0.525	Step 1
9	11:18428773	LDHA	NM_005566.4	c.944G>A	p.(Arg315His)	missense	210	0.538	Step 1
9	12:121416448	HNF1A	NM_000545.8	c.-124G>C		UTR	243	0.485	Step 1
9	11:95825206	MAML2	NM_032427.4	c.1935_1988del	p.(Gln648_Gln665del)	inframe	628	0.364	Step 1
9	10:17275763	VIM	NM_003380.5	c.721-6T>C		noncoding	282	0.56	Step 1
9	6:170871054	TBP	NM_003194.5	c.231_246del	p.(Gln77HisfsTer62)	frameshift	88	0.535	Step 1
9	9:124044829	GSN	NM_198252.3	c.-10+989G>A		noncoding	196	0.459	Step 1
9	7:80303453	CD36	NM_001001548.3	c.1409C>T	p.(Thr470Ile)	missense	311	0.45	Step 1
9	7:80302116	CD36	NM_001001548.3	c.1156C>T	p.(Arg386Trp)	missense	144	0.534	Step 1
9	8:82598202	IMPA1	NM_005536.4	c.-25+281_-25+284dup		noncoding	150	0.473	Step 1
9	8:31497975	NRG1	NM_001159995.3	c.37+1028C>T		noncoding	202	0.509	Step 1
9	8:21980362	HR	NM_005144.5	c.1946C>T	p.(Thr649Met)	missense	239	0.481	Step 1
9	8:10467581	RP1L1	NM_178857.6	c.4026_4027insACAGAAGAAGGGCTGCAAGAAGAGGGGGTGCAGTTAGAGGAAACTAAAACAGAAGAAGGGCTGCAAGAAGAGGGGGTGCAGTTAGAGGGGACTAAA	p.(Lys1342_Glu1343insThrGluGluGlyLeuGlnGluGluGlyValGlnLeuGluGluThrLysThrGluGluGlyLeuGlnGluGluGlyValGlnLeuGluGlyThrLys)	inframe	524	0.37	Step 1
9	8:1871748	ARHGEF10	NM_014629.4	c.2374G>A	p.(Gly792Arg)	missense	166	0.481	Step 1
9	5:114506820	TRIM36	NM_018700.4	c.64-7371G>A		noncoding	584	0.428	Step 1
9	6:72926929	RIMS1	NM_014989.7	c.1679-16547C>T		noncoding	331	0.498	Step 1
9	5:37351423	NUP155	NM_153485.3	c.592A>G	p.(Met198Val)	missense	136	0.477	Step 1
9	6:42931177	GNMT	NM_018960.6	c.706C>T	p.(Pro236Ser)	missense	296	0.503	Step 1
9	6:42666128	PRPH2	NM_000322.5	c.946T>G	p.(Trp316Gly)	missense	307	0.501	Step 1
9	2:219029628	CXCR1	NM_000634.3	c.307T>C	p.(Trp103Arg)	missense	899	0.482	Step 1
9	3:4829725	ITPR1	NM_001378452.1	c.6710A>G	p.(Tyr2237Cys)	missense	189	0.518	Step 1
9	6:16327897	ATXN1	NM_001128164.2	c.642_645delinsTCAGCAT	p.(Gln214_Gln215delinsHisGlnHis)	inframe	211	0.328	Step 1
9	4:1347148	UVSSA	NM_020894.4	c.881G>A	p.(Arg294Gln)	missense	201	0.482	Step 1
9	2:25059814	ADCY3	NM_004036.5	c.1634C>T	p.(Ser545Leu)	missense	258	0.464	Step 1
9	2:74592249	DCTN1	NM_004082.5	c.3149G>C	p.(Gly1050Ala)	missense	540	0.459	Step 1
9	1:186135309	HMCN1	NM_031935.3	c.15320-7C>T		noncoding	190	0.515	Step 1
9	1:150049795	VPS45	NM_007259.5	c.625G>T	p.(Val209Phe)	missense	208	0.524	Step 1
9	6:119136931	MCM9	NM_017696.3	c.2488G>A	p.(Ala830Thr)	missense	839	0.492	Step 1
9	1:245020909	HNRNPU	NM_031844.3	c.1605T>G	p.(Asp535Glu)	missense	257	0.494	Step 1
9	2:113514311	CKAP2L	NM_152515.5	c.637T>C	p.(Ser213Pro)	missense	627	0.414	Step 1
9	10:17126314	CUBN	NM_001081.4	c.2257G>A	p.(Val753Met)	missense	562	0.494	Step 1
9	10:120917556	SFXN4	NM_213649.2	c.379C>T	p.(Pro127Ser)	missense	257	0.478	Step 1
9	4:103553312	MANBA	NM_005908.4	c.2542G>A	p.(Glu848Lys)	missense	247	0.477	Step 1
9	2:186659962	FSIP2	NM_173651.4	c.8099A>T	p.(Lys2700Met)	missense	253	0.458	Step 1
9	2:182542624	NEUROD1	NM_002500.5	c.964G>A	p.(Ala322Thr)	missense	437	0.469	Step 1
9	2:182542623	NEUROD1	NM_002500.5	c.965C>A	p.(Ala322Asp)	missense	439	0.469	Step 1
9	1:152286020	FLG	NM_002016.2	c.1342C>A	p.(Gln448Lys)	missense	1302	0.485	Step 1
9	1:152283952	FLG	NM_002016.2	c.3410G>T	p.(Ser1137Ile)	missense	1546	0.472	Step 1
10	6:43011303	CUL7	NM_014780.5	c.3237del	p.(Phe1080SerfsTer61)	frameshift	184	0.467	Step 1,2 and 3
10	6:43015891	CUL7	NM_014780.5	c.2164C>T	p.(Arg722Ter)	nonsense	256	0.527	Step 1,2 and 3
10	1:220316300	IARS2	NM_018060.4	c.2575T>C	p.(Phe859Leu)	missense	352	0.448	Step 1 and 2
10	2:219919943	IHH	NM_002181.4	c.1222G>A	p.(Gly408Arg)	missense	151	0.509	Step 1 and 2
10	10:79769438	POLR3A	NM_007055.4	c.1771-5C>A		noncoding	282	0.528	Step 1 and 2
10	15:89402346	ACAN	NM_001369268.1	c.6530T>C	p.(Val2177Ala)	missense	326	0.487	Step 1
10	17:59871056	BRIP1	NM_032043.3	c.1375A>G	p.(Arg459Gly)	missense	215	0.52	Step 1
10	1:231473390	EXOC8	NM_175876.5	c.102G>C	p.(Gln34His)	missense	206	0.533	Step 1
10	1:179852117	TOR1AIP1	NM_015602.4	c.475+5G>A		noncoding	117	0.615	Step 1
10	1:97544660	DPYD	NM_000110.4	c.2950G>A	p.(Asp984Asn)	missense	452	0.495	Step 1
10	1:27124066	PIGV	NM_017837.4	c.1213T>A	p.(Phe405Ile)	missense	454	0.484	Step 1
10	1:39823192	MACF1	NM_001394062.1	c.11570A>G	p.(Gln3857Arg)	missense	339	0.46	Step 1
10	2:179414201	TTN	NM_001267550.2	c.92153-1G>T		splice	269	0.535	Step 1
10	2:179436817	TTN	NM_001267550.2	c.74042A>G	p.(Gln24681Arg)	missense	486	0.456	Step 1
10	2:179466097	TTN	NM_001267550.2	c.55627C>A	p.(Leu18543Ile)	missense	438	0.515	Step 1
10	2:179613112	TTN	NM_001267550.2	c.11311+4739C>T		noncoding	401	0.468	Step 1
10	2:179615727	TTN	NM_001267550.2	c.11311+2124A>C		noncoding	434	0.534	Step 1
10	2:179634520	TTN	NM_001267550.2	c.8788G>A	p.(Val2930Ile)	missense	361	0.49	Step 1
10	2:179514313	TTN	NM_001267550.2	c.39941C>A	p.(Thr13314Asn)	missense	348	0.465	Step 1
10	2:179529213	TTN	NM_001267550.2	c.36254A>G	p.(Gln12085Arg)	missense	272	0.503	Step 1
10	1:154698394	KCNN3	NM_002249.6	c.1699C>A	p.(Arg567=)	synonymous	203	0.453	Step 1
10	1:155161783	MUC1	NM_001371720.1	c.377A>G	p.(Asp126Gly)	missense	139	0.284	Step 1
10	1:155161799	MUC1	NM_001371720.1	c.361A>G	p.(Thr121Ala)	missense	175	0.323	Step 1
10	1:155161810	MUC1	NM_001371720.1	c.350T>C	p.(Leu117Pro)	missense	200	0.351	Step 1
10	5:60839434	ZSWIM6	NM_020928.2	c.2938G>A	p.(Ala980Thr)	missense	430	0.513	Step 1
10	5:68840804	OCLN	NM_001205254.2	c.1111G>A	p.(Gly371Ser)	missense	167	0.359	Step 1
10	2:241696837	KIF1A	NM_001244008.2	c.2751_2753del	p.(Glu917del)	inframe	123	0.986	Step 1
10	4:83763422	SEC31A	NM_001077207.4	c.2839C>A	p.(Pro947Thr)	missense	319	0.485	Step 1
10	3:48626874	COL7A1	NM_000094.4	c.2200G>A	p.(Glu734Lys)	missense	337	0.448	Step 1
10	7:139717592	TBXAS1	NM_001061.7	c.1486G>A	p.(Val496Met)	missense	321	0.467	Step 1
10	5:145508352	LARS1	NM_020117.11	c.2770-7C>T		noncoding	279	0.516	Step 1
10	7:26232892	HNRNPA2B1	NM_002137.4	c.943A>G	p.(Met315Val)	missense	425	0.494	Step 1
10	10:89473069	PAPSS2	NM_001015880.2	c.381+22_381+24del		noncoding	38	0.473	Step 1
10	9:35737570	GBA2	NM_020944.3	c.2506-126T>C		noncoding	110	0.536	Step 1
10	9:71852884	TJP2	NM_004817.4	c.2270C>T	p.(Thr757Ile)	missense	195	0.456	Step 1
10	10:105831792	COL17A1	NM_000494.4	c.461G>A	p.(Arg154Gln)	missense	189	0.486	Step 1
10	11:117281550	CEP164	NM_014956.5	c.4103T>C	p.(Ile1368Thr)	missense	96	0.5	Step 1
10	6:152419955	ESR1	NM_000125.4	c.1642C>T	p.(Arg548Cys)	missense	277	0.523	Step 1
10	13:108861474	LIG4	NM_206937.2	c.2143T>A	p.(Ser715Thr)	missense	455	0.472	Step 1
10	9:134015936	NUP214	NM_005085.4	c.1133G>A	p.(Ser378Asn)	missense	199	0.517	Step 1
10	9:135773000	TSC1	NM_000368.5	c.2626-3C>T		noncoding	67	0.631	Step 1
10	16:624142	PIGQ	NM_004204.5	c.68G>A	p.(Trp23Ter)	nonsense	192	0.468	Step 1
10	16:2550849	TBC1D24	NM_001199107.2	c.1570C>T	p.(Arg524Trp)	missense	222	0.504	Step 1
10	17:73736065	ITGB4	NM_000213.5	c.2359C>T	p.(Arg787Cys)	missense	290	0.493	Step 1
10	21:47549377	COL6A2	NM_001849.4	c.2462-2491A>T		noncoding	258	0.465	Step 1
10	12:52200990	SCN8A	NM_001330260.2	c.5720G>A	p.(Arg1907Gln)	missense	375	0.49	Step 1
10	19:48815267	ODAD1	NM_001364171.2	c.467A>G	p.(Glu156Gly)	missense	374	0.5	Step 1
10	19:50368547	PNKP	NM_007254.4	c.335C>G	p.(Pro112Arg)	missense	425	0.468	Step 1
10	16:70286677	AARS1	NM_001605.3	c.2854C>G	p.(Leu952Val)	missense	234	0.482	Step 1
10	16:88499735	ZNF469	NM_001367624.2	c.5857G>C	p.(Gly1953Arg)	missense	334	0.488	Step 1
10	16:88502138	ZNF469	NM_001367624.2	c.8260G>A	p.(Gly2754Arg)	missense	383	0.498	Step 1
10	1:65830314	DNAJC6	NM_001256864.2	c.194-4G>A		noncoding	120	0.591	Step 1
10	1:169529854	F5	NM_000130.5	c.524A>G	p.(His175Arg)	missense	364	0.513	Step 1
10	7:137791341	AKR1D1	NM_005989.4	c.580-13T>A		noncoding	229	0.462	Step 1
10	10:61834748	ANK3	NM_020987.5	c.5891A>C	p.(Lys1964Thr)	missense	496	0.461	Step 1
10	11:836085	CD151	NM_004357.5	c.16G>A	p.(Glu6Lys)	missense	256	0.417	Step 1
10	1:231557538	EGLN1	NM_022051.3	c.97T>C	p.(Cys33Arg)	missense	17	0.588	Step 1
10	5:1403195	SLC6A3	NM_001044.5	c.1609G>A	p.(Val537Met)	missense	200	0.485	Step 1
10	5:1414807	SLC6A3	NM_001044.5	c.1155C>T	p.(Asp385=)	synonymous	300	0.526	Step 1
10	5:70855821	BDP1	NM_018429.3	c.7254_7256del	p.(Gly2419del)	inframe	150	0.406	Step 1
10	5:70855825	BDP1	NM_018429.3	c.7257_7258insATAT	p.(Gln2420IlefsTer23)	frameshift	152	0.407	Step 1
10	5:70855826	BDP1	NM_018429.3	c.7259_7260insTA	p.(Gln2420HisfsTer12)	frameshift	153	0.398	Step 1
10	2:240944672	NDUFA10	NM_004544.4	c.845C>T	p.(Pro282Leu)	missense	210	0.476	Step 1
10	4:3516476	LRPAP1	NM_002337.4	c.1011+3G>A		noncoding	150	0.5	Step 1
10	4:3520638	LRPAP1	NM_002337.4	c.552C>A	p.(His184Gln)	missense	195	0.502	Step 1
10	6:10556787	GCNT2	NM_145649.5	c.925+26718T>G		noncoding	388	0.515	Step 1
10	7:33057089	NT5C3A	NM_001002010.5	c.655G>A	p.(Val219Ile)	missense	322	0.493	Step 1
10	9:2718557	KCNV2	NM_133497.4	c.818C>T	p.(Ser273Phe)	missense	174	0.431	Step 1
10	9:12694339	TYRP1	NM_000550.3	c.343C>G	p.(Pro115Ala)	missense	302	0.377	Step 1
10	8:10480278	RP1L1	NM_178857.6	c.434G>C	p.(Arg145Pro)	missense	336	0.485	Step 1
10	10:70645099	STOX1	NM_152709.5	c.1547C>T	p.(Thr516Met)	missense	507	0.53	Step 1
10	6:64430513	EYS	NM_001142800.2	c.9414T>G	p.(Asp3138Glu)	missense	307	0.504	Step 1
10	10:82039991	MAT1A	NM_000429.3	c.487C>T	p.(Arg163Trp)	missense	235	0.476	Step 1
10	12:124411298	DNAH10	NM_001372106.1	c.12038del	p.(Leu4013Ter)	frameshift	361	0.515	Step 1
10	9:136321307	ADAMTS13	NM_139027.6	c.3517G>A	p.(Val1173Ile)	missense	209	0.454	Step 1
10	9:136597600	SARDH	NM_001134707.2	c.455G>C	p.(Gly152Ala)	missense	226	0.517	Step 1
10	17:56272476	EPX	NM_000502.6	c.746C>A	p.(Ala249Glu)	missense	311	0.485	Step 1
10	16:11650423	LITAF	NM_001136472.2	c.164G>A	p.(Gly55Asp)	missense	390	0.528	Step 1
10	15:62205612	VPS13C	NM_020821.3	c.8448A>G	p.(Val2816=)	synonymous	291	0.539	Step 1
10	12:40668473	LRRK2	NM_198578.4	c.1745T>C	p.(Leu582Pro)	missense	226	0.548	Step 1
10	21:19666961	TMPRSS15	NM_002772.3	c.2270G>C	p.(Cys757Ser)	missense	143	0.503	Step 1
10	21:34652209	IL10RB	NM_000628.5	c.484G>A	p.(Gly162Ser)	missense	281	0.434	Step 1
10	18:33785138	MOCOS	NM_017947.4	c.1117C>T	p.(Arg373Trp)	missense	256	0.515	Step 1
10	22:29885976	NEFH	NM_021076.4	c.2347G>T	p.(Glu783Ter)	nonsense	511	0.544	Step 1
10	12:64015041	DPY19L2	NM_173812.5	c.1030G>T	p.(Ala344Ser)	missense	53	0.377	Step 1
10	12:72338080	TPH2	NM_173353.4	c.262C>T	p.(Arg88Cys)	missense	335	0.498	Step 1
10	19:8436015	ANGPTL4	NM_139314.3	c.737C>T	p.(Ala246Val)	missense	167	0.437	Step 1
10	1:55509585	PCSK9	NM_174936.4	c.277C>T	p.(Arg93Cys)	missense	198	0.535	Step 1
10	11:67810471	TCIRG1	NM_006019.4	c.476G>A	p.(Gly159Glu)	missense	99	0.525	Step 1
10	1:2338036	PEX10	NM_002617.4	c.799G>A	p.(Val267Ile)	missense	115	0.452	Step 1
10	3:38622661	SCN5A	NM_000335.5	c.2989G>A	p.(Ala997Thr)	missense	185	0.486	Step 1
10	6:51947254	PKHD1	NM_138694.4	c.217C>T	p.(Arg73Trp)	missense	261	0.524	Step 1
10	1:152285839	FLG	NM_002016.2	c.1523C>T	p.(Ala508Val)	missense	936	0.487	Step 1
10	18:6949209	LAMA1	NM_005559.4	c.8447G>A	p.(Arg2816Gln)	missense	244	0.508	Step 1
10	18:7013921	LAMA1	NM_005559.4	c.3256G>A	p.(Asp1086Asn)	missense	401	0.448	Step 1
10	16:58001052	CNGB1	NM_001297.5	c.139G>A	p.(Glu47Lys)	missense	300	0.516	Step 1
11	2:20160318	WDR35	NM_020779.4	c.1252A>G	p.(Ile418Val)	missense	63	0.587	Step 1 and 2
11	11:103057145	DYNC2H1	NM_001377.3	c.6808C>T	p.(Arg2270Ter)	nonsense	167	0.508	Step 1,2 and 3
11	11:103029645	DYNC2H1	NM_001377.3	c.4267C>T	p.(Arg1423Cys)	missense	168	0.482	Step 1,2 and 3
11	3:183882995	DVL3	NM_004423.4	c.693+2_693+4del		noncoding	190	0.452	Step 1 and 2
11	22:50304261	ALG12	NM_024105.4	c.296-8_296-7del		noncoding	240	0.512	Step 1 and 2
11	6:43005430	CUL7	NM_014780.5	c.5093G>A	p.(Arg1698Gln)	missense	259	0.513	Step 1 and 2
11	X:605190	SHOX	NM_000451.4	c.698C>T	p.(Ala233Val)	missense	814	0.54	Step 1 and 2
11	16:89836305	FANCA	NM_000135.4	c.2444C>G	p.(Pro815Arg)	missense	261	0.486	Step 1
11	16:89813029	FANCA	NM_000135.4	c.3476G>C	p.(Cys1159Ser)	missense	212	0.49	Step 1
11	4:128621168	INTU	NM_015693.4	c.1453G>A	p.(Glu485Lys)	missense	51	0.568	Step 1
11	X:108904766	ACSL4	NM_001318510.2	c.1691C>T	p.(Ala564Val)	missense	65	1	Step 1
11	19:50370401	PNKP	NM_007254.4	c.61C>G	p.(Pro21Ala)	missense	390	0.476	Step 1
11	19:41003435	SPTBN4	NM_020971.3	c.708T>A	p.(Asn236Lys)	missense	154	0.409	Step 1
11	19:39997736	DLL3	NM_203486.3	c.1151C>G	p.(Ala384Gly)	missense	199	0.467	Step 1
11	22:20051108	TANGO2	NM_152906.7	c.710+143G>C		noncoding	367	0.531	Step 1
11	22:19468563	CDC45	NM_003504.5	c.199G>C	p.(Glu67Gln)	missense	184	0.532	Step 1
11	19:2132475	AP3D1	NM_001261826.3	c.457A>G	p.(Thr153Ala)	missense	230	0.508	Step 1
11	17:2577571	PAFAH1B1	NM_000430.4	c.889A>G	p.(Thr297Ala)	missense	127	0.472	Step 1
11	17:72759554	SLC9A3R1	NM_004252.5	c.652G>A	p.(Ala218Thr)	missense	281	0.419	Step 1
11	17:17697101	RAI1	NM_030665.4	c.840_846del	p.(Gln280HisfsTer82)	frameshift	303	0.613	Step 1
11	17:61559827	ACE	NM_000789.4	c.1119G>T	p.(Arg373Ser)	missense	227	0.484	Step 1
11	15:49048668	CEP152	NM_001194998.2	c.2777A>T	p.(Glu926Val)	missense	394	0.484	Step 1
11	16:88791441	PIEZO1	NM_001142864.4	c.4210C>T	p.(Arg1404Trp)	missense	157	0.407	Step 1
11	16:88786597	PIEZO1	NM_001142864.4	c.6044T>C	p.(Met2015Thr)	missense	507	0.5	Step 1
11	14:105173862	INF2	NM_022489.4	c.1280_1285del	p.(Pro427_Pro428del)	inframe	161	0.459	Step 1
11	14:102898297	TECPR2	NM_014844.5	c.1249G>A	p.(Asp417Asn)	missense	177	0.463	Step 1
11	16:2550849	TBC1D24	NM_001199107.2	c.1570C>T	p.(Arg524Trp)	missense	720	0.479	Step 1
11	11:47311339	MADD	NM_001376571.1	c.2817-79G>A		noncoding	107	0.467	Step 1
11	9:32973572	APTX	NM_001195248.2	c.953G>A	p.(Arg318His)	missense	143	0.517	Step 1
11	12:66786270	GRIP1	NM_001366722.1	c.2282C>T	p.(Ser761Leu)	missense	225	0.484	Step 1
11	9:139391688	NOTCH1	NM_017617.5	c.6503G>A	p.(Cys2168Tyr)	missense	773	0.491	Step 1
11	9:137727015	COL5A1	NM_000093.5	c.5335A>G	p.(Asn1779Asp)	missense	390	0.484	Step 1
11	7:105207694	RINT1	NM_021930.6	c.2315T>C	p.(Leu772Pro)	missense	108	0.518	Step 1
11	6:129759824	LAMA2	NM_000426.4	c.6002G>A	p.(Arg2001Lys)	missense	102	0.47	Step 1
11	6:116756772	DSE	NM_013352.4	c.1141G>C	p.(Val381Leu)	missense	297	0.481	Step 1
11	9:86591970	HNRNPK	NM_031263.4	c.157-4C>T		noncoding	115	0.521	Step 1
11	4:154215458	TRIM2	NM_015271.5	c.607C>A	p.(Leu203Ile)	missense	109	0.385	Step 1
11	4:122768626	BBS7	NM_176824.3	c.970A>G	p.(Lys324Glu)	missense	176	0.534	Step 1
11	5:13830178	DNAH5	NM_001369.3	c.6206A>G	p.(Asp2069Gly)	missense	191	0.471	Step 1
11	3:44893381	KIF15	NM_020242.3	c.3909G>T	p.(Gln1303His)	missense	151	0.463	Step 1
11	4:85658390	WDFY3	NM_014991.6	c.6704C>G	p.(Thr2235Arg)	missense	191	0.554	Step 1
11	4:79443907	FRAS1	NM_025074.7	c.10753G>A	p.(Ala3585Thr)	missense	150	0.453	Step 1
11	2:238270470	COL6A3	NM_004369.4	c.6068A>G	p.(Asn2023Ser)	missense	389	0.493	Step 1
11	2:179424280	TTN	NM_001267550.2	c.86579A>C	p.(Glu28860Ala)	missense	527	0.508	Step 1
11	2:197184538	HECW2	NM_001348768.2	c.1076G>A	p.(Gly359Glu)	missense	402	0.587	Step 1
11	1:241661240	FH	NM_000143.4	c.1421C>G	p.(Thr474Arg)	missense	345	0.504	Step 1
11	2:152447903	NEB	NM_001164508.2	c.14893G>A	p.(Gly4965Arg)	missense	788	0.251	Step 1
11	2:152382685	NEB	NM_001164508.2	c.22037A>T	p.(Asn7346Ile)	missense	431	0.477	Step 1
11	1:186276398	PRG4	NM_005807.6	c.1547C>T	p.(Pro516Leu)	missense	954	0.328	Step 1
11	1:173797503	DARS2	NM_018122.5	c.260A>G	p.(Asp87Gly)	missense	184	0.44	Step 1
11	2:21229040	APOB	NM_000384.3	c.10700C>T	p.(Thr3567Met)	missense	571	0.478	Step 1
11	1:26140638	SELENON	NM_020451.3	c.1578_1580del	p.(Met526del)	inframe	200	0.465	Step 1
11	17:39767355	KRT16	NM_005557.4	c.899A>G	p.(Asn300Ser)	missense	275	0.447	Step 1
11	18:19053049	GREB1L	NM_001142966.3	c.2240A>G	p.(Lys747Arg)	missense	143	0.419	Step 1
11	14:24002602	ZFHX2	NM_033400.3	c.1933A>G	p.(Thr645Ala)	missense	314	0.445	Step 1
11	15:31221574	FAN1	NM_014967.5	c.2761C>T	p.(Arg921Cys)	missense	184	0.494	Step 1
11	14:89061158	ZC3H14	NM_024824.5	c.1280-1920T>G		noncoding	205	0.482	Step 1
11	15:89862170	POLG	NM_002693.3	c.3265C>G	p.(Gln1089Glu)	missense	247	0.51	Step 1
11	7:100778864	SERPINE1	NM_000602.5	c.989C>T	p.(Thr330Met)	missense	135	0.466	Step 1
11	10:73461953	CDH23	NM_022124.6	c.2572G>A	p.(Val858Ile)	missense	575	0.54	Step 1
11	10:73405729	CDH23	NM_022124.6	c.1282G>A	p.(Asp428Asn)	missense	358	0.46	Step 1
11	6:137524704	IFNGR1	NM_000416.3	c.665A>G	p.(His222Arg)	missense	195	0.594	Step 1
11	7:21630947	DNAH11	NM_001277115.2	c.2419G>C	p.(Asp807His)	missense	495	0.503	Step 1
11	6:170154123	ERMARD	NM_018341.3	c.170A>G	p.(Glu57Gly)	missense	105	0.419	Step 1
11	5:86669962	RASA1	NM_002890.3	c.1777-3del		noncoding	41	0.461	Step 1
11	3:123452797	MYLK	NM_053025.4	c.1046C>T	p.(Ala349Val)	missense	687	0.47	Step 1
11	3:49167131	LAMB2	NM_002292.4	c.1424G>C	p.(Arg475Pro)	missense	262	0.438	Step 1
11	1:215987206	USH2A	NM_206933.4	c.9611A>G	p.(His3204Arg)	missense	195	0.564	Step 1
11	20:34262273	NFS1	NM_021100.5	c.1135A>G	p.(Ser379Gly)	missense	152	0.578	Step 1
11	22:46776852	CELSR1	NM_001378328.1	c.7089G>C	p.(Arg2363=)	synonymous	143	0.531	Step 1
11	20:941071	RSPO4	NM_001029871.4	c.634C>T	p.(Arg212Cys)	missense	341	0.466	Step 1
11	19:15651325	CYP4F22	NM_173483.4	c.736C>T	p.(Arg246Cys)	missense	282	0.46	Step 1
11	21:44592175	CRYAA	NM_000394.4	c.313-6C>T		noncoding	558	0.415	Step 1
11	19:41509934	CYP2B6	NM_000767.5	c.200C>A	p.(Thr67Lys)	missense	326	0.493	Step 1
11	20:60894789	LAMA5	NM_005560.6	c.6822T>A	p.(His2274Gln)	missense	320	0.415	Step 1
11	22:35779222	HMOX1	NM_002133.3	c.144+3A>T		noncoding	184	0.478	Step 1
11	17:78078642	GAA	NM_000152.5	c.257C>G	p.(Pro86Arg)	missense	514	0.486	Step 1
11	16:57283678	ARL2BP	NM_012106.4	c.208-1G>A		splice	107	0.364	Step 1
11	18:61645628	SERPINB8	NM_002640.4	c.86T>C	p.(Phe29Ser)	missense	214	0.528	Step 1
11	16:31500595	SLC5A2	NM_003041.4	c.1601T>C	p.(Phe534Ser)	missense	585	0.492	Step 1
11	18:12356686	AFG3L2	NM_006796.3	c.1164+3_1164+6del		noncoding	168	0.482	Step 1
11	14:76964643	ESRRB	NM_001379180.1	c.1207C>T	p.(Arg403Cys)	missense	109	0.495	Step 1
11	15:86822897	AGBL1	NM_001386094.1	c.2104dup	p.(Ala702GlyfsTer22)	frameshift	339	0.536	Step 1
11	11:17667382	OTOG	NM_001292063.2	c.8633G>A	p.(Arg2878His)	missense	280	0.517	Step 1
11	11:111626165	PPP2R1B	NM_002716.5	c.697C>T	p.(Arg233Cys)	missense	116	0.551	Step 1
11	11:102709977	MMP3	NM_002422.5	c.936-3T>G		noncoding	80	0.6	Step 1
11	9:713198	KANK1	NM_015158.5	c.2432C>T	p.(Pro811Leu)	missense	291	0.491	Step 1
11	12:45610105	ANO6	NM_001025356.3	c.1A>T		start_lost	186	0.526	Step 1
11	10:95849047	PLCE1	NM_016341.4	c.1207-42884G>T		noncoding	638	0.506	Step 1
11	7:91694749	AKAP9	NM_005751.5	c.6182A>T	p.(Gln2061Leu)	missense	76	0.381	Step 1
11	7:143039162	CLCN1	NM_000083.3	c.1723C>T	p.(Pro575Ser)	missense	237	0.514	Step 1
11	5:82786033	VCAN	NM_004385.5	c.187C>T	p.(Arg63Cys)	missense	361	0.504	Step 1
11	3:53842681	CACNA1D	NM_001128840.3	c.5755C>T	p.(Arg1919Trp)	missense	197	0.487	Step 1
11	4:652754	PDE6B	NM_000283.4	c.1415G>A	p.(Arg472His)	missense	148	0.513	Step 1
11	3:49933455	MST1R	NM_002447.4	c.2734dup	p.(Asp912GlyfsTer27)	frameshift	352	0.485	Step 1
11	1:155263001	PKLR	NM_000298.6	c.1403C>G	p.(Ala468Gly)	missense	356	0.502	Step 1
11	2:29287938	PCARE	NM_001029883.3	c.3669-5G>A		noncoding	253	0.509	Step 1
11	2:27721631	GCKR	NM_001486.4	c.395C>T	p.(Pro132Leu)	missense	174	0.413	Step 1
11	1:113657078	LRIG2	NM_014813.3	c.2110G>A	p.(Asp704Asn)	missense	180	0.46	Step 1
11	17:41738713	MEOX1	NM_004527.4	c.190G>A	p.(Ala64Thr)	missense	395	0.536	Step 1
11	18:21494466	LAMA3	NM_198129.4	c.7422C>A	p.(Asp2474Glu)	missense	215	0.493	Step 1
11	14:95562449	DICER1	NM_177438.3	c.4808T>C	p.(Leu1603Pro)	missense	439	0.48	Step 1
11	6:157099454	ARID1B	NM_001374828.1	c.640C>A	p.(Gln214Lys)	missense	153	0.49	Step 1
11	9:109688261	ZNF462	NM_021224.6	c.2068G>A	p.(Val690Met)	missense	377	0.474	Step 1
11	1:39792931	MACF1	NM_001394062.1	c.4520A>G	p.(Asn1507Ser)	missense	84	0.273	Step 1
11	15:40247894	EIF2AK4	NM_001013703.4	c.668C>G	p.(Ala223Gly)	missense	192	0.437	Step 1
11	1:240371442	FMN2	NM_020066.5	c.3372_3404del	p.(Gly1137_Pro1147del)	inframe	247	0.323	Step 1
11	2:182543554	NEUROD1	NM_002500.5	c.34G>C	p.(Gly12Arg)	missense	508	0.464	Step 1
11	1:27699644	FCN3	NM_003665.4	c.376G>A	p.(Glu126Lys)	missense	240	0.454	Step 1
12	2:166805910	TTC21B	NM_024753.5	c.256A>C	p.(Asn86His)	missense	68	0.411	Step 1 and 2
12	8:145665472	TONSL	NM_013432.5	c.1412C>T	p.(Ala471Val)	missense	173	0.41	Step 1 and 2
12	X:48382373	EBP	NM_006579.3	c.214T>C	p.(Cys72Arg)	missense	426	0.481	Step 1,2 and 3
12	1:17322505	ATP13A2	NM_022089.4	c.1507del	p.(Leu503TrpfsTer21)	frameshift	150	0.433	Step 1
12	1:17322512	ATP13A2	NM_022089.4	c.1501A>T	p.(Ile501Phe)	missense	154	0.435	Step 1
12	X:153297826	MECP2	NM_001110792.2	c.245C>G	p.(Ser82Cys)	missense	325	0.476	Step 1
12	20:31374380	DNMT3B	NM_006892.4	c.379C>T	p.(Arg127Trp)	missense	143	0.503	Step 1
12	18:9122637	NDUFV2	NM_021074.5	c.427C>T	p.(Arg143Ter)	nonsense	72	0.458	Step 1
12	19:2113345	AP3D1	NM_001261826.3	c.2663_2668dup	p.(Ala888_Pro889dup)	inframe	23	0.26	Step 1
12	17:8140734	CTC1	NM_025099.6	c.751A>G	p.(Arg251Gly)	missense	136	0.441	Step 1
12	20:62294237	RTEL1	NM_001283009.2	c.533T>C	p.(Val178Ala)	missense	253	0.47	Step 1
12	16:3860762	CREBBP	NM_004380.3	c.817A>T	p.(Thr273Ser)	missense	95	0.505	Step 1
12	16:3778708	CREBBP	NM_004380.3	c.6340G>A	p.(Gly2114Ser)	missense	293	0.457	Step 1
12	16:2121610	TSC2	NM_000548.5	c.1939G>A	p.(Asp647Asn)	missense	177	0.468	Step 1
12	15:80743274	ARNT2	NM_014862.4	c.85G>A	p.(Ala29Thr)	missense	131	0.381	Step 1
12	15:63950875	HERC1	NM_003922.4	c.9467C>T	p.(Thr3156Met)	missense	69	0.463	Step 1
12	17:48694870	CACNA1G	NM_018896.5	c.5093A>G	p.(Asn1698Ser)	missense	161	0.459	Step 1
12	15:49031404	CEP152	NM_001194998.2	c.4175T>C	p.(Ile1392Thr)	missense	189	0.492	Step 1
12	14:51230545	NIN	NM_020921.4	c.1773C>T	p.(His591=)	synonymous	72	0.43	Step 1
12	12:56487560	ERBB3	NM_001982.4	c.1493A>T	p.(Lys498Ile)	missense	129	0.496	Step 1
12	12:7045891	ATN1	NM_001940.4	c.1503_1508del	p.(Gln501_Gln502del)	inframe	180	0.444	Step 1
12	7:157202635	DNAJB6	NM_058246.4	c.838G>A	p.(Glu280Lys)	missense	133	0.511	Step 1
12	7:157160173	DNAJB6	NM_058246.4	c.342C>A	p.(Phe114Leu)	missense	152	0.453	Step 1
12	9:131733033	NUP188	NM_015354.3	c.913-4C>G		noncoding	125	0.496	Step 1
12	6:31747039	VARS1	NM_006295.3	c.3431G>A	p.(Gly1144Asp)	missense	150	0.5	Step 1
12	5:71496063	MAP1B	NM_005909.5	c.6881A>C	p.(Glu2294Ala)	missense	214	0.462	Step 1
12	9:35546799	RUSC2	NM_014806.5	c.281C>T	p.(Pro94Leu)	missense	222	0.463	Step 1
12	9:3828361	GLIS3	NM_001042413.2	c.2704C>T	p.(Arg902Cys)	missense	111	0.522	Step 1
12	3:132405122	NPHP3	NM_153240.5	c.3311A>G	p.(Tyr1104Cys)	missense	85	0.517	Step 1
12	8:144998557	PLEC	NM_201384.3	c.5540G>A	p.(Arg1847Gln)	missense	193	0.507	Step 1
12	8:144994007	PLEC	NM_201384.3	c.9982T>A	p.(Phe3328Ile)	missense	239	0.481	Step 1
12	5:127872127	FBN2	NM_001999.4	c.305A>G	p.(Lys102Arg)	missense	117	0.41	Step 1
12	5:127645097	FBN2	NM_001999.4	c.5201-7del		noncoding	117	0.487	Step 1
12	3:47451778	PTPN23	NM_015466.4	c.2490G>C	p.(Glu830Asp)	missense	352	0.525	Step 1
12	6:83888401	PGM3	NM_015599.3	c.1020A>C	p.(Glu340Asp)	missense	31	0.354	Step 1
12	6:56484432	DST	NM_001374736.1	c.4929+4896G>T		noncoding	229	0.467	Step 1
12	3:9731811	MTMR14	NM_001077525.3	c.1597G>A	p.(Glu533Lys)	missense	202	0.43	Step 1
12	2:217347563	SMARCAL1	NM_014140.4	c.2728A>C	p.(Ser910Arg)	missense	76	0.447	Step 1
12	2:174086160	MAP3K20	NM_016653.3	c.987+4182A>G		noncoding	116	0.491	Step 1
12	4:527746	PIGG	NM_001127178.3	c.2711A>C	p.(His904Pro)	missense	123	0.593	Step 1
12	2:179469756	TTN	NM_001267550.2	c.54148C>T	p.(Arg18050Cys)	missense	206	0.456	Step 1
12	2:152522671	NEB	NM_001164508.2	c.4964A>G	p.(His1655Arg)	missense	251	0.541	Step 1
12	2:121732501	GLI2	NM_001374353.1	c.1183-50G>A		noncoding	133	0.421	Step 1
12	2:27535856	MPV17	NM_002437.5	c.186+5G>A		noncoding	165	0.533	Step 1
12	2:21230328	APOB	NM_000384.3	c.9412C>G	p.(Pro3138Ala)	missense	242	0.516	Step 1
12	1:47726103	STIL	NM_001048166.1	c.2938A>G	p.(Thr980Ala)	missense	263	0.467	Step 1
12	1:16262631	SPEN	NM_015001.3	c.9896G>C	p.(Ser3299Thr)	missense	285	0.547	Step 1
12	1:16259481	SPEN	NM_015001.3	c.6746C>T	p.(Pro2249Leu)	missense	200	0.44	Step 1
12	17:72862941	FDXR	NM_024417.5	c.235C>T	p.(Arg79Cys)	missense	235	0.429	Step 1
12	16:90102789	GAS8	NM_001481.3	c.551A>C	p.(Glu184Ala)	missense	103	0.436	Step 1
12	15:45398798	DUOX2	NM_001363711.2	c.1873C>T	p.(Arg625Ter)	nonsense	243	0.485	Step 1
12	10:102781694	PDZD7	NM_001195263.2	c.728A>G	p.(His243Arg)	missense	228	0.486	Step 1
12	10:73574842	CDH23	NM_022124.6	c.9872C>T	p.(Thr3291Met)	missense	154	0.512	Step 1
12	10:73501619	CDH23	NM_022124.6	c.4786C>T	p.(Arg1596Cys)	missense	134	0.447	Step 1
12	5:149927930	NDST1	NM_001543.5	c.2296A>G	p.(Ser766Gly)	missense	157	0.496	Step 1
12	4:166935679	TLL1	NM_012464.5	c.1009A>G	p.(Ile337Val)	missense	135	0.548	Step 1
12	4:155527787	FGG	NM_021870.3	c.1129+66_1129+69del		noncoding	40	0.525	Step 1
12	6:51913301	PKHD1	NM_138694.4	c.2396C>G	p.(Thr799Arg)	missense	159	0.44	Step 1
12	2:219757968	WNT10A	NM_025216.3	c.1229C>A	p.(Thr410Asn)	missense	205	0.478	Step 1
12	1:40434288	MFSD2A	NM_032793.5	c.1400A>G	p.(Lys467Arg)	missense	136	0.522	Step 1
12	1:8390704	SLC45A1	NM_001080397.3	c.1151G>A	p.(Gly384Asp)	missense	256	0.488	Step 1
12	8:100844693	VPS13B	NM_152564.5	c.9427C>T	p.(Pro3143Ser)	missense	93	0.451	Step 1
12	19:34887530	GPI	NM_000175.5	c.1237C>T	p.(Gln413Ter)	nonsense	104	0.384	Step 1
12	19:17927687	INSL3	NM_005543.4	c.372C>G	p.(Asp124Glu)	missense	187	0.433	Step 1
12	19:17305559	MYO9B	NM_004145.4	c.3323G>A	p.(Arg1108Lys)	missense	256	0.484	Step 1
12	20:5939379	MCM8	NM_032485.6	c.789+7C>T		noncoding	65	0.646	Step 1
12	22:51064669	ARSA	NM_000487.6	c.892G>A	p.(Gly298Ser)	missense	184	0.489	Step 1
12	16:21210972	ZP2	NM_001376232.1	c.1846A>T	p.(Ser616Cys)	missense	80	0.275	Step 1
12	22:38142319	TRIOBP	NM_001039141.3	c.5322+5298_5322+5303dup		noncoding	24	0.45	Step 1
12	19:49100068	SULT2B1	NM_177973.2	c.718G>A	p.(Val240Ile)	missense	180	0.438	Step 1
12	17:79826386	ARHGDIA	NM_004309.6	c.*366G>A		UTR	390	0.476	Step 1
12	17:78319385	RNF213	NM_001256071.3	c.7250T>G	p.(Ile2417Ser)	missense	262	0.511	Step 1
12	12:124366269	DNAH10	NM_001372106.1	c.8732G>A	p.(Arg2911His)	missense	139	0.482	Step 1
12	21:19666690	TMPRSS15	NM_002772.3	c.2383G>A	p.(Ala795Thr)	missense	157	0.414	Step 1
12	21:19642290	TMPRSS15	NM_002772.3	c.3056A>G	p.(His1019Arg)	missense	76	0.486	Step 1
12	17:4858490	ENO3	NM_053013.4	c.565T>C	p.(Tyr189His)	missense	178	0.477	Step 1
12	16:1203714	CACNA1H	NM_021098.3	c.-18-6C>G		noncoding	138	0.384	Step 1
12	20:33530399	GSS	NM_000178.4	c.383A>G	p.(Tyr128Cys)	missense	187	0.486	Step 1
12	11:34475476	CAT	NM_001752.4	c.711+3A>G		noncoding	139	0.503	Step 1
12	11:118529147	TREH	NM_007180.3	c.1603G>A	p.(Gly535Arg)	missense	149	0.516	Step 1
12	9:104192047	ALDOB	NM_000035.4	c.314T>G	p.(Val105Gly)	missense	212	0.533	Step 1
12	11:66460132	SPTBN2	NM_006946.4	c.5065C>T	p.(Arg1689Cys)	missense	139	0.496	Step 1
12	7:8095102	GLCCI1	NM_138426.4	c.736C>G	p.(Gln246Glu)	missense	161	0.478	Step 1
12	5:150931066	FAT2	NM_001447.3	c.4258G>A	p.(Val1420Ile)	missense	140	0.528	Step 1
12	5:41840616	OXCT1	NM_000436.4	c.672-3T>C		noncoding	88	0.568	Step 1
12	2:233712226	GIGYF2	NM_001103146.3	c.3630_3635del	p.(Gln1215_Gln1216del)	inframe	182	0.5	Step 1
12	3:47037869	NBEAL2	NM_015175.3	c.2260C>T	p.(Leu754Phe)	missense	297	0.511	Step 1
12	2:224640670	AP1S3	NM_001039569.2	c.239C>T	p.(Thr80Met)	missense	75	0.493	Step 1
12	3:9908888	CIDEC	NM_001321142.2	c.647C>T	p.(Thr216Met)	missense	120	0.475	Step 1
12	2:219692747	PRKAG3	NM_017431.4	c.754C>T	p.(Arg252Cys)	missense	115	0.521	Step 1
12	1:235914612	LYST	NM_000081.4	c.7678A>G	p.(Ile2560Val)	missense	128	0.414	Step 1
12	1:94481287	ABCA4	NM_000350.3	c.5312+8G>A		noncoding	133	0.488	Step 1
12	1:91405998	ZNF644	NM_201269.3	c.913G>A	p.(Glu305Lys)	missense	149	0.436	Step 1
12	2:30143140	ALK	NM_004304.5	c.386G>T	p.(Gly129Val)	missense	272	0.507	Step 1
12	1:237870354	RYR2	NM_001035.3	c.9686C>T	p.(Thr3229Ile)	missense	183	0.53	Step 1
12	X:50350994	SHROOM4	NM_020717.5	c.3148C>A	p.(Pro1050Thr)	missense	277	0.498	Step 1
12	16:29816463	KIF22	NM_007317.3	c.1918A>T	p.(Ile640Leu)	missense	286	0.503	Step 1
12	4:85710917	WDFY3	NM_014991.6	c.3631G>A	p.(Ala1211Thr)	missense	72	0.402	Step 1
12	1:150526221	ADAMTSL4	NM_019032.6	c.754C>A	p.(His252Asn)	missense	206	0.475	Step 1
12	1:243493966	SDCCAG8	NM_006642.5	c.1193C>T	p.(Thr398Met)	missense	58	0.465	Step 1
12	18:29125819	DSG2	NM_001943.5	c.2470C>T	p.(Arg824Cys)	missense	160	0.5	Step 1
12	19:2249407	AMH	NM_000479.5	c.76A>G	p.(Arg26Gly)	missense	176	0.568	Step 1
12	8:38871555	ADAM9	NM_003816.3	c.326A>G	p.(Asn109Ser)	missense	79	0.569	Step 1
12	5:132200108	GDF9	NM_005260.7	c.118T>G	p.(Leu40Val)	missense	152	0.388	Step 1
12	2:239160390	PER2	NM_022817.3	c.3124T>G	p.(Ser1042Ala)	missense	89	0.483	Step 1
12	1:153233748	LORICRIN	NM_000427.3	c.323G>C	p.(Gly108Ala)	missense	462	0.614	Step 1
12	1:152081767	TCHH	NM_007113.4	c.3926G>A	p.(Arg1309Lys)	missense	526	0.5	Step 1
13	15:100871115	ADAMTS17	NM_139057.4	c.588_594del	p.(Arg196SerfsTer7)	frameshift	320	0.41	Step 1 and 2
13	21:47776997	PCNT	NM_006031.6	c.2045C>T	p.(Ser682Leu)	missense	313	0.488	Step 1 and 2
13	4:128621168	INTU	NM_015693.4	c.1453G>A	p.(Glu485Lys)	missense	103	0.533	Step 1 and 2
13	4:1806119	FGFR3	NM_000142.5	c.1138G>A	p.(Gly380Arg)	missense	627	0.481	Step 1,2 and 3
13	11:71943789	INPPL1	NM_001567.4	c.1832G>A	p.(Arg611His)	missense	378	0.507	Step 1
13	16:3639161	SLX4	NM_032444.4	c.4478C>T	p.(Ser1493Leu)	missense	606	0.468	Step 1
13	1:235564898	TBCE	NM_003193.5	c.181T>A	p.(Cys61Ser)	missense	162	0.487	Step 1
13	12:133245032	POLE	NM_006231.4	c.2083T>G	p.(Phe695Val)	missense	372	0.532	Step 1
13	21:47552210	COL6A2	NM_001849.4	c.2804G>A	p.(Gly935Glu)	missense	510	0.466	Step 1
13	22:50893165	SBF1	NM_002972.4	c.4819C>T	p.(Arg1607Trp)	missense	347	0.423	Step 1
13	22:43026884	CYB5R3	NM_000398.7	c.333+2_333+3dup		noncoding	211	0.449	Step 1
13	16:31475981	ARMC5	NM_001105247.2	c.1637C>T	p.(Pro546Leu)	missense	575	0.453	Step 1
13	13:36878734	SPART	NM_015087.5	c.1769C>T	p.(Ala590Val)	missense	367	0.49	Step 1
13	17:44060287	MAPT	NM_001377265.1	c.342T>G	p.(Asn114Lys)	missense	32	0.25	Step 1
13	13:24411822	MIPEP	NM_005932.4	c.1412T>C	p.(Met471Thr)	missense	232	0.461	Step 1
13	17:10304713	MYH8	NM_002472.3	c.2987C>G	p.(Ser996Cys)	missense	801	0.511	Step 1
13	17:7754641	KDM6B	NM_001348716.2	c.3880-7T>C		noncoding	238	0.563	Step 1
13	15:49030822	CEP152	NM_001194998.2	c.4757G>C	p.(Arg1586Pro)	missense	533	0.497	Step 1
13	14:102506685	DYNC1H1	NM_001376.5	c.11803G>A	p.(Val3935Met)	missense	613	0.504	Step 1
13	11:1281259	MUC5B	NM_002458.3	c.16867G>A	p.(Gly5623Arg)	missense	287	0.48	Step 1
13	9:32984659	APTX	NM_001195248.2	c.740G>A	p.(Arg247Gln)	missense	403	0.523	Step 1
13	9:3856177	GLIS3	NM_001042413.2	c.2305C>A	p.(Pro769Thr)	missense	261	0.536	Step 1
13	12:7045891	ATN1	NM_001940.4	c.1488_1508dup	p.(Gln496_Gln502dup)	inframe	254	0.452	Step 1
13	11:63988025	FERMT3	NM_031471.6	c.1429C>T	p.(Arg477Cys)	missense	300	0.526	Step 1
13	8:92083459	OTUD6B	NM_016023.5	c.176T>C	p.(Met59Thr)	missense	164	0.475	Step 1
13	9:123201885	CDK5RAP2	NM_018249.6	c.3514T>C	p.(Ser1172Pro)	missense	629	0.492	Step 1
13	9:137714841	COL5A1	NM_000093.5	c.4609-3C>T		noncoding	269	0.479	Step 1
13	4:94128597	GRID2	NM_001510.4	c.778A>G	p.(Ile260Val)	missense	311	0.533	Step 1
13	5:71493033	MAP1B	NM_005909.5	c.3851A>G	p.(Asn1284Ser)	missense	421	0.494	Step 1
13	4:3076603	HTT	NM_001388492.1	c.87_110del	p.(Gln31_Gln38del)	inframe	28	0.571	Step 1
13	3:47161730	SETD2	NM_014159.7	c.4396C>G	p.(Gln1466Glu)	missense	409	0.484	Step 1
13	2:179476777	TTN	NM_001267550.2	c.50354+7T>C		noncoding	382	0.481	Step 1
13	2:179476314	TTN	NM_001267550.2	c.50642G>C	p.(Gly16881Ala)	missense	459	0.538	Step 1
13	2:179437291	TTN	NM_001267550.2	c.73568C>A	p.(Pro24523Gln)	missense	794	0.526	Step 1
13	2:161052880	ITGB6	NM_000888.5	c.193C>T	p.(Leu65Phe)	missense	412	0.495	Step 1
13	1:197102660	ASPM	NM_018136.5	c.2239A>G	p.(Thr747Ala)	missense	307	0.465	Step 1
13	3:87309260	POU1F1	NM_000306.4	c.666-6C>T		noncoding	346	0.479	Step 1
13	1:12056379	MFN2	NM_014874.4	c.474+4A>G		noncoding	179	0.446	Step 1
13	19:1621924	TCF3	NM_003200.5	c.868G>A	p.(Ala290Thr)	missense	198	0.525	Step 1
13	16:15844174	MYH11	NM_002474.3	c.1879G>A	p.(Gly627Ser)	missense	342	0.473	Step 1
13	16:15865545	MYH11	NM_002474.3	c.914A>G	p.(Asn305Ser)	missense	252	0.468	Step 1
13	11:31811460	PAX6	NM_001368894.2	c.*18_*21del		UTR	21	0.461	Step 1
13	12:21015421	SLCO1B3	NM_019844.4	c.557C>A	p.(Thr186Asn)	missense	277	0.527	Step 1
13	10:89621806	KLLN	NM_001126049.2	c.438del	p.(Ala147ProfsTer35)	frameshift	613	0.482	Step 1
13	2:202050562	CASP10	NM_032977.4	c.62G>C	p.(Arg21Pro)	missense	249	0.497	Step 1
13	2:47136319	MCFD2	NM_139279.6	c.-6-3C>G		noncoding	177	0.497	Step 1
13	1:216419934	USH2A	NM_206933.4	c.2802T>G	p.(Cys934Trp)	missense	392	0.484	Step 1
13	1:29359617	EPB41	NM_001376013.1	c.1225G>A	p.(Val409Ile)	missense	334	0.47	Step 1
13	18:72344501	ZNF407	NM_017757.3	c.1526C>T	p.(Pro509Leu)	missense	298	0.426	Step 1
13	13:32907270	BRCA2	NM_000059.4	c.1655C>A	p.(Ser552Tyr)	missense	333	0.468	Step 1
13	21:43810048	TMPRSS3	NM_001256317.3	c.193A>G	p.(Ile65Val)	missense	95	0.6	Step 1
13	21:34660525	IL10RB	NM_000628.5	c.763G>A	p.(Ala255Thr)	missense	357	0.473	Step 1
13	21:19726136	TMPRSS15	NM_002772.3	c.925A>G	p.(Asn309Asp)	missense	144	0.534	Step 1
13	20:32856839	ASIP	NM_001672.3	c.265C>A	p.(Leu89Ile)	missense	235	0.506	Step 1
13	17:78176161	CARD14	NM_001366385.1	c.2161G>A	p.(Val721Met)	missense	257	0.463	Step 1
13	17:74536600	PRCD	NM_001077620.3	c.88G>A	p.(Val30Met)	missense	187	0.379	Step 1
13	22:37906426	CARD10	NM_014550.4	c.702G>A	p.(Val234=)	synonymous	132	0.5	Step 1
13	17:73836605	UNC13D	NM_199242.3	c.736G>A	p.(Val246Met)	missense	411	0.51	Step 1
13	18:33780001	MOCOS	NM_017947.4	c.655G>A	p.(Val219Ile)	missense	519	0.479	Step 1
13	19:13210389	LYL1	NM_005583.5	c.587T>A	p.(Met196Lys)	missense	380	0.492	Step 1
13	16:20793084	ACSM3	NM_005622.4	c.994A>G	p.(Met332Val)	missense	178	0.449	Step 1
13	16:2481193	CCNF	NM_001761.3	c.79C>T	p.(Pro27Ser)	missense	300	0.483	Step 1
13	16:87723887	JPH3	NM_020655.4	c.1921G>T	p.(Asp641Tyr)	missense	325	0.501	Step 1
13	16:84066999	SLC38A8	NM_001080442.3	c.464T>C	p.(Leu155Pro)	missense	262	0.438	Step 1
13	15:68510953	CLN6	NM_017882.3	c.119C>A	p.(Thr40Lys)	missense	116	0.465	Step 1
13	15:65491077	CILP	NM_003613.4	c.1547G>A	p.(Arg516His)	missense	567	0.507	Step 1
13	16:55736257	SLC6A2	NM_001172501.3	c.1853G>A	p.(Ter618=)	stop_retained	212	0.476	Step 1
13	13:110436296	IRS2	NM_003749.3	c.2096_2104del	p.(Ala699_Ala701del)	inframe	341	0.502	Step 1
13	13:103718236	SLC10A2	NM_000452.3	c.364G>A	p.(Asp122Asn)	missense	265	0.486	Step 1
13	9:6645487	GLDC	NM_000170.3	c.13G>C	p.(Ala5Pro)	missense	165	0.484	Step 1
13	11:96074569	MAML2	NM_032427.4	c.491A>G	p.(Gln164Arg)	missense	730	0.493	Step 1
13	12:26564324	ITPR2	NM_002223.4	c.7328T>C	p.(Met2443Thr)	missense	185	0.513	Step 1
13	6:148865163	SASH1	NM_015278.5	c.2557G>A	p.(Val853Met)	missense	546	0.496	Step 1
13	11:47354493	MYBPC3	NM_000256.3	c.3362G>A	p.(Arg1121His)	missense	273	0.492	Step 1
13	8:37823185	ADRB3	NM_000025.3	c.803C>T	p.(Pro268Leu)	missense	328	0.512	Step 1
13	4:183673042	TENM3	NM_001080477.4	c.3719G>A	p.(Arg1240His)	missense	319	0.514	Step 1
13	9:77397678	TRPM6	NM_017662.5	c.3011C>A	p.(Pro1004Gln)	missense	287	0.519	Step 1
13	7:143029550	CLCN1	NM_000083.3	c.1205C>T	p.(Ala402Val)	missense	577	0.461	Step 1
13	7:142651320	KEL	NM_000420.3	c.875G>A	p.(Arg292Gln)	missense	280	0.492	Step 1
13	9:135947060	CEL	NM_001807.6	c.2172del	p.(Val725CysfsTer33)	frameshift	636	0.408	Step 1
13	4:122854138	TRPC3	NM_001130698.2	c.275G>T	p.(Arg92Leu)	missense	357	0.49	Step 1
13	7:87810881	ADAM22	NM_001324418.2	c.2557A>T	p.(Ile853Phe)	missense	131	0.496	Step 1
13	3:195798911	TFRC	NM_001128148.3	c.547C>T	p.(Arg183Cys)	missense	209	0.502	Step 1
13	3:38950586	SCN11A	NM_001349253.2	c.1201A>G	p.(Met401Val)	missense	408	0.458	Step 1
13	2:220144520	DNAJB2	NM_006736.6	c.-36C>T		UTR	124	0.508	Step 1
13	1:201282462	PKP1	NM_001005337.3	c.475C>A	p.(Leu159Ile)	missense	363	0.479	Step 1
13	2:31591489	XDH	NM_000379.4	c.2018C>T	p.(Ala673Val)	missense	328	0.509	Step 1
13	22:24761478	SPECC1L	NM_015330.6	c.2862C>A	p.(Asp954Glu)	missense	286	0.472	Step 1
13	19:5893104	NDUFA11	NM_001193375.3	c.511G>C	p.(Gly171Arg)	missense	367	0.487	Step 1
13	16:53671711	RPGRIP1L	NM_015272.5	c.3116A>G	p.(Gln1039Arg)	missense	363	0.465	Step 1
13	9:71661314	FXN	NM_000144.5	c.179G>A	p.(Arg60His)	missense	220	0.454	Step 1
13	9:138587028	SOHLH1	NM_001101677.2	c.743C>T	p.(Ser248Leu)	missense	167	0.425	Step 1
13	7:2627489	IQCE	NM_152558.5	c.1022G>A	p.(Arg341Lys)	missense	142	0.535	Step 1
13	4:88537475	DSPP	NM_014208.3	c.3661G>A	p.(Asp1221Asn)	missense	184	0.532	Step 1
13	19:51413984	KLK4	NM_004917.5	c.11C>G	p.(Ala4Gly)	missense	168	0.488	Step 1
13	1:167825580	ADCY10	NM_018417.6	c.1994C>T	p.(Pro665Leu)	missense	211	0.469	Step 1
13	18:23866137	TAF4B	NM_005640.3	c.1264G>A	p.(Gly422Arg)	missense	465	0.468	Step 1
13	16:2167878	PKD1	NM_001009944.3	c.1115G>A	p.(Ser372Asn)	missense	130	0.507	Step 1
13	15:90210318	PLIN1	NM_002666.5	c.1058C>T	p.(Ala353Val)	missense	419	0.479	Step 1
13	11:67290766	CABP2	NM_016366.3	c.32G>A	p.(Arg11Gln)	missense	154	0.413	Step 1
13	5:96100929	CAST	NM_001750.7	c.1937G>A	p.(Ser646Asn)	missense	84	0.535	Step 1
13	3:38833581	SCN10A	NM_006514.4	c.349A>C	p.(Asn117His)	missense	163	0.46	Step 1
14	15:48717589	FBN1	NM_000138.5	c.7430A>G	p.(Gln2477Arg)	missense	163	0.527	Step 1 and 2
14	16:68373385	PRMT7	NM_019023.5	c.665C>T	p.(Ala222Val)	missense	195	0.487	Step 1 and 2
14	6:43008414	CUL7	NM_014780.5	c.3877G>A	p.(Gly1293Ser)	missense	134	0.514	Step 1 and 2
14	4:1806119	FGFR3	NM_000142.5	c.1138G>A	p.(Gly380Arg)	missense	50	0.54	Step 1,2 and 3
14	11:71949312	INPPL1	NM_001567.4	c.3692T>C	p.(Ile1231Thr)	missense	23	0.347	Step 1
14	3:142285065	ATR	NM_001184.4	c.190A>G	p.(Thr64Ala)	missense	72	0.416	Step 1
14	X:153587763	FLNA	NM_001110556.2	c.4154C>T	p.(Thr1385Met)	missense	21	0.428	Step 1
14	4:126242070	FAT4	NM_001291303.3	c.4504G>A	p.(Ala1502Thr)	missense	129	0.426	Step 1
14	11:46920578	LRP4	NM_002334.4	c.553G>A	p.(Ala185Thr)	missense	29	0.586	Step 1
14	17:48276622	COL1A1	NM_000088.4	c.436C>A	p.(Pro146Thr)	missense	47	0.446	Step 1
14	2:15427240	NBAS	NM_015909.4	c.5095G>A	p.(Glu1699Lys)	missense	94	0.531	Step 1
14	1:120283140	PHGDH	NM_006623.4	c.1077G>A	p.(Gln359=)	synonymous	52	0.442	Step 1
14	1:12049222	MFN2	NM_014874.4	c.-4C>T		UTR	72	0.527	Step 1
14	1:27101719	ARID1A	NM_006015.6	c.4993+8G>A		noncoding	128	0.453	Step 1
14	2:152342318	NEB	NM_001164508.2	c.25534G>A	p.(Gly8512Ser)	missense	125	0.472	Step 1
14	2:179495039	TTN	NM_001267550.2	c.44210G>T	p.(Arg14737Leu)	missense	155	0.445	Step 1
14	3:193336666	OPA1	NM_130837.3	c.619G>A	p.(Glu207Lys)	missense	81	0.543	Step 1
14	6:31238194	HLA-C	NM_002117.6	c.688C>A	p.(Leu230Met)	missense	25	0.52	Step 1
14	6:32063729	TNXB	NM_001365276.2	c.1901G>A	p.(Gly634Glu)	missense	263	0.532	Step 1
14	8:62557195	ASPH	NM_004318.4	c.620-5dup		noncoding	42	0.3	Step 1
14	6:152770673	SYNE1	NM_182961.4	c.3499G>A	p.(Val1167Ile)	missense	124	0.483	Step 1
14	8:145024784	PLEC	NM_201378.4	c.71-11924C>T		noncoding	15	0.533	Step 1
14	11:4076824	STIM1	NM_001382567.1	c.454G>A	p.(Glu152Lys)	missense	96	0.52	Step 1
14	7:2646945	IQCE	NM_152558.5	c.1969+84C>T		noncoding	45	0.444	Step 1
14	7:40133747	CDK13	NM_003718.5	c.3707A>G	p.(Gln1236Arg)	missense	169	0.473	Step 1
14	7:98564725	TRRAP	NM_001375524.1	c.7238G>A	p.(Arg2413His)	missense	52	0.307	Step 1
14	11:73795997	C2CD3	NM_001286577.2	c.3929T>C	p.(Ile1310Thr)	missense	82	0.524	Step 1
14	7:106888896	COG5	NM_006348.5	c.1798G>A	p.(Val600Met)	missense	101	0.455	Step 1
14	13:52548160	ATP7B	NM_000053.4	c.1196C>A	p.(Ala399Glu)	missense	141	0.51	Step 1
14	14:23884292	MYH7	NM_000257.4	c.5471A>G	p.(Asn1824Ser)	missense	302	0.519	Step 1
14	14:23884293	MYH7	NM_000257.4	c.5470A>G	p.(Asn1824Asp)	missense	302	0.516	Step 1
14	8:48826454	PRKDC	NM_006904.7	c.2781+6del		noncoding	82	0.597	Step 1
14	17:1401343	INPP5K	NM_016532.4	c.850G>A	p.(Asp284Asn)	missense	72	0.458	Step 1
14	12:7169853	C1S	NM_001734.5	c.80A>G	p.(Asn27Ser)	missense	150	0.513	Step 1
14	11:1268351	MUC5B	NM_002458.3	c.10241C>A	p.(Pro3414His)	missense	184	0.385	Step 1
14	15:28447308	HERC2	NM_004667.6	c.7568A>G	p.(Tyr2523Cys)	missense	108	0.342	Step 1
14	12:69090610	NUP107	NM_020401.4	c.460A>G	p.(Met154Val)	missense	81	0.358	Step 1
14	15:40915035	KNL1	NM_144508.5	c.2573T>C	p.(Ile858Thr)	missense	113	0.407	Step 1
14	15:54007541	WDR72	NM_182758.4	c.363G>A	p.(Met121Ile)	missense	69	0.492	Step 1
14	15:72190531	MYO9A	NM_006901.4	c.4313G>A	p.(Ser1438Asn)	missense	344	0.511	Step 1
14	17:40838952	CNTNAP1	NM_003632.3	c.932G>A	p.(Arg311Gln)	missense	58	0.482	Step 1
14	15:82520661	EFL1	NM_024580.6	c.940G>T	p.(Asp314Tyr)	missense	232	0.495	Step 1
14	17:48245758	SGCA	NM_000023.4	c.409G>C	p.(Glu137Gln)	missense	99	0.515	Step 1
14	20:47606201	ARFGEF2	NM_006420.3	c.2794G>A	p.(Ala932Thr)	missense	88	0.568	Step 1
14	21:46895396	COL18A1	NM_001379500.1	c.745G>A	p.(Gly249Arg)	missense	43	0.465	Step 1
14	18:10704549	PIEZO2	NM_001378183.1	c.6101G>A	p.(Arg2034His)	missense	221	0.529	Step 1
14	18:43446863	EPG5	NM_020964.3	c.6521C>T	p.(Pro2174Leu)	missense	129	0.496	Step 1
14	19:3118927	GNA11	NM_002067.5	c.611T>G	p.(Val204Gly)	missense	33	0.424	Step 1
14	19:13215846	TRMT1	NM_001136035.4	c.1883C>T	p.(Thr628Ile)	missense	83	0.506	Step 1
14	X:70519874	NONO	NM_007363.5	c.1364A>G	p.(Asn455Ser)	missense	157	0.592	Step 1
14	22:24108439	CHCHD10	NM_213720.3	c.285G>C	p.(Gln95His)	missense	15	0.466	Step 1
14	1:3751560	CEP104	NM_014704.4	c.1414G>A	p.(Glu472Lys)	missense	143	0.356	Step 1
14	1:240371573	FMN2	NM_020066.5	c.3461C>T	p.(Pro1154Leu)	missense	41	0.317	Step 1
14	1:92944314	GFI1	NM_005263.5	c.925-8_925-5del		noncoding	69	0.7	Step 1
14	2:1499775	TPO	NM_001206744.2	c.2021A>G	p.(Asn674Ser)	missense	63	0.428	Step 1
14	2:48033998	MSH6	NM_000179.3	c.*4_*7dup		stop_retained	159	0.484	Step 1
14	1:216052322	USH2A	NM_206933.4	c.8342C>T	p.(Thr2781Ile)	missense	194	0.422	Step 1
14	3:49160692	LAMB2	NM_002292.4	c.4097A>G	p.(His1366Arg)	missense	79	0.544	Step 1
14	6:99894012	USP45	NM_001346022.3	c.1636A>T	p.(Lys546Ter)	nonsense	224	0.477	Step 1
14	3:123356997	MYLK	NM_053025.4	c.4882G>A	p.(Val1628Met)	missense	61	0.459	Step 1
14	4:166946460	TLL1	NM_012464.5	c.1043-8C>T		noncoding	138	0.391	Step 1
14	8:77763452	ZFHX4	NM_024721.5	c.4295G>A	p.(Arg1432His)	missense	404	0.43	Step 1
14	9:117188522	WHRN	NM_015404.4	c.1135C>T	p.(Arg379Trp)	missense	202	0.4	Step 1
14	7:128588387	IRF5	NM_001098629.3	c.1299+5A>G		noncoding	109	0.467	Step 1
14	14:51387748	PYGL	NM_002863.5	c.698G>A	p.(Gly233Asp)	missense	90	0.555	Step 1
14	14:65253667	SPTB	NM_001355436.2	c.3016G>A	p.(Ala1006Thr)	missense	127	0.527	Step 1
14	15:28230211	OCA2	NM_000275.3	c.1363A>G	p.(Arg455Gly)	missense	103	0.446	Step 1
14	17:9124480	NTN1	NM_004822.3	c.1412-5T>A		noncoding	24	0.391	Step 1
14	12:56397612	SUOX	NM_001032386.2	c.439C>T	p.(His147Tyr)	missense	155	0.548	Step 1
14	15:89864088	POLG	NM_002693.3	c.2890C>T	p.(Arg964Cys)	missense	104	0.5	Step 1
14	15:89864094	POLG	NM_002693.3	c.2884G>A	p.(Ala962Thr)	missense	107	0.495	Step 1
14	16:2009662	NDUFB10	NM_004548.3	c.37C>T	p.(Pro13Ser)	missense	36	0.611	Step 1
14	13:28494372	PDX1	NM_000209.4	c.97C>G	p.(Pro33Ala)	missense	97	0.443	Step 1
14	22:19950045	COMT	NM_000754.4	c.1-5T>A		noncoding	24	0.416	Step 1
14	3:123022987	ADCY5	NM_183357.3	c.2486G>A	p.(Arg829Gln)	missense	61	0.377	Step 1
14	6:25850094	SLC17A3	NM_001098486.2	c.1210T>A	p.(Cys404Ser)	missense	114	0.491	Step 1
14	19:42729112	ZNF526	NM_133444.3	c.557C>G	p.(Pro186Arg)	missense	279	0.501	Step 1
14	16:89816196	FANCA	NM_000135.4	c.3181A>G	p.(Ser1061Gly)	missense	137	0.503	Step 1
14	1:11087276	MASP2	NM_006610.4	c.1727C>T	p.(Thr576Ile)	missense	308	0.522	Step 1
14	1:11106942	MASP2	NM_006610.4	c.234+6G>A		noncoding	40	0.475	Step 1
14	1:46871087	FAAH	NM_001441.3	c.488C>T	p.(Pro163Leu)	missense	33	0.484	Step 1
14	1:78392121	NEXN	NM_144573.4	c.512T>C	p.(Ile171Thr)	missense	71	0.422	Step 1
14	2:26739418	OTOF	NM_194248.3	c.377G>A	p.(Gly126Asp)	missense	64	0.515	Step 1
14	3:185390343	IGF2BP2	NM_006548.6	c.1186T>A	p.(Tyr396Asn)	missense	94	0.255	Step 1
14	4:47597899	CORIN	NM_006587.4	c.2967dup	p.(Val990CysfsTer3)	frameshift	215	0.553	Step 1
14	4:47682239	CORIN	NM_006587.4	c.1051G>T	p.(Gly351Trp)	missense	139	0.467	Step 1
14	2:190922176	MSTN	NM_005259.3	c.936G>C	p.(Glu312Asp)	missense	163	0.496	Step 1
14	2:233612356	GIGYF2	NM_001103146.3	c.73A>G	p.(Thr25Ala)	missense	158	0.518	Step 1
14	6:42906516	CNPY3	NM_006586.5	c.824C>T	p.(Pro275Leu)	missense	506	0.482	Step 1
14	4:144336627	GAB1	NM_002039.4	c.73-3T>C		noncoding	166	0.415	Step 1
14	8:95653611	ESRP1	NM_017697.4	c.65A>C	p.(Lys22Thr)	missense	112	0.517	Step 1
14	5:156899335	NIPAL4	NM_001099287.2	c.587-5C>A		noncoding	145	0.462	Step 1
14	5:33989503	AMACR	NM_014324.6	c.844G>C	p.(Glu282Gln)	missense	208	0.49	Step 1
14	6:24178718	DCDC2	NM_016356.5	c.1166A>G	p.(Glu389Gly)	missense	226	0.477	Step 1
14	11:10500225	AMPD3	NM_001025389.2	c.374A>G	p.(Tyr125Cys)	missense	193	0.569	Step 1
14	7:91690697	AKAP9	NM_005751.5	c.5725G>A	p.(Ala1909Thr)	missense	98	0.489	Step 1
14	11:73686543	UCP2	NM_003355.3	c.808T>C	p.(Tyr270His)	missense	129	0.558	Step 1
14	7:150884602	ASB10	NM_080871.4	c.208A>G	p.(Ser70Gly)	missense	100	0.45	Step 1
14	8:1719584	CLN8	NM_018941.4	c.364C>T	p.(His122Tyr)	missense	120	0.441	Step 1
14	8:21986548	HR	NM_005144.5	c.136C>A	p.(Pro46Thr)	missense	45	0.444	Step 1
14	10:21957848	MLLT10	NM_001195626.3	c.796-1530C>T		noncoding	80	0.612	Step 1
14	10:82036188	MAT1A	NM_000429.3	c.712G>A	p.(Glu238Lys)	missense	78	0.474	Step 1
14	10:27324590	ANKRD26	NM_014915.3	c.2789C>A	p.(Thr930Lys)	missense	192	0.432	Step 1
14	10:100185437	HPS1	NM_000195.5	c.1196T>C	p.(Met399Thr)	missense	61	0.573	Step 1
14	10:100189568	HPS1	NM_000195.5	c.847G>C	p.(Gly283Arg)	missense	56	0.428	Step 1
14	10:72358251	PRF1	NM_001083116.3	c.1226C>T	p.(Pro409Leu)	missense	184	0.505	Step 1
14	14:96949428	AK7	NM_152327.5	c.1846G>A	p.(Glu616Lys)	missense	231	0.519	Step 1
14	12:1949940	CACNA2D4	NM_172364.5	c.2516C>T	p.(Ala839Val)	missense	21	0.476	Step 1
14	12:4763993	NDUFA9	NM_005002.5	c.223C>T	p.(Arg75Cys)	missense	110	0.445	Step 1
14	17:32965190	TMEM132E	NM_001304438.2	c.3164C>G	p.(Thr1055Arg)	missense	68	0.397	Step 1
14	16:1268541	CACNA1H	NM_021098.3	c.5777C>T	p.(Ser1926Leu)	missense	15	0.6	Step 1
14	16:10637441	EMP2	NM_001424.6	c.155A>G	p.(Asn52Ser)	missense	94	0.553	Step 1
14	18:61471522	SERPINB7	NM_003784.4	c.796C>T	p.(Arg266Ter)	nonsense	149	0.51	Step 1
14	17:78182047	CARD14	NM_001366385.1	c.2918A>G	p.(Asp973Gly)	missense	28	0.464	Step 1
14	19:7810523	CD209	NM_021155.4	c.629C>T	p.(Ser210Phe)	missense	263	0.403	Step 1
14	22:26868809	HPS4	NM_022081.6	c.373C>G	p.(Leu125Val)	missense	48	0.437	Step 1
14	19:17945798	JAK3	NM_000215.4	c.2062A>T	p.(Ile688Phe)	missense	125	0.464	Step 1
14	7:117243612	CFTR	NM_000492.4	c.2684G>A	p.(Ser895Asn)	missense	200	0.46	Step 1
14	6:43623417	RSPH9	NM_152732.5	c.512G>A	p.(Arg171Gln)	missense	158	0.512	Step 1
14	17:39723803	KRT9	NM_000226.4	c.1594G>A	p.(Gly532Ser)	missense	1933	0.471	Step 1
14	1:152282495	FLG	NM_002016.2	c.4867C>T	p.(Arg1623Trp)	missense	140	0.521	Step 1
14	2:209007544	CRYGB	NM_005210.4	c.346C>T	p.(Arg116Cys)	missense	203	0.492	Step 1
14	19:46273846	DMPK	NM_004409.5	c.1790T>A	p.(Val597Asp)	missense	43	0.348	Step 1
14	18:6959475	LAMA1	NM_005559.4	c.7643T>A	p.(Met2548Lys)	missense	89	0.449	Step 1
14	19:38573640	SIPA1L3	NM_015073.3	c.1435C>T	p.(Pro479Ser)	missense	128	0.414	Step 1
15	4:1803568	FGFR3	NM_000142.5	c.746C>G	p.(Ser249Cys)	missense	222	0.504	Step 1,2 and 3
15	3:58087993	FLNB	NM_001457.4	c.1409G>T	p.(Arg470Leu)	missense	247	0.534	Step 1 and 2
15	3:159986269	IFT80	NM_020800.3	c.2155C>T	p.(Arg719Cys)	missense	201	0.472	Step 1 and 2
15	15:89415231	ACAN	NM_001369268.1	c.7220-3C>A		noncoding	138	0.42	Step 1 and 2
15	1:98293683	DPYD	NM_000110.4	c.220C>T	p.(Arg74Ter)	nonsense	191	0.445	Step 1
15	16:3642792	SLX4	NM_032444.4	c.2235C>T	p.(Thr745=)	synonymous	195	0.492	Step 1
15	12:20774336	PDE3A	NM_000921.5	c.1531A>G	p.(Ser511Gly)	missense	217	0.474	Step 1
15	22:39621844	PDGFB	NM_002608.4	c.610C>A	p.(Pro204Thr)	missense	217	0.506	Step 1
15	21:47401849	COL6A1	NM_001848.3	c.85G>A	p.(Val29Met)	missense	112	0.482	Step 1
15	21:45750340	CFAP410	NM_004928.3	c.643-131T>C		noncoding	238	0.504	Step 1
15	17:78063686	CCDC40	NM_017950.4	c.2832+3G>A		noncoding	273	0.516	Step 1
15	17:10302191	MYH8	NM_002472.3	c.3875G>A	p.(Arg1292Gln)	missense	159	0.54	Step 1
15	18:50683844	DCC	NM_005215.4	c.1380A>C	p.(Gln460His)	missense	228	0.456	Step 1
15	12:7242267	C1R	NM_001733.7	c.487C>T	p.(His163Tyr)	missense	269	0.479	Step 1
15	12:102479539	NUP37	NM_024057.4	c.540+5T>G		noncoding	163	0.429	Step 1
15	12:89745569	DUSP6	NM_001946.4	c.248G>A	p.(Arg83Gln)	missense	195	0.487	Step 1
15	11:65487707	RNASEH2C	NM_032193.4	c.348+6C>T		noncoding	269	0.49	Step 1
15	9:98775198	ERCC6L2	NM_020207.7	c.4366C>G	p.(Pro1456Ala)	missense	267	0.531	Step 1
15	9:35748676	GBA2	NM_020944.3	c.26T>C	p.(Met9Thr)	missense	209	0.511	Step 1
15	10:101474424	COX15	NM_078470.6	c.1153G>A	p.(Ala385Thr)	missense	187	0.394	Step 1
15	10:81921771	ANXA11	NM_145868.2	c.1100C>T	p.(Ala367Val)	missense	173	0.398	Step 1
15	7:103202406	RELN	NM_005045.4	c.5211-8_5211-7dup		noncoding	58	0.419	Step 1
15	7:33296891	BBS9	NM_198428.3	c.486G>A	p.(Met162Ile)	missense	207	0.492	Step 1
15	7:30655663	GARS1	NM_002047.4	c.1183G>A	p.(Ala395Thr)	missense	224	0.441	Step 1
15	7:30062365	FKBP14	NM_017946.4	c.265G>A	p.(Asp89Asn)	missense	256	0.531	Step 1
15	5:13901366	DNAH5	NM_001369.3	c.2047C>T	p.(Arg683Trp)	missense	229	0.51	Step 1
15	4:83347684	HNRNPDL	NM_031372.4	c.1124G>A	p.(Gly375Asp)	missense	217	0.465	Step 1
15	4:76489355	ODAPH	NM_178497.5	c.99T>G	p.(Asp33Glu)	missense	210	0.528	Step 1
15	3:53133472	RFT1	NM_052859.4	c.1133A>G	p.(Tyr378Cys)	missense	205	0.404	Step 1
15	3:47205357	SETD2	NM_014159.7	c.58C>T	p.(His20Tyr)	missense	83	0.445	Step 1
15	2:179613239	TTN	NM_001267550.2	c.11311+4612C>G		noncoding	287	0.519	Step 1
15	2:179483453	TTN	NM_001267550.2	c.46824A>T	p.(Leu15608Phe)	missense	295	0.525	Step 1
15	2:219677076	CYP27A1	NM_000784.4	c.578G>A	p.(Arg193Gln)	missense	220	0.459	Step 1
15	4:39274607	WDR19	NM_025132.4	c.3491T>A	p.(Val1164Asp)	missense	194	0.525	Step 1
15	2:219549910	STK36	NM_015690.5	c.1339T>C	p.(Cys447Arg)	missense	255	0.458	Step 1
15	4:6303731	WFS1	NM_006005.3	c.2209G>A	p.(Glu737Lys)	missense	192	0.578	Step 1
15	4:995891	IDUA	NM_000203.5	c.914G>C	p.(Gly305Ala)	missense	213	0.53	Step 1
15	X:62975043	ARHGEF9	NM_001353921.2	c.30+29953C>T		noncoding	113	0.548	Step 1
15	17:7906053	GUCY2D	NM_000180.4	c.-10+3_-10+6del		noncoding	74	0.608	Step 1
15	14:88895708	SPATA7	NM_018418.5	c.929C>T	p.(Thr310Ile)	missense	192	0.505	Step 1
15	15:45409386	DUOXA2	NM_207581.4	c.659_667del	p.(Gly220_Phe222del)	inframe	163	0.484	Step 1
15	12:6457974	SCNN1A	NM_001038.6	c.1554-6C>T		noncoding	269	0.479	Step 1
15	10:55581959	PCDH15	NM_001384140.1	c.4368-1973_4368-1970del		noncoding	262	0.503	Step 1
15	10:94825984	CYP26C1	NM_183374.3	c.1133G>A	p.(Arg378His)	missense	48	0.604	Step 1
15	11:32449535	WT1	NM_001198551.1	c.203G>A	p.(Ser68Asn)	missense	174	0.488	Step 1
15	8:77765167	ZFHX4	NM_024721.5	c.6010C>T	p.(Pro2004Ser)	missense	264	0.507	Step 1
15	4:155527787	FGG	NM_021870.3	c.1129+66_1129+69del		noncoding	103	0.514	Step 1
15	1:240256320	FMN2	NM_020066.5	c.911C>T	p.(Ala304Val)	missense	157	0.528	Step 1
15	1:234744496	IRF2BP2	NM_182972.3	c.745C>T	p.(His249Tyr)	missense	62	0.5	Step 1
15	1:17318244	ATP13A2	NM_022089.4	c.2236G>A	p.(Ala746Thr)	missense	207	0.536	Step 1
15	1:8390479	SLC45A1	NM_001080397.3	c.926C>T	p.(Pro309Leu)	missense	204	0.539	Step 1
15	1:1961191	GABRD	NM_000815.5	c.1049C>T	p.(Pro350Leu)	missense	174	0.511	Step 1
15	X:17710587	NHS	NM_001291867.2	c.851C>T	p.(Thr284Met)	missense	214	0.481	Step 1
15	22:27018586	CRYBA4	NM_001886.3	c.26C>T	p.(Ala9Val)	missense	115	0.46	Step 1
15	17:79771344	GCGR	NM_000160.5	c.1219-6C>A		noncoding	132	0.469	Step 1
15	17:78298918	RNF213	NM_001256071.3	c.3113C>T	p.(Pro1038Leu)	missense	278	0.435	Step 1
15	17:74288262	QRICH2	NM_001388453.1	c.2516_2545dup	p.(Arg839_Gln848dup)	inframe	172	0.269	Step 1
15	16:1252107	CACNA1H	NM_021098.3	c.1657G>C	p.(Ala553Pro)	missense	200	0.56	Step 1
15	19:5831538	FUT6	NM_000150.4	c.1041C>T	p.(Ser347=)	synonymous	184	0.25	Step 1
15	19:5831525	FUT6	NM_000150.4	c.1053_1054insGTG	p.(Thr351_Arg352insVal)	inframe	180	0.294	Step 1
15	19:5831522	FUT6	NM_000150.4	c.1057G>A	p.(Gly353Ser)	missense	185	0.308	Step 1
15	19:41351321	CYP2A6	NM_000762.6	c.1039G>A	p.(Ala347Thr)	missense	148	0.29	Step 1
15	15:85401084	ALPK3	NM_020778.5	c.3115C>T	p.(Arg1039Cys)	missense	244	0.504	Step 1
15	15:62320613	VPS13C	NM_020821.3	c.392A>G	p.(His131Arg)	missense	225	0.515	Step 1
15	14:92537354	ATXN3	NM_004993.6	c.915_916insCAGCAGCAGCAGCAGCAGCAGCAGCAGCAGCAGCAGCAGCAGCAGCAGCA	p.(Gly306GlnfsTer42)	frameshift	65	0.517	Step 1
15	14:91806262	CCDC88C	NM_001080414.4	c.590G>A	p.(Arg197Gln)	missense	120	0.508	Step 1
15	19:17013484	CPAMD8	NM_015692.5	c.4660A>G	p.(Lys1554Glu)	missense	135	0.488	Step 1
15	12:52685179	KRT81	NM_002281.4	c.71G>A	p.(Arg24His)	missense	242	0.495	Step 1
15	12:14994015	ART4	NM_021071.4	c.217G>A	p.(Val73Ile)	missense	304	0.457	Step 1
15	12:14805909	GUCY2C	NM_004963.4	c.1510C>T	p.(Arg504Ter)	nonsense	211	0.454	Step 1
15	12:14774965	GUCY2C	NM_004963.4	c.2575A>G	p.(Ile859Val)	missense	230	0.543	Step 1
15	11:120996320	TECTA	NM_005422.4	c.1513G>A	p.(Asp505Asn)	missense	252	0.559	Step 1
15	12:64536393	SRGAP1	NM_020762.4	c.3199C>G	p.(Pro1067Ala)	missense	279	0.512	Step 1
15	10:27326862	ANKRD26	NM_014915.3	c.2497C>T	p.(Leu833Phe)	missense	201	0.407	Step 1
15	10:16870839	CUBN	NM_001081.4	c.10729G>A	p.(Ala3577Thr)	missense	233	0.618	Step 1
15	9:138395852	MRPS2	NM_016034.5	c.764C>T	p.(Thr255Met)	missense	288	0.437	Step 1
15	9:108424814	TAL2	NM_005421.3	c.37T>C	p.(Trp13Arg)	missense	228	0.464	Step 1
15	9:136131109	ABO	NM_020469.3	c.1006A>G	p.(Arg336Gly)	missense	216	0.481	Step 1
15	11:2185555	TH	NM_000360.4	c.1402G>A	p.(Val468Met)	missense	169	0.473	Step 1
15	7:30963473	AQP1	NM_198098.4	c.*229C>T		UTR	269	0.509	Step 1
15	7:30951797	AQP1	NM_198098.4	c.273C>G	p.(Ile91Met)	missense	251	0.47	Step 1
15	8:12956088	DLC1	NM_182643.3	c.2991-4G>A		noncoding	235	0.459	Step 1
15	8:10466476	RP1L1	NM_178857.6	c.5132G>C	p.(Gly1711Ala)	missense	327	0.519	Step 1
15	5:476686	SLC9A3	NM_004174.4	c.1862A>G	p.(Gln621Arg)	missense	223	0.488	Step 1
15	5:139722340	HBEGF	NM_001945.3	c.278A>G	p.(Lys93Arg)	missense	231	0.506	Step 1
15	3:49459009	AMT	NM_000481.4	c.259-4C>G		noncoding	237	0.472	Step 1
15	4:656386	PDE6B	NM_000283.4	c.1811C>T	p.(Thr604Ile)	missense	197	0.517	Step 1
15	1:78392548	NEXN	NM_144573.4	c.835C>T	p.(Arg279Cys)	missense	277	0.498	Step 1
15	1:152280146	FLG	NM_002016.2	c.7214_7215del	p.(Ala2405GlyfsTer17)	frameshift	168	0.267	Step 1
15	1:152280144	FLG	NM_002016.2	c.7217_7218insGA	p.(Arg2407LysfsTer13)	frameshift	170	0.294	Step 1
15	1:152280164	FLG	NM_002016.2	c.7198A>G	p.(Thr2400Ala)	missense	160	0.256	Step 1
15	1:152280142	FLG	NM_002016.2	c.7220G>C	p.(Arg2407Thr)	missense	172	0.29	Step 1
15	1:44085391	PTPRF	NM_002840.5	c.4973G>C	p.(Ser1658Thr)	missense	274	0.503	Step 1
15	1:38082261	RSPO1	NM_001242908.2	c.181T>C	p.(Phe61Leu)	missense	156	0.493	Step 1
15	18:31226219	ASXL3	NM_030632.3	c.257C>T	p.(Ser86Leu)	missense	189	0.47	Step 1
15	17:74729418	METTL23	NM_001080510.5	c.366G>C	p.(Lys122Asn)	missense	296	0.452	Step 1
15	19:1468246	APC2	NM_005883.3	c.4946G>A	p.(Arg1649His)	missense	85	0.588	Step 1
15	14:53570472	DDHD1	NM_001160148.2	c.941A>G	p.(Asn314Ser)	missense	247	0.518	Step 1
15	1:108697684	SLC25A24	NM_013386.5	c.743G>A	p.(Arg248His)	missense	220	0.477	Step 1
15	10:43292337	BMS1	NM_014753.4	c.1645G>A	p.(Ala549Thr)	missense	324	0.49	Step 1
15	1:167780067	ADCY10	NM_018417.6	c.4566A>G	p.(Ile1522Met)	missense	268	0.496	Step 1
15	18:28586874	DSC3	NM_001941.5	c.1887T>A	p.(Asn629Lys)	missense	206	0.524	Step 1
15	17:42429479	GRN	NM_002087.4	c.1276C>G	p.(Leu426Val)	missense	238	0.516	Step 1
15	19:45314515	BCAM	NM_005581.5	c.116C>T	p.(Pro39Leu)	missense	192	0.473	Step 1
15	11:108384686	EXPH5	NM_015065.3	c.1548T>A	p.(Ser516Arg)	missense	312	0.525	Step 1
15	9:135946855	CEL	NM_001807.6	c.1966G>C	p.(Ala656Pro)	missense	22	0.545	Step 1
15	9:135946849	CEL	NM_001807.6	c.1960T>G	p.(Ser654Ala)	missense	19	0.631	Step 1
15	2:209165733	PIKFYVE	NM_015040.4	c.1123C>T	p.(Arg375Cys)	missense	296	0.496	Step 1
15	1:152328835	FLG2	NM_001014342.3	c.1427C>T	p.(Thr476Ile)	missense	351	0.515	Step 1
16	4:1806119	FGFR3	NM_000142.5	c.1138G>A	p.(Gly380Arg)	missense	281	0.466	Step 1,2 and 3
16	2:44037520	DYNC2LI1	NM_001348913.2	c.997G>C	p.(Ala333Pro)	missense	264	0.458	Step 1 and 2
16	17:6538499	KIAA0753	NM_014804.3	c.-68-8C>G		noncoding	122	0.5	Step 1 and 2
16	4:128621168	INTU	NM_015693.4	c.1453G>A	p.(Glu485Lys)	missense	192	0.5	Step 1 and 2
16	8:100887797	VPS13B	NM_152564.5	c.11897A>T	p.(Lys3966Ile)	missense	354	0.519	Step 1
16	9:94486659	ROR2	NM_004560.4	c.2117G>A	p.(Arg706Gln)	missense	235	0.497	Step 1
16	4:126371887	FAT4	NM_001291303.3	c.9722A>G	p.(Asp3241Gly)	missense	298	0.503	Step 1
16	4:126240523	FAT4	NM_001291303.3	c.2957T>A	p.(Val986Asp)	missense	332	0.515	Step 1
16	1:45293155	PTCH2	NM_003738.5	c.2290A>G	p.(Ser764Gly)	missense	294	0.527	Step 1
16	22:35820188	MCM5	NM_006739.4	c.2145G>C	p.(Met715Ile)	missense	144	0.465	Step 1
16	19:48814878	ODAD1	NM_001364171.2	c.529C>T	p.(Arg177Trp)	missense	268	0.559	Step 1
16	17:44060901	MAPT	NM_001377265.1	c.956G>A	p.(Arg319Gln)	missense	325	0.492	Step 1
16	19:35617751	LGI4	NM_139284.3	c.793+6C>A		noncoding	324	0.512	Step 1
16	15:44914463	SPG11	NM_025137.4	c.2398del	p.(Tyr800IlefsTer19)	frameshift	283	0.42	Step 1
16	17:10317227	MYH8	NM_002472.3	c.1139G>T	p.(Gly380Val)	missense	253	0.501	Step 1
16	16:30996986	HSD3B7	NM_025193.4	c.7G>A	p.(Asp3Asn)	missense	227	0.541	Step 1
16	16:27689174	KATNIP	NM_015202.5	c.665T>C	p.(Leu222Pro)	missense	291	0.518	Step 1
16	9:36249256	GNE	NM_005476.7	c.97A>T	p.(Lys33Ter)	nonsense	269	0.531	Step 1
16	9:34658610	IL11RA	NM_001142784.3	c.740C>T	p.(Pro247Leu)	missense	243	0.539	Step 1
16	8:145003337	PLEC	NM_201384.3	c.3194C>T	p.(Ser1065Leu)	missense	268	0.507	Step 1
16	10:71139658	HK1	NM_000188.3	c.1072C>T	p.(Arg358Cys)	missense	226	0.522	Step 1
16	10:75911038	ADK	NM_006721.4	c.2T>A		start_lost	166	0.385	Step 1
16	10:23482740	PTF1A	NM_178161.3	c.892G>T	p.(Ala298Ser)	missense	295	0.45	Step 1
16	8:77896109	PEX2	NM_000318.3	c.306A>T	p.(Gln102His)	missense	296	0.489	Step 1
16	9:134026097	NUP214	NM_005085.4	c.2222G>T	p.(Arg741Leu)	missense	339	0.415	Step 1
16	5:13719123	DNAH5	NM_001369.3	c.12367C>T	p.(His4123Tyr)	missense	283	0.498	Step 1
16	4:151504191	MAB21L2	NM_006439.5	c.10G>A	p.(Ala4Thr)	missense	127	0.503	Step 1
16	6:41129313	TREM2	NM_018965.4	c.79G>A	p.(Val27Met)	missense	303	0.445	Step 1
16	7:138437518	ATP6V0A4	NM_020632.3	c.881C>T	p.(Ser294Phe)	missense	246	0.463	Step 1
16	7:128657033	TNPO3	NM_012470.4	c.395+4A>T		noncoding	253	0.478	Step 1
16	4:88537054	DSPP	NM_014208.3	c.3240T>A	p.(Asp1080Glu)	missense	31	0.258	Step 1
16	4:79328818	FRAS1	NM_025074.7	c.4131G>A	p.(Gly1377=)	synonymous	230	0.508	Step 1
16	5:178634621	ADAMTS2	NM_014244.5	c.784G>A	p.(Ala262Thr)	missense	296	0.533	Step 1
16	4:15516399	CC2D2A	NM_001378615.1	c.787G>A	p.(Asp263Asn)	missense	301	0.534	Step 1
16	5:37226961	CPLANE1	NM_001384732.1	c.1736C>T	p.(Ala579Val)	missense	214	0.514	Step 1
16	2:179485612	TTN	NM_001267550.2	c.45725G>A	p.(Arg15242Lys)	missense	307	0.491	Step 1
16	2:179583569	TTN	NM_001267550.2	c.24358C>T	p.(Pro8120Ser)	missense	333	0.516	Step 1
16	2:179547564	TTN	NM_001267550.2	c.32954G>C	p.(Arg10985Pro)	missense	306	0.46	Step 1
16	1:155581223	MSTO1	NM_018116.4	c.367-117C>T		noncoding	290	0.548	Step 1
16	1:155160736	MUC1	NM_001371720.1	c.1424T>G	p.(Phe475Cys)	missense	263	0.471	Step 1
16	1:45974877	MMACHC	NM_015506.3	c.840del	p.(Gly281AlafsTer10)	frameshift	240	0.529	Step 1
16	19:1625584	TCF3	NM_003200.5	c.490G>T	p.(Gly164Cys)	missense	126	0.428	Step 1
16	15:52635330	MYO5A	NM_001382347.1	c.4024T>G	p.(Leu1342Val)	missense	270	0.459	Step 1
16	15:52635326	MYO5A	NM_001382347.1	c.4028A>T	p.(Lys1343Ile)	missense	258	0.449	Step 1
16	15:52635324	MYO5A	NM_001382347.1	c.4029_4030insT	p.(Gln1344SerfsTer18)	frameshift	256	0.449	Step 1
16	11:102464198	MMP20	NM_004771.4	c.1219C>T	p.(Leu407Phe)	missense	260	0.53	Step 1
16	6:135787048	AHI1	NM_001134831.2	c.653A>G	p.(Tyr218Cys)	missense	304	0.529	Step 1
16	7:128478401	FLNC	NM_001458.5	c.1128C>A	p.(Asn376Lys)	missense	302	0.493	Step 1
16	5:90070066	ADGRV1	NM_032119.4	c.12349C>T	p.(Arg4117Cys)	missense	330	0.463	Step 1
16	2:220283470	DES	NM_001927.4	c.286G>T	p.(Ala96Ser)	missense	311	0.501	Step 1
16	3:49167837	LAMB2	NM_002292.4	c.1052G>T	p.(Gly351Val)	missense	282	0.521	Step 1
16	1:197024952	F13B	NM_001994.3	c.1247C>A	p.(Ala416Glu)	missense	324	0.524	Step 1
16	1:172628621	FASLG	NM_000639.3	c.280T>G	p.(Leu94Val)	missense	279	0.541	Step 1
16	1:240371492	FMN2	NM_020066.5	c.3380C>T	p.(Ala1127Val)	missense	147	0.342	Step 1
16	17:33481656	UNC45B	NM_001267052.2	c.535A>G	p.(Asn179Asp)	missense	250	0.512	Step 1
16	8:145738299	RECQL4	NM_004260.4	c.2686G>C	p.(Val896Leu)	missense	279	0.48	Step 1
16	17:79968700	ASPSCR1	NM_024083.4	c.1193C>G	p.(Pro398Arg)	missense	191	0.534	Step 1
16	22:38155255	TRIOBP	NM_001039141.3	c.6308C>T	p.(Pro2103Leu)	missense	167	0.431	Step 1
16	22:38122252	TRIOBP	NM_001039141.3	c.3689C>T	p.(Pro1230Leu)	missense	283	0.568	Step 1
16	22:38130785	TRIOBP	NM_001039141.3	c.4442C>T	p.(Ser1481Phe)	missense	344	0.5	Step 1
16	17:63193237	RGS9	NM_003835.4	c.861-7C>T		noncoding	252	0.523	Step 1
16	16:72153960	PMFBP1	NM_031293.3	c.2797C>G	p.(Gln933Glu)	missense	253	0.486	Step 1
16	19:36494355	SYNE4	NM_001039876.3	c.1090_1098del	p.(Phe364_Leu366del)	inframe	285	0.4	Step 1
16	18:44146397	LOXHD1	NM_001384474.1	c.2260A>G	p.(Ile754Val)	missense	226	0.451	Step 1
16	18:44109211	LOXHD1	NM_001384474.1	c.4459G>A	p.(Asp1487Asn)	missense	269	0.479	Step 1
16	18:7007157	LAMA1	NM_005559.4	c.4241C>T	p.(Pro1414Leu)	missense	268	0.552	Step 1
16	12:57571380	LRP1	NM_002332.3	c.4361+6C>T		noncoding	227	0.506	Step 1
16	11:121032882	TECTA	NM_005422.4	c.5075T>G	p.(Leu1692Arg)	missense	232	0.443	Step 1
16	11:120998544	TECTA	NM_005422.4	c.1858T>C	p.(Ser620Pro)	missense	275	0.516	Step 1
16	12:40653374	LRRK2	NM_198578.4	c.1511C>T	p.(Ala504Val)	missense	266	0.458	Step 1
16	9:712487	KANK1	NM_015158.5	c.1721G>C	p.(Arg574Thr)	missense	296	0.527	Step 1
16	12:14774965	GUCY2C	NM_004963.4	c.2575A>G	p.(Ile859Val)	missense	267	0.456	Step 1
16	11:71817082	LRTOMT	NM_001145309.4	c.184C>T	p.(Arg62Cys)	missense	291	0.522	Step 1
16	11:68846450	TPCN2	NM_139075.4	c.1501A>C	p.(Ser501Arg)	missense	239	0.514	Step 1
16	10:96076335	PLCE1	NM_016341.4	c.6164T>C	p.(Val2055Ala)	missense	240	0.491	Step 1
16	6:117248606	RFX6	NM_173560.4	c.2302A>G	p.(Asn768Asp)	missense	299	0.531	Step 1
16	9:117810816	TNC	NM_002160.4	c.4580-5T>C		noncoding	210	0.447	Step 1
16	8:27321215	CHRNA2	NM_000742.4	c.745G>A	p.(Ala249Thr)	missense	241	0.435	Step 1
16	5:476734	SLC9A3	NM_004174.4	c.1814G>A	p.(Arg605Gln)	missense	242	0.45	Step 1
16	7:127253115	PAX4	NM_001366110.1	c.676C>T	p.(Arg226Cys)	missense	217	0.493	Step 1
16	6:44270138	AARS2	NM_020745.4	c.2477G>A	p.(Arg826Gln)	missense	285	0.512	Step 1
16	4:145040838	GYPA	NM_002099.8	c.232+1G>C		splice	227	0.436	Step 1
16	4:106395107	PPA2	NM_176869.3	c.101T>C	p.(Leu34Pro)	missense	126	0.587	Step 1
16	5:110462571	WDR36	NM_139281.3	c.2678C>T	p.(Ala893Val)	missense	207	0.439	Step 1
16	3:12232015	SYN2	NM_133625.6	c.1639T>G	p.(Phe547Val)	missense	233	0.527	Step 1
16	3:58502943	ACOX2	NM_003500.4	c.1840C>T	p.(Arg614Cys)	missense	195	0.497	Step 1
16	1:152323500	FLG2	NM_001014342.3	c.6755_6761del	p.(Gly2252AlafsTer148)	frameshift	305	0.439	Step 1
16	1:152324054	FLG2	NM_001014342.3	c.6208G>A	p.(Gly2070Arg)	missense	280	0.471	Step 1
16	2:27461392	CAD	NM_004341.5	c.4954C>T	p.(Arg1652Cys)	missense	279	0.473	Step 1
16	16:30992394	SETD1A	NM_014712.3	c.4705A>C	p.(Lys1569Gln)	missense	297	0.511	Step 1
16	2:113513993	CKAP2L	NM_152515.5	c.955C>G	p.(Arg319Gly)	missense	326	0.506	Step 1
16	1:186278263	PRG4	NM_005807.6	c.3412A>G	p.(Met1138Val)	missense	236	0.538	Step 1
16	19:42776141	CIC	NM_001386298.1	c.206G>A	p.(Arg69Gln)	missense	299	0.421	Step 1
16	14:21756212	RPGRIP1	NM_020366.4	c.77C>T	p.(Ala26Val)	missense	269	0.494	Step 1
16	16:2155900	PKD1	NM_001009944.3	c.7829A>C	p.(Glu2610Ala)	missense	258	0.523	Step 1
16	2:239161644	PER2	NM_022817.3	c.3020T>C	p.(Met1007Thr)	missense	270	0.462	Step 1
16	2:186655162	FSIP2	NM_173651.4	c.3299A>G	p.(His1100Arg)	missense	285	0.477	Step 1
16	1:152282495	FLG	NM_002016.2	c.4867C>T	p.(Arg1623Trp)	missense	365	0.523	Step 1
17	4:1808562	FGFR3	NM_000142.5	c.2175G>C	p.(Met725Ile)	missense	201	0.467	Step 1 and 2
17	4:1806119	FGFR3	NM_000142.5	c.1138G>A	p.(Gly380Arg)	missense	226	0.495	Step 1,2 and 3
17	2:44047175	DYNC2LI1	NM_001348913.2	c.*16-7350G>T		noncoding	330	0.466	Step 1 and 2
17	11:102992205	DYNC2H1	NM_001377.3	c.1465G>A	p.(Val489Ile)	missense	273	0.465	Step 1 and 2
17	15:89398763	ACAN	NM_001369268.1	c.2947G>C	p.(Glu983Gln)	missense	289	0.474	Step 1 and 2
17	12:110221473	TRPV4	NM_021625.5	c.2569C>A	p.(Gln857Lys)	missense	189	0.523	Step 1 and 2
17	21:44270268	WDR4	NM_018669.6	c.1130A>G	p.(Glu377Gly)	missense	137	0.554	Step 1 and 2
17	18:72346997	ZNF407	NM_017757.3	c.4022T>A	p.(Ile1341Asn)	missense	329	0.492	Step 1 and 2
17	3:142172064	ATR	NM_001184.4	c.7667C>G	p.(Thr2556Ser)	missense	249	0.489	Step 1 and 2
17	X:153594494	FLNA	NM_001110556.2	c.1327C>T	p.(Arg443Cys)	missense	94	1	Step 1
17	12:133201522	POLE	NM_006231.4	c.6716C>T	p.(Ala2239Val)	missense	184	0.505	Step 1
17	14:45636182	FANCM	NM_020937.4	c.1818A>C	p.(Arg606Ser)	missense	194	0.505	Step 1
17	5:112111319	APC	NM_000038.6	c.423-5_423-2del		noncoding	173	0.45	Step 1
17	21:46825313	COL18A1	NM_001379500.1	c.31C>T	p.(Arg11Trp)	missense	18	0.666	Step 1
17	18:21451524	LAMA3	NM_198129.4	c.4897G>A	p.(Glu1633Lys)	missense	216	0.458	Step 1
17	18:10857000	PIEZO2	NM_001378183.1	c.702G>A	p.(Ser234=)	synonymous	241	0.556	Step 1
17	17:8139565	CTC1	NM_025099.6	c.888G>T	p.(Gln296His)	missense	262	0.538	Step 1
17	19:36214675	KMT2B	NM_014727.3	c.3101A>C	p.(Glu1034Ala)	missense	179	0.256	Step 1
17	17:1400025	INPP5K	NM_016532.4	c.1036A>T	p.(Met346Leu)	missense	265	0.475	Step 1
17	16:1402021	GNPTG	NM_032520.5	c.52+3G>T		noncoding	36	0.5	Step 1
17	15:91548328	VPS33B	NM_018668.5	c.1127T>G	p.(Ile376Ser)	missense	277	0.57	Step 1
17	16:88500629	ZNF469	NM_001367624.2	c.6751A>G	p.(Arg2251Gly)	missense	263	0.471	Step 1
17	17:30264366	SUZ12	NM_015355.4	c.101C>G	p.(Ala34Gly)	missense	197	0.522	Step 1
17	19:8654168	ADAMTS10	NM_030957.4	c.2116G>A	p.(Glu706Lys)	missense	218	0.513	Step 1
17	19:3110230	GNA11	NM_002067.5	c.220G>A	p.(Gly74Ser)	missense	171	0.467	Step 1
17	16:28947515	CD19	NM_001770.6	c.988A>G	p.(Thr330Ala)	missense	214	0.546	Step 1
17	16:28944704	CD19	NM_001770.6	c.709A>G	p.(Arg237Gly)	missense	180	0.483	Step 1
17	11:77830292	ALG8	NM_024079.5	c.482T>C	p.(Ile161Thr)	missense	172	0.552	Step 1
17	9:140126108	SLC34A3	NM_001177316.2	c.-39-8C>T		noncoding	140	0.528	Step 1
17	9:139391688	NOTCH1	NM_017617.5	c.6503G>A	p.(Cys2168Tyr)	missense	241	0.473	Step 1
17	12:120208711	CIT	NM_001206999.2	c.2086C>T	p.(Arg696Cys)	missense	252	0.496	Step 1
17	10:50950997	OGDHL	NM_018245.3	c.1889C>T	p.(Ala630Val)	missense	174	0.511	Step 1
17	7:146536884	CNTNAP2	NM_014141.6	c.290C>A	p.(Ala97Asp)	missense	298	0.54	Step 1
17	6:166580956	TBXT	NM_001366285.2	c.124C>G	p.(Leu42Val)	missense	175	0.542	Step 1
17	5:37167313	CPLANE1	NM_001384732.1	c.7236C>T	p.(Cys2412=)	synonymous	271	0.446	Step 1
17	5:13870977	DNAH5	NM_001369.3	c.3733C>T	p.(Arg1245Cys)	missense	282	0.517	Step 1
17	4:184622952	TRAPPC11	NM_021942.6	c.2954C>A	p.(Ser985Tyr)	missense	264	0.488	Step 1
17	6:105300252	HACE1	NM_020771.4	c.77-7dup		noncoding	168	0.503	Step 1
17	8:99168559	POP1	NM_001145860.2	c.2339C>T	p.(Ser780Leu)	missense	282	0.528	Step 1
17	5:178580539	ADAMTS2	NM_014244.5	c.1468G>A	p.(Glu490Lys)	missense	201	0.467	Step 1
17	5:177035588	B4GALT7	NM_007255.3	c.688G>A	p.(Glu230Lys)	missense	191	0.523	Step 1
17	4:83763422	SEC31A	NM_001077207.4	c.2839C>A	p.(Pro947Thr)	missense	213	0.464	Step 1
17	3:12580792	TSEN2	NM_001321278.2	c.1471A>G	p.(Thr491Ala)	missense	64	0.562	Step 1
17	4:6302757	WFS1	NM_006005.3	c.1235T>C	p.(Val412Ala)	missense	261	0.509	Step 1
17	4:980948	IDUA	NM_000203.5	c.76G>A	p.(Ala26Thr)	missense	39	0.461	Step 1
17	2:167137049	SCN9A	NM_001365536.1	c.2161T>G	p.(Phe721Val)	missense	322	0.475	Step 1
17	2:26461996	HADHA	NM_000182.5	c.83A>G	p.(Asn28Ser)	missense	255	0.505	Step 1
17	1:204931293	NFASC	NM_001005388.3	c.706+4339C>T		noncoding	221	0.466	Step 1
17	1:161479832	FCGR2A	NM_001136219.3	c.587T>A	p.(Phe196Tyr)	missense	325	0.449	Step 1
17	2:152410418	NEB	NM_001164508.2	c.19550G>A	p.(Arg6517His)	missense	296	0.496	Step 1
17	1:202742282	KDM5B	NM_006618.5	c.540C>G	p.(Asn180Lys)	missense	274	0.47	Step 1
17	2:55582848	CCDC88A	NM_001365480.1	c.667T>A	p.(Phe223Ile)	missense	245	0.448	Step 1
17	2:47233065	TTC7A	NM_020458.4	c.1070C>G	p.(Thr357Ser)	missense	179	0.53	Step 1
17	2:44047175	ABCG5	NM_022436.3	c.1528C>A	p.(His510Asn)	missense	330	0.466	Step 1
17	1:228271079	ARF1	NM_001658.4	c.-38+613C>G		noncoding	169	0.491	Step 1
17	1:120278017	PHGDH	NM_006623.4	c.743C>T	p.(Ala248Val)	missense	233	0.527	Step 1
17	1:27876682	AHDC1	NM_001371928.1	c.1945G>A	p.(Ala649Thr)	missense	192	0.489	Step 1
17	1:6529182	PLEKHG5	NM_020631.6	c.2166_2168dup	p.(Glu723dup)	inframe	235	0.475	Step 1
17	18:2929124	LPIN2	NM_001375808.2	c.1489G>A	p.(Glu497Lys)	missense	221	0.447	Step 1
17	14:65239572	SPTB	NM_001355436.2	c.5279C>T	p.(Ala1760Val)	missense	180	0.477	Step 1
17	14:64595164	SYNE2	NM_182914.3	c.13918-6T>C		noncoding	196	0.448	Step 1
17	16:9943670	GRIN2A	NM_001134407.3	c.1271C>T	p.(Pro424Leu)	missense	149	0.536	Step 1
17	11:5247153	HBB	NM_000518.5	c.316-197C>T		noncoding	236	0.529	Step 1
17	10:119003806	SLC18A2	NM_003054.6	c.446T>C	p.(Ile149Thr)	missense	242	0.52	Step 1
17	10:115644095	NHLRC2	NM_198514.4	c.995A>G	p.(Gln332Arg)	missense	256	0.5	Step 1
17	4:106157071	TET2	NM_001127208.3	c.1972C>T	p.(His658Tyr)	missense	363	0.482	Step 1
17	6:31996484	C4B	NM_001002029.4	c.3245T>C	p.(Val1082Ala)	missense	194	0.458	Step 1
17	3:52426578	DNAH1	NM_015512.5	c.10151G>A	p.(Arg3384His)	missense	175	0.485	Step 1
17	1:16382968	CLCNKB	NM_000085.5	c.1981C>T	p.(Arg661Trp)	missense	218	0.527	Step 1
17	17:33491088	UNC45B	NM_001267052.2	c.1054C>T	p.(Arg352Cys)	missense	156	0.532	Step 1
17	19:48626540	LIG1	NM_000234.3	c.2040G>C	p.(Gln680His)	missense	221	0.542	Step 1
17	X:70072943	TEX11	NM_031276.3	c.466A>G	p.(Met156Val)	missense	134	1	Step 1
17	21:35821937	KCNE1	NM_000219.6	c.-5C>A		UTR	212	0.509	Step 1
17	17:8808112	PIK3R5	NM_001142633.3	c.394G>A	p.(Ala132Thr)	missense	226	0.561	Step 1
17	20:62657416	PRPF6	NM_012469.4	c.2028+5G>A		noncoding	131	0.564	Step 1
17	20:60908769	LAMA5	NM_005560.6	c.2879-7C>T		noncoding	205	0.473	Step 1
17	15:86807803	AGBL1	NM_001386094.1	c.1402del	p.(Trp468GlyfsTer3)	frameshift	330	0.503	Step 1
17	11:118220582	CD3G	NM_000073.3	c.213del	p.(Lys71AsnfsTer40)	frameshift	274	0.533	Step 1
17	19:2994891	TLE6	NM_001143986.2	c.1615-7C>A		noncoding	97	0.505	Step 1
17	12:64521679	SRGAP1	NM_020762.4	c.2579G>A	p.(Arg860His)	missense	258	0.484	Step 1
17	15:58840688	LIPC	NM_000236.3	c.968C>T	p.(Thr323Met)	missense	230	0.482	Step 1
17	15:58838040	LIPC	NM_000236.3	c.674G>A	p.(Arg225Gln)	missense	259	0.482	Step 1
17	11:114182838	NNMT	NM_006169.3	c.434A>G	p.(Gln145Arg)	missense	291	0.518	Step 1
17	18:47432975	MYO5B	NM_001080467.3	c.2228G>T	p.(Arg743Leu)	missense	235	0.472	Step 1
17	11:85737413	PICALM	NM_007166.4	c.274-5dup		noncoding	185	0.471	Step 1
17	12:51388374	SLC11A2	NM_000617.3	c.1030C>T	p.(Leu344Phe)	missense	236	0.474	Step 1
17	12:42853996	PRICKLE1	NM_153026.3	c.2111A>T	p.(Tyr704Phe)	missense	302	0.493	Step 1
17	12:14993760	ART4	NM_021071.4	c.472T>C	p.(Tyr158His)	missense	305	0.475	Step 1
17	10:101606808	ABCC2	NM_000392.5	c.4239_4240dup	p.(His1414LeufsTer18)	frameshift	244	0.487	Step 1
17	10:101590480	ABCC2	NM_000392.5	c.2755T>A	p.(Ser919Thr)	missense	266	0.503	Step 1
17	13:60407323	DIAPH3	NM_001042517.2	c.2945T>C	p.(Ile982Thr)	missense	244	0.528	Step 1
17	10:88451757	LDB3	NM_007078.3	c.794G>A	p.(Arg265His)	missense	220	0.495	Step 1
17	10:17275638	VIM	NM_003380.5	c.677C>G	p.(Ser226Cys)	missense	281	0.469	Step 1
17	10:3202043	PITRM1	NM_014889.4	c.1004C>T	p.(Pro335Leu)	missense	244	0.479	Step 1
17	11:17591912	OTOG	NM_001292063.2	c.1930A>T	p.(Asn644Tyr)	missense	172	0.418	Step 1
17	10:48388450	RBP3	NM_002900.3	c.2428T>C	p.(Tyr810His)	missense	189	0.55	Step 1
17	7:30963473	AQP1	NM_198098.4	c.*229C>T		UTR	256	0.539	Step 1
17	9:2652779	VLDLR	NM_003383.5	c.2417-1G>T		splice	228	0.504	Step 1
17	6:160113838	SOD2	NM_000636.4	c.81C>A	p.(Ser27Arg)	missense	197	0.426	Step 1
17	4:160273968	RAPGEF2	NM_001394067.2	c.3997C>T	p.(Arg1333Cys)	missense	316	0.49	Step 1
17	2:241534090	CAPN10	NM_023083.4	c.961G>C	p.(Val321Leu)	missense	204	0.475	Step 1
17	8:18257703	NAT2	NM_000015.3	c.190C>T	p.(Arg64Trp)	missense	312	0.493	Step 1
17	6:36238342	PNPLA1	NM_001374623.1	c.106C>T	p.(Arg36Trp)	missense	236	0.525	Step 1
17	3:47040466	NBEAL2	NM_015175.3	c.3402C>A	p.(Asp1134Glu)	missense	318	0.509	Step 1
17	3:43760023	ABHD5	NM_016006.6	c.1049G>A	p.(Ter350=)	stop_retained	250	0.484	Step 1
17	2:136546052	LCT	NM_002299.4	c.5626G>A	p.(Gly1876Ser)	missense	273	0.479	Step 1
17	1:203191394	CHIT1	NM_003465.3	c.665C>T	p.(Thr222Met)	missense	308	0.503	Step 1
17	1:203148711	CHI3L1	NM_001276.4	c.1014G>A	p.(Val338=)	synonymous	178	0.533	Step 1
17	2:112766034	MERTK	NM_006343.3	c.1942A>C	p.(Asn648His)	missense	236	0.44	Step 1
17	1:237433860	RYR2	NM_001035.3	c.112G>T	p.(Ala38Ser)	missense	287	0.515	Step 1
17	1:94564445	ABCA4	NM_000350.3	c.673G>A	p.(Val225Met)	missense	235	0.497	Step 1
17	1:237013791	MTR	NM_000254.3	c.1663A>G	p.(Ile555Val)	missense	203	0.497	Step 1
17	1:62979455	DOCK7	NM_001367561.1	c.4051C>G	p.(Leu1351Val)	missense	278	0.503	Step 1
17	1:113650214	LRIG2	NM_014813.3	c.1314-2A>G		splice	192	0.479	Step 1
17	1:25729198	RHCE	NM_020485.8	c.375C>G	p.(Ile125Met)	missense	274	0.54	Step 1
17	1:162336955	NOS1AP	NM_014697.3	c.1219G>A	p.(Gly407Ser)	missense	121	0.454	Step 1
17	15:23892238	MAGEL2	NM_019066.5	c.652C>T	p.(Pro218Ser)	missense	349	0.446	Step 1
17	19:1467845	APC2	NM_005883.3	c.4545C>A	p.(Asp1515Glu)	missense	219	0.511	Step 1
17	6:138200372	TNFAIP3	NM_001270508.2	c.1790C>T	p.(Thr597Ile)	missense	309	0.537	Step 1
17	1:949586	ISG15	NM_005101.4	c.226G>A	p.(Asp76Asn)	missense	297	0.494	Step 1
17	19:48342659	CRX	NM_000554.6	c.335C>T	p.(Ala112Val)	missense	241	0.531	Step 1
17	19:14040470	CC2D1A	NM_017721.5	c.2707C>T	p.(Arg903Trp)	missense	85	0.4	Step 1
17	11:125830871	CDON	NM_001378964.1	c.3761C>T	p.(Pro1254Leu)	missense	284	0.482	Step 1
17	5:158750127	IL12B	NM_002187.3	c.299C>T	p.(Ser100Leu)	missense	322	0.487	Step 1
17	18:28934707	DSG1	NM_001942.4	c.2548T>G	p.(Ser850Ala)	missense	283	0.515	Step 1
17	15:85401106	ALPK3	NM_020778.5	c.3137G>A	p.(Arg1046His)	missense	261	0.578	Step 1
17	12:52702275	KRT86	NM_001320198.2	c.1367T>A	p.(Val456Asp)	missense	180	0.472	Step 1
17	9:135946532	CEL	NM_001807.6	c.1643C>T	p.(Ala548Val)	missense	591	0.37	Step 1
17	11:721146	EPS8L2	NM_022772.4	c.640G>A	p.(Gly214Ser)	missense	176	0.5	Step 1
17	1:152285150	FLG	NM_002016.2	c.2212G>A	p.(Gly738Arg)	missense	427	0.503	Step 1
17	1:152284955	FLG	NM_002016.2	c.2407T>C	p.(Ser803Pro)	missense	371	0.479	Step 1
17	1:152284099	FLG	NM_002016.2	c.3263G>A	p.(Gly1088Asp)	missense	441	0.453	Step 1
17	1:152282418	FLG	NM_002016.2	c.4944G>C	p.(Glu1648Asp)	missense	402	0.497	Step 1
17	1:152279848	FLG	NM_002016.2	c.7514A>G	p.(His2505Arg)	missense	384	0.5	Step 1
17	1:152279587	FLG	NM_002016.2	c.7775A>C	p.(His2592Pro)	missense	280	0.525	Step 1
17	1:152278609	FLG	NM_002016.2	c.8753C>G	p.(Ser2918Cys)	missense	655	0.274	Step 1
17	1:152278321	FLG	NM_002016.2	c.9041G>T	p.(Ser3014Ile)	missense	76	0.552	Step 1
17	1:152277929	FLG	NM_002016.2	c.9433T>C	p.(Ser3145Pro)	missense	198	0.823	Step 1
17	1:152276645	FLG	NM_002016.2	c.10717G>C	p.(Asp3573His)	missense	241	0.713	Step 1
18	4:1806119	FGFR3	NM_000142.5	c.1138G>A	p.(Gly380Arg)	missense	156	0.583	Step 1,2 and 3
18	2:20132090	WDR35	NM_020779.4	c.2777A>G	p.(Tyr926Cys)	missense	121	0.438	Step 1 and 2
18	16:4393205	PAM16	NM_016069.11	c.88+2dup		noncoding	155	0.47	Step 1 and 2
18	4:128595352	INTU	NM_015693.4	c.1165G>A	p.(Gly389Ser)	missense	148	0.398	Step 1 and 2
18	17:56292145	MKS1	NM_017777.4	c.472C>T	p.(Arg158Ter)	nonsense	122	0.508	Step 1
18	8:118842462	EXT1	NM_000127.3	c.1284+7G>A		noncoding	129	0.457	Step 1
18	16:70531944	COG4	NM_015386.3	c.1210C>A	p.(Leu404Met)	missense	146	0.479	Step 1
18	11:46880799	LRP4	NM_002334.4	c.5453G>T	p.(Gly1818Val)	missense	143	0.517	Step 1
18	1:117127410	IGSF3	NM_001007237.3	c.2705G>A	p.(Arg902His)	missense	174	0.511	Step 1
18	2:69351767	ANTXR1	NM_032208.3	c.943A>G	p.(Thr315Ala)	missense	100	0.53	Step 1
18	2:109522770	EDAR	NM_022336.4	c.1018G>A	p.(Val340Met)	missense	161	0.559	Step 1
18	3:184910361	EHHADH	NM_001966.4	c.1825A>G	p.(Ile609Val)	missense	163	0.515	Step 1
18	2:179535019	TTN	NM_001267550.2	c.35312C>T	p.(Pro11771Leu)	missense	100	0.45	Step 1
18	2:179602841	TTN	NM_001267550.2	c.14339G>A	p.(Ser4780Asn)	missense	138	0.507	Step 1
18	2:179610370	TTN	NM_001267550.2	c.11312-3722G>A		noncoding	138	0.514	Step 1
18	4:3491502	DOK7	NM_173660.5	c.751G>T	p.(Ala251Ser)	missense	149	0.516	Step 1
18	2:217341856	SMARCAL1	NM_014140.4	c.2452G>A	p.(Val818Met)	missense	151	0.45	Step 1
18	3:158366879	GFM1	NM_024996.7	c.622G>A	p.(Glu208Lys)	missense	104	0.461	Step 1
18	2:242681996	D2HGDH	NM_152783.5	c.490+8del		noncoding	145	0.517	Step 1
18	6:6174954	F13A1	NM_000129.4	c.1606C>T	p.(Leu536Phe)	missense	174	0.545	Step 1
18	5:223642	SDHA	NM_004168.4	c.109G>A	p.(Val37Ile)	missense	129	0.558	Step 1
18	5:37226961	CPLANE1	NM_001384732.1	c.1736C>T	p.(Ala579Val)	missense	121	0.52	Step 1
18	10:73122334	SLC29A3	NM_018344.6	c.1397C>G	p.(Ala466Gly)	missense	146	0.465	Step 1
18	9:101980464	ALG2	NM_033087.4	c.1003A>G	p.(Met335Val)	missense	177	0.508	Step 1
18	10:73887893	ASCC1	NM_001198800.3	c.904G>A	p.(Gly302Ser)	missense	95	0.4	Step 1
18	13:23927960	SACS	NM_014363.6	c.2149C>T	p.(Leu717Phe)	missense	146	0.547	Step 1
18	16:16313792	ABCC6	NM_001171.6	c.232G>A	p.(Ala78Thr)	missense	127	0.291	Step 1
18	11:88027675	CTSC	NM_001814.6	c.891C>T	p.(Gly297=)	synonymous	133	0.428	Step 1
18	12:56487317	ERBB3	NM_001982.4	c.1463G>A	p.(Arg488Gln)	missense	125	0.576	Step 1
18	11:101946761	CFAP300	NM_032930.3	c.593A>T	p.(Tyr198Phe)	missense	145	0.517	Step 1
18	15:42679978	CAPN3	NM_000070.3	c.526G>A	p.(Val176Met)	missense	172	0.488	Step 1
18	15:49034156	CEP152	NM_001194998.2	c.3977A>G	p.(Asp1326Gly)	missense	132	0.378	Step 1
18	14:58949354	KIAA0586	NM_001329943.3	c.3068A>G	p.(Asp1023Gly)	missense	159	0.515	Step 1
18	14:67525508	GPHN	NM_020806.5	c.1144+5T>A		noncoding	122	0.491	Step 1
18	15:63940284	HERC1	NM_003922.4	c.10862T>C	p.(Leu3621Pro)	missense	130	0.492	Step 1
18	11:124793337	HEPACAM	NM_152722.5	c.710-8C>T		noncoding	121	0.471	Step 1
18	19:13563837	CACNA1A	NM_001127222.2	c.400-8C>T		noncoding	87	0.459	Step 1
18	16:88495659	ZNF469	NM_001367624.2	c.1781C>T	p.(Pro594Leu)	missense	184	0.483	Step 1
18	14:89291074	TTC8	NM_144596.4	c.23T>A	p.(Leu8Gln)	missense	71	0.394	Step 1
18	16:3077487	THOC6	NM_024339.5	c.931G>A	p.(Ala311Thr)	missense	190	0.542	Step 1
18	17:3417944	TRPV3	NM_145068.4	c.2221G>A	p.(Glu741Lys)	missense	118	0.423	Step 1
18	17:3559883	CTNS	NM_004937.3	c.561+3A>G		noncoding	154	0.525	Step 1
18	19:1466988	APC2	NM_005883.3	c.3688A>G	p.(Ser1230Gly)	missense	190	0.447	Step 1
18	19:42874974	MEGF8	NM_001271938.2	c.7127A>C	p.(Lys2376Thr)	missense	60	0.316	Step 1
[truncated: 8,572 more rows]
