# Supplementary material for: Exome sequencing in fetuses with short long bones detected by ultrasonography: A retrospective cohort study
Source: Front Genet. 2023 Feb 27;14:1032346. doi: 10.3389/fgene.2023.1032346 (PMC10010437; doi:10.3389/fgene.2023.1032346)
Supplement: Supplementary file 3 [file Table4.XLSX]

## Sheet: Sheet1
Additional file 4 Table S4. Primer sequences for diagnostic de novo variants
Gene	Variant	Inheritance	F primer sequences (5'-3')	R primer sequences (5'-3')
COL1A1	(NM_000088):c.957+1G>T	de novo	GTCAAGGCTGTTCCACCC	TCCCTAGAGTTCCTGGGGAG
COL1A1	(NM_000088):c.3118G>A(p.G1040S)	de novo	GGTAGAGATGACTCCAGCGG	GAGGCCTGAAGAGTCCCTG
COL1A2	(NM_000089):c.1801G>A(p.Gly601Ser)	de novo	GCTCGGAAGCTACACAAATG	TGCTGTTTACTGAGAGGGAAG
COL1A2	(NM_000089):c.3034G>A(p.G1012S)	de novo	CGAATTAAGCAGTATTTGTGGTG	GCAGTGAAAATATGAAAATCCTTC
COL2A1	(NM_001844):c.1439G>A(p.G480E)	de novo	TACTCTGAGTCGAGGCTTGC	ACCACAAGGACTCCACTTCC
COL2A1	(NM_001844):c.3580G>C(p.G1194R)	de novo	AGTGGCTGGTGCTATCAGG	GATGCCATCACTGTTAGCTG
COL2A1	COL2A1(NM_001844):c.3472G>A(p.G1158S)	de novo	GGCTGGGACATAAAGCTG	TCCCCATGGGAACACAG
EBP	(NM_006579):c.214T>C(p.C72R)	de novo	AAATTCGGTCCATTTACATTTC	ATAGGTAAACATGCAAGCCG
FGFR3	(NM_000142):c.1138G>A(p.G380R)	de novo	CTGACTGCGAGACCCTCCAG	CGCCACATCCCTGACGGC
FGFR3	(NM_000142):c.746C>G(p.S249C)	de novo	GAACCTCATCCCGCCCTC	GAAGCTCCAACCCCTAGACC
FGFR3	(NM_000142):c.1620C>A(p.Asn540Lys)	de novo	GACACTCTTCGTCCTTACGAGC	CTGAAGCCTCTCCACCTCTC
FGFR3	(NM_000142):c.742C>T(p.R248C)	de novo	GAACCTCATCCCGCCCTC	GAAGCTCCAACCCCTAGACC
FGFR3	(NM_000142):c.1118A>G(p.Y373C)	de novo	CTGACTGCGAGACCCTCCAG	CGCCACATCCCTGACGGC
GLI3	(NM_000168):c.3172C>T(p.R1058*)	de novo	ACATGGAGAGGATGAGCCTG	CCAGCGTGGCTGTCTGG
NR2F1	(NM_005654):c.1117C>T(p.R373*)	de novo	GCCTTTGCTATTTGTCAGCC	CCAGGTGGGTCCTCTGAGTC
RAF1	(NM_002880):c.770C>T(p.S257L)	de novo	TGAAAGACTTCACCAGTATGAAAG	GAAATAAGTATCAACCTCACCCC
RARB	(NM_000965):c.1160G>A(p.R387H)	de novo	TGAAAATTGGTCCCTGGTTATC	TGCATTTTAAATCCTGGAACTG
SMARCA4	(NM_001128849):c.2653C>T(p.R885C)	de novo	GAGATTCTCCCCATGTGCC	ACACGTTCCAACCAGCAAAG
ZC4H2	(NM_018684):c.635C>T(p.S212F)	de novo	TTGTTGCCTGGAAGAATCTG	GACTCTGGTCAAGGTGAGGG
